# Supplementary material
Source: PubMed Central journal article supplement (PMC3546527)
Supplement: NIHMS424042-supplement-ESI.pdf [file NIHMS424042-supplement-ESI.pdf]

*Supporting Information*

**Mechanistic insight into inhibition of two-component system signaling**

Samson Francis,<sup>a</sup> Kaelyn E. Wilke,<sup>a</sup> Douglas E. Brown<sup>a</sup> and Erin E. Carlson<sup>a,b\*</sup>

<sup>a</sup> Department of Chemistry, Indiana University, 800 E. Kirkwood Avenue, Bloomington, Indiana, USA.

<sup>b</sup> Department of Molecular and Cellular Biochemistry, Indiana University, 212 S. Hawthorne Drive,  
Bloomington, Indiana, USA.

Corresponding Author: carlsone@indiana.edu

**Contents**

|                                                                            |    |
|----------------------------------------------------------------------------|----|
| Supporting Information Figures and Tables.....                             | 2  |
| Docking-Based Virtual Screening.....                                       | 34 |
| General.....                                                               | 34 |
| Docking of Compounds.....                                                  | 34 |
| <i>In Vitro</i> Activity Assays.....                                       | 35 |
| General Methods and Information.....                                       | 35 |
| Experimental Methods.....                                                  | 35 |
| HK853 Construct ( <i>Thermotoga maritima</i> ).....                        | 35 |
| PCR Site-Directed Mutagenesis for Generation of HK853 D411A Construct..... | 35 |
| Circular Dichroism (CD) Spectroscopy of HK853 Proteins.....                | 37 |
| Rescue ABPP analysis of NH125 (3), 48, 49, 50 and 51.....                  | 39 |
| Saturation Transfer Differential NMR Experiments.....                      | 40 |
| Determination of $K_d$ Using STD-NMR.....                                  | 40 |
| Measurement of STD Amplification Factors.....                              | 43 |
| References.....                                                            | 43 |

## Supporting Information Figures and Tables

**Table S1.** Rank and score of compounds reported to demonstrate TCS inhibitory activities and their corresponding Surflex score, rank, and documented biological data.

| # | Structure                                                                           | Receptor 11D0 |      | Receptor 1158 |      | Receptor 2C2A |      | Receptor 3CGY |      |                                                    |                          |                          |     |              |
|---|-------------------------------------------------------------------------------------|---------------|------|---------------|------|---------------|------|---------------|------|----------------------------------------------------|--------------------------|--------------------------|-----|--------------|
|   |                                                                                     | Surflex Score | Rank | TCS Tested                                         | IC <sub>50</sub> HK (μM) | IC <sub>50</sub> RR (μM) | MIC | Ref.         |
| 1 | 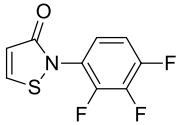   | 2.6341        | 1029 | 3.251         | 1030 | 3.5142        | 1040 | 3.0847        | 953  | AlgR2                                              | 2                        | -                        | -   | <sup>1</sup> |
| 2 |    | 3.0404        | 1009 | 3.518         | 1018 | 3.8778        | 1029 | 1.6857        | 1040 | AlgR2                                              | 2                        | -                        | -   | <sup>1</sup> |
| 3 |    | 5.2403        | 559  | 8.7544        | 79   | 9.2257        | 141  | 6.3868        | 126  | AlgR1<br>AlgR2<br>CheA<br>NR <sub>II</sub><br>KinA | 0.4-0.6                  | -                        | -   | <sup>1</sup> |
| 4 |    | 7.868         | 52   | 9.8076        | 23   | 8.7226        | 212  | 5.6508        | 278  | AlgR1<br>AlgR2<br>CheA<br>NR <sub>II</sub><br>KinA | 0.4-0.6                  | -                        | -   | <sup>1</sup> |
| 5 |  | 9.8154        | 6    | 8.2835        | 132  | 9.2701        | 143  | 6.8504        | 75   | HpKA-DrrA                                          | -                        | -                        | -   | <sup>2</sup> |
| 6 |  | 4.4319        | 808  | 3.7157        | 1002 | 5.0129        | 984  | 2.6174        | 1005 | HpKA-DrrA                                          | 30                       | 30                       | 1   | <sup>2</sup> |

|    |                                                                                     |        |     |        |     |         |     |        |     |           |       |      |       |   |
|----|-------------------------------------------------------------------------------------|--------|-----|--------|-----|---------|-----|--------|-----|-----------|-------|------|-------|---|
| 7  | 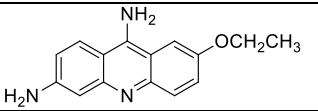   | 6.1823 | 311 | 6.2405 | 533 | 7.7782  | 412 | 5.3572 | 353 | HpKA-DrrA | 29.5  | 29.5 | -     | 2 |
| 8  |    | 5.3822 | 522 | 6.9377 | 373 | 9.3379  | 128 | 5.6119 | 276 | VicK      | 542.3 | -    | 100   | 3 |
| 9  |    | 7.8251 | 58  | 7.6137 | 231 | 9.078   | 159 | 5.9994 | 192 | VicK      | 562.4 | -    | 50    | 3 |
| 10 |    | 6.0155 | 357 | 8.5172 | 101 | 10.0246 | 58  | 5.3371 | 359 | VicK      | 502.6 | -    | 100   | 3 |
| 11 |    | 6.0603 | 342 | 7.1185 | 334 | 8.4564  | 268 | 5.8769 | 214 | VicK      | >1000 | -    | 100   | 3 |
| 12 |    | 7.7916 | 61  | 7.3906 | 277 | 8.6092  | 234 | 5.7907 | 235 | VicK      | 598.1 | -    | >1000 | 3 |
| 13 |   | 5.2888 | 546 | 4.6756 | 896 | 7.8139  | 405 | 4.9899 | 460 | VicK      | 32.60 | -    | 0.28  | 3 |
| 14 |  | 5.3948 | 516 | 3.9942 | 978 | 6.3423  | 786 | 4.4055 | 630 | YycG      | 48    | -    | 50    | 4 |
| 15 |  | 5.2857 | 547 | 8.0385 | 167 | 10.4673 | 31  | 5.1475 | 414 | YycG      | 29    | -    | 25    | 4 |

|    |                                                                                     |        |     |        |     |         |      |        |     |           |      |   |      |              |
|----|-------------------------------------------------------------------------------------|--------|-----|--------|-----|---------|------|--------|-----|-----------|------|---|------|--------------|
| 16 | 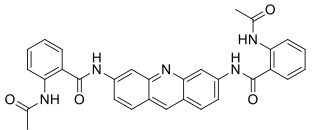   | 5.5479 | 478 | 6.6358 | 439 | 6.5453  | 733  | 5.3259 | 366 | YycG      | 15   | - | 12.5 | <sup>4</sup> |
| 17 |    | 7.6617 | 73  | 7.7787 | 203 | 11.8361 | 4    | 6.8505 | 74  | YycG      | 13.5 | - | 12.5 | <sup>4</sup> |
| 18 |    | 7.0096 | 157 | 7.7609 | 207 | 10.9232 | 16   | 7.8013 | 14  | YycG      | 14   | - | 6.25 | <sup>4</sup> |
| 19 |    | 5.3834 | 521 | 4.8536 | 844 | 6.5453  | 733  | 4.3176 | 665 | YycG      | >200 | - | 100  | <sup>4</sup> |
| 20 |   | 7.1043 | 134 | 8.9119 | 64  | 10.6944 | 21   | 5.863  | 220 | YycG      | 6.5  | - | 0.2  | <sup>4</sup> |
| 21 |  | 6.2702 | 292 | 7.1734 | 324 | 4.793   | 1002 | 4.787  | 515 | HpKA-DrrA | 0.41 | - | -    | <sup>5</sup> |
| 22 |  | 7.0299 | 153 | 8.2833 | 133 | 8.9824  | 171  | 4.1039 | 737 | YycG      | 76.5 | - | 25   | <sup>6</sup> |

|    |                                                                                     |        |      |         |      |         |      |        |     |                                                 |     |     |        |                 |
|----|-------------------------------------------------------------------------------------|--------|------|---------|------|---------|------|--------|-----|-------------------------------------------------|-----|-----|--------|-----------------|
| 23 | 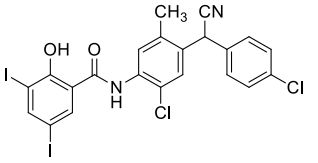   | 3.0818 | 1006 | 4.2318  | 953  | 6.3662  | 779  | 4.0584 | 750 | KinA-Spo0F                                      | 3.8 | 3.8 | 1      | <sup>7,8</sup>  |
| 24 |    | 2.911  | 1017 | 1.7244  | 1045 | 4.4539  | 1019 | 3.8547 | 805 | KinA-Spo0F                                      | 45  | 45  | 0.5    | <sup>8</sup>    |
| 25 |    | 4.3917 | 823  | 4.9325  | 832  | 4.9996  | 986  | 4.3085 | 667 | KinA-Spo0F                                      | 25  | 25  | 0.25-1 | <sup>9</sup>    |
| 26 |    | 8.6015 | 23   | 9.6129  | 30   | 10.2441 | 46   | 8.0292 | 8   | KinA-Spo0F<br>NR <sub>ii</sub> -NR <sub>i</sub> | 18  | 17  | 2      |                 |
| 27 |    | 8.4203 | 28   | 9.6948  | 26   | 9.8122  | 75   | 7.329  | 41  | KinA-Spo0F                                      | 20  | 20  | 1-8    | <sup>10</sup>   |
| 28 |   | 7.1628 | 120  | 8.1661  | 150  | 8.7985  | 201  | 5.3119 | 371 | KinA-Spo0F                                      | 14  | 14  | 2-16   | <sup>10</sup>   |
| 29 |  | 7.3131 | 105  | 9.7372  | 24   | 10.1496 | 50   | 8.5535 | 4   | KinA-Spo0F                                      | 500 | 500 | >32    | <sup>10</sup>   |
| 30 |  | 8.8116 | 17   | 11.9226 | 1    | 10.1188 | 51   | 8.0015 | 10  | KinA-Spo0F                                      | 1.6 | 1.6 | 1-2    | <sup>7,10</sup> |

|    |                                                                                     |        |      |         |      |         |      |        |     |                                                 |                       |                                          |      |    |
|----|-------------------------------------------------------------------------------------|--------|------|---------|------|---------|------|--------|-----|-------------------------------------------------|-----------------------|------------------------------------------|------|----|
| 31 | 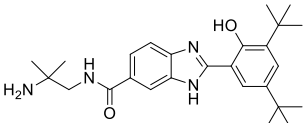   | 2.0797 | 1041 | 5.9444  | 605  | 7.6126  | 453  | 3.7753 | 824 | KinA-NR <sub>II</sub>                           | 10                    | 13                                       | 2    | 7  |
| 32 |    | 2.8973 | 1018 | 2.4744  | 1043 | 3.8343  | 1033 | 3.5477 | 871 | KinA-NR <sub>II</sub>                           | 4                     | 23                                       | 2    | 7  |
| 33 |    | 9.1179 | 15   | 11.8906 | 2    | 12.2995 | 2    | 7.9565 | 12  | KinA-NR <sub>II</sub>                           | 13                    | 37                                       | 1-2  | 7  |
| 34 |    | 7.1542 | 122  | 7.7735  | 206  | 7.1523  | 570  | 6.3414 | 135 | KinA-NR <sub>II</sub>                           | -                     | -                                        | 1-2  | 11 |
| 35 |    | 5.7593 | 419  | 6.5629  | 463  | 7.4925  | 479  | 6.5575 | 109 | KinA-NR <sub>II</sub>                           | 1.6                   | 1.6                                      | 2-4  | 11 |
| 36 |  | 9.675  | 8    | 8.4989  | 103  | 10.0395 | 57   | 5.4886 | 317 | NR <sub>I</sub> -NR <sub>II</sub><br>KinA-Spo0F | 2.2<br>KinA-<br>Spo0F | 5.0<br>NR <sub>I</sub> -NR <sub>II</sub> | 4.0  | 12 |
| 37 |  | 6.1775 | 314  | 7.6961  | 218  | 10.9788 | 15   | 6.7903 | 80  | HprK/P                                          | -                     | -                                        | -    | 13 |
| 38 |  | 4.0165 | 896  | 5.0779  | 797  | 6.0328  | 845  | 3.5474 | 872 | NR <sub>II</sub>                                | 20                    | 1.6                                      | 0.78 | 14 |

|    |                                                                                     |         |      |        |      |         |     |        |     |           |         |       |        |    |
|----|-------------------------------------------------------------------------------------|---------|------|--------|------|---------|-----|--------|-----|-----------|---------|-------|--------|----|
| 41 | 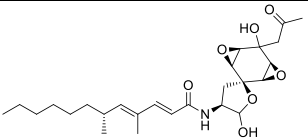   | 10.6889 | 2    | 9.8774 | 21   | 10.2665 | 43  | 6.2297 | 159 | YycF-YycG | 211-232 | -     | 15.3   | 15 |
| 42 |    | 8.1599  | 37   | 7.6784 | 221  | 10.0723 | 54  | 5.9517 | 197 | YycF-YycG | 43.9    | -     | 25     | 16 |
| 43 |    | 2.5472  | 1031 | 3.3949 | 1026 | 5.8565  | 876 | 5.0749 | 431 | SF-EnvZc  | 70.17   | 70.17 | 12.5   | 11 |
| 44 |    | 5.5586  | 475  | 6.5012 | 479  | 9.15    | 147 | 4.2241 | 695 | SF-EnvZc  | 10.18   | 10.18 | 12.5   | 11 |
| 45 |    | 6.5939  | 222  | 8.2712 | 136  | 10.0048 | 60  | 5.1254 | 418 | SF-EnvZc  | 10.2    | 10.2  | -      | 11 |
| 46 |   | 6.2265  | 301  | 6.1311 | 558  | 9.9799  | 63  | 4.8146 | 500 | YycF-YycG | -       | -     | 25-100 | 17 |
| 47 |  | 6.501   | 241  | 8.0366 | 168  | 8.331   | 295 | 5.7463 | 251 | YycF-YycG | -       | -     | 25-100 | 17 |



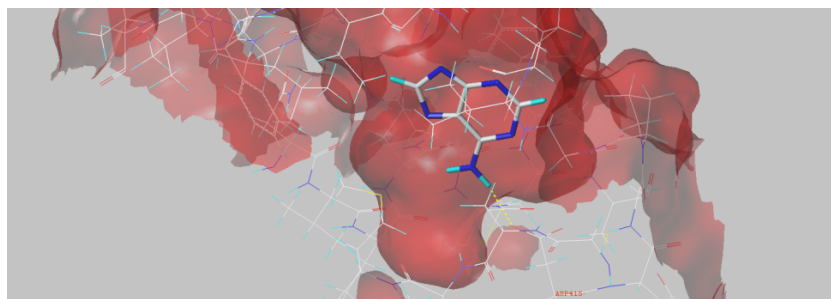

**Fig. S1** The fragment-guided docking approach in Surflex. A portion of the co-crystallized ligand (shown with the adenine moiety in the receptor PhoQ, PDB: 1ID0) is retained and utilized to guide the placement of compounds in the active site.

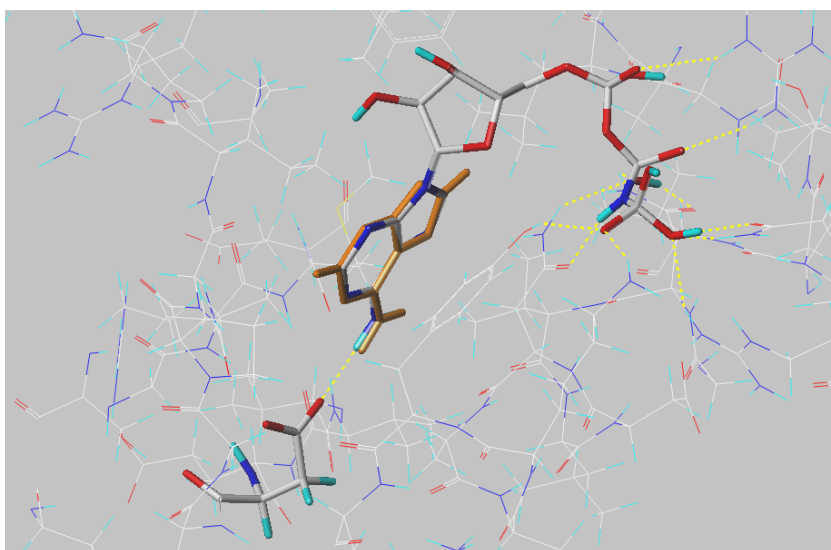

**Fig. S2** The docked conformation of AMP-PNP in the active site of PhoQ superimposed with the adenine moiety (orange) of the co-crystallized structure. The computed RMSD between these two moieties was 0.108.

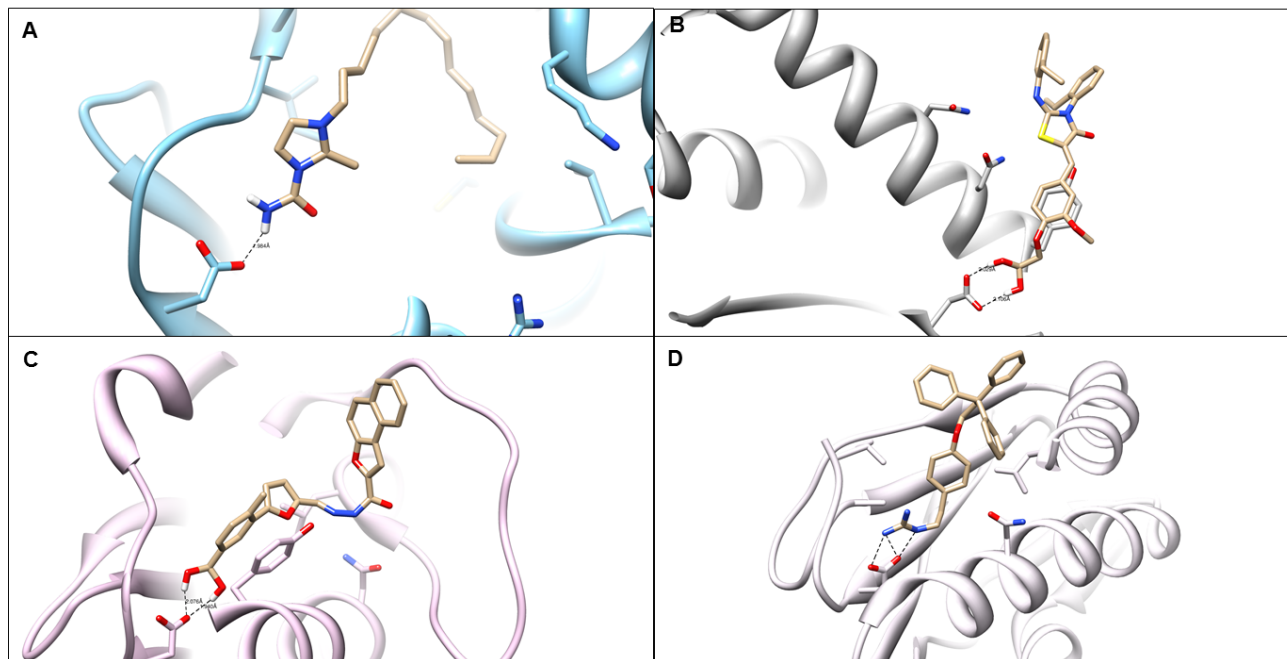

**Fig. S3** Predicted binding poses of selected TCS inhibitors in the nucleotide-binding region of HKs. Some portions of the protein have been cut away for clarity. (A) Compound **4** interacting with Asp449 in receptor 1I58. (B) The interaction of compound **15** with Asp411 in receptor 2C2A. (C) Asp415 interacting with inhibitor **20** in receptor 1ID0. (D) Salt-bridge interaction formed between inhibitor **30** and Asp416 of 3CGY.

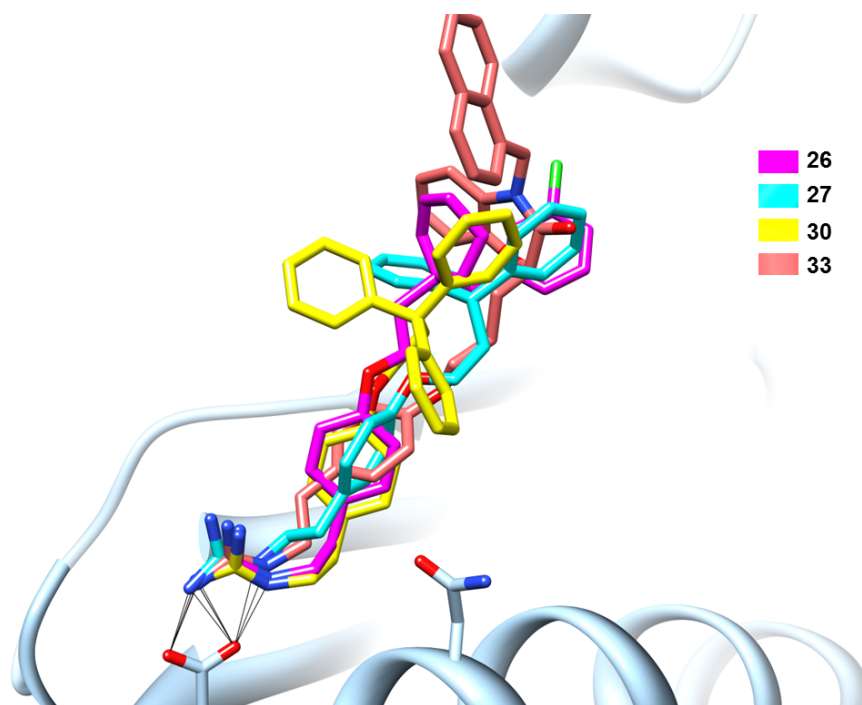

**Fig. S4** Cluster of guanidine-bearing compounds (**26**, **27**, **30**, **33**) and their corresponding interactions with Asp416 of PhoQ (3CGY; *E. coli*).

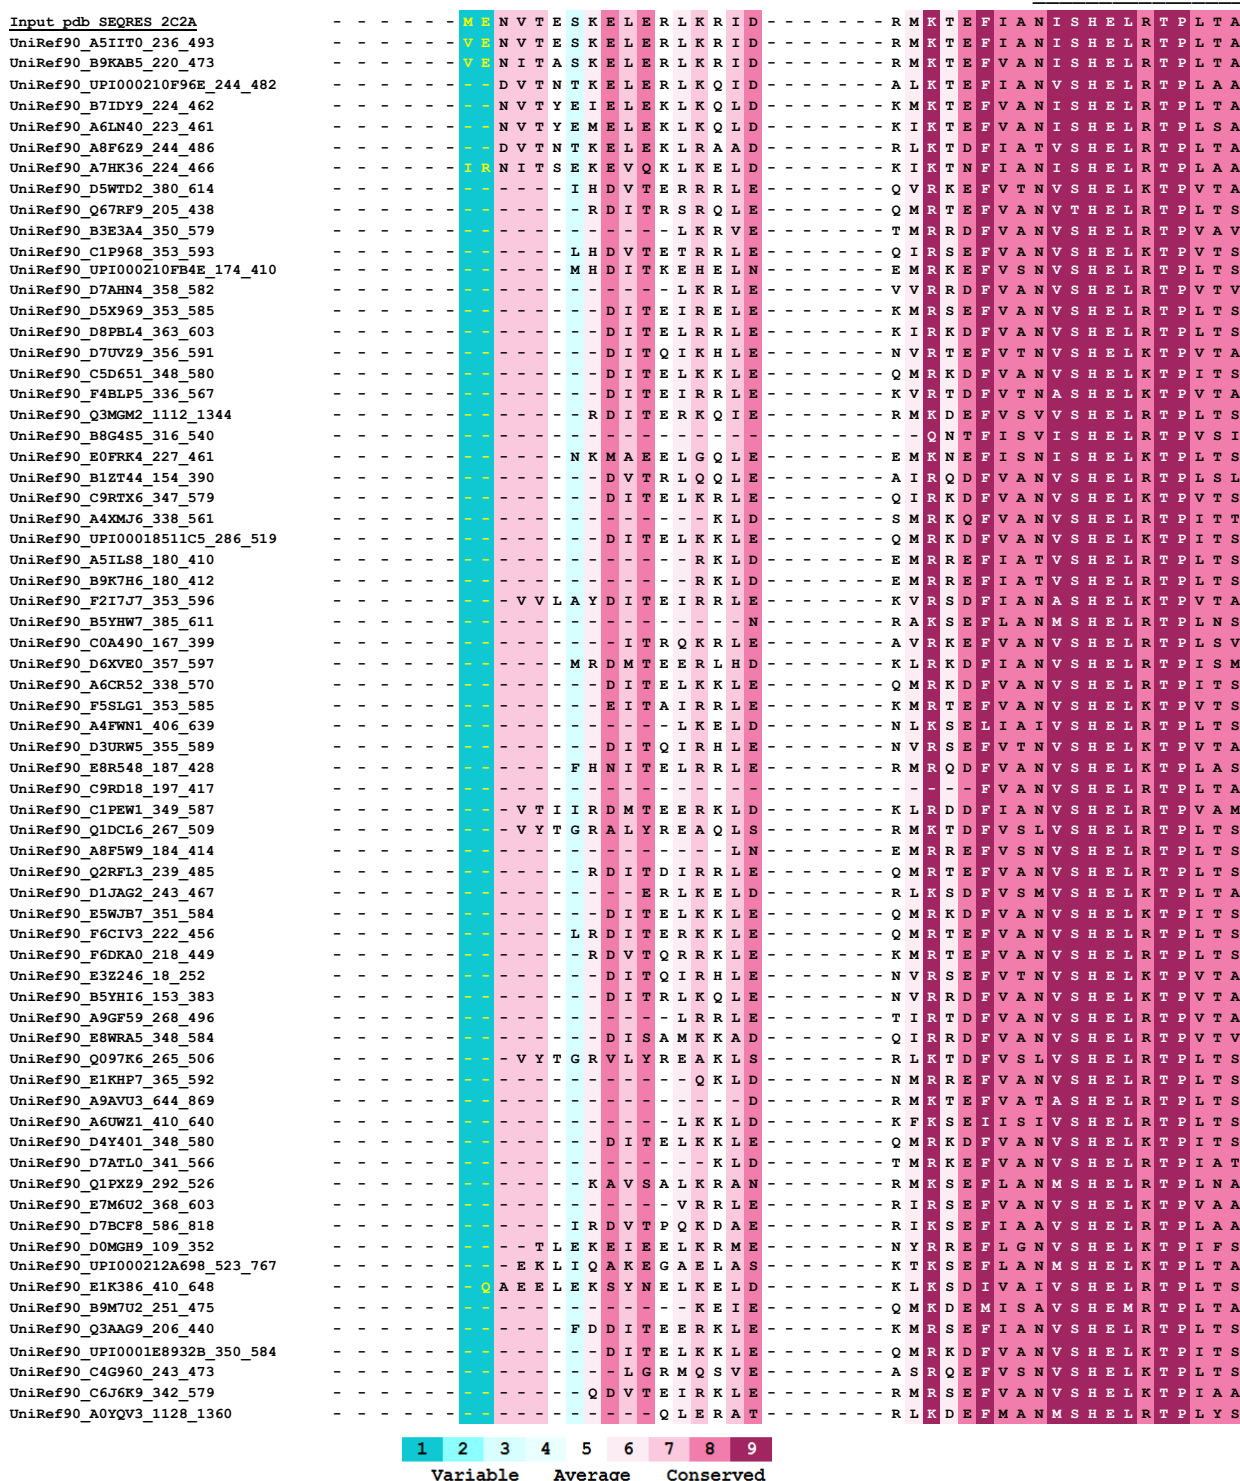

**Fig. S5** The complete multiple sequence alignment (MSA) of HK homologs retrieved from the UniProt database and aligned using the ConSurf Protein database.<sup>18</sup> Highly-conserved active site residues are outlined in red and indicated by a red arrow (Asn found in N Box region, Asp found in G1 box region, Leu found in G2 box).

```

UniRef90_E3PT03_185_421 - - - - - I E D I T E R I K L E - - - - - T I R S D F V A N V T H E L K T P L T S
UniRef90_B7GU1_348_587 - - - - - D I T E L K K L E - - - - - Q M R R K D F V A N V S H E L K T P I T S
UniRef90_Q39S62_358_588 - - - - - - - L T R L E - - - - - N I R R R D F V A N V S H E L R T P V T V
UniRef90_B8DOH3_363_592 - - - - - - - L R R L E - - - - - Q L R R K E F V A N V S H E L K T P L T S
UniRef90_F5L948_225_461 - - - - - D I T Q L K K L E - - - - - R I R Q D F V A N V S H E L K T P I T S
UniRef90_E0NJE3_365_590 - - - - - - - R L D - - - - - V M R R R E F V A N V S H E L K T P I T T
UniRef90_A7I127_682_911 - - - - - - - Q L R T L D - - - - - E L K D D F V S S V T H E L R T P L T A
UniRef90_B9DNB3_332_557 - - - - - D I T S L K K L E - - - - - N L R R E F V A N V S H E L K T P I T S
UniRef90_A7HN49_181_412 - - - - - - - K Q L D - - - - - K L R R E F I S N V S H E L R T P L T S
UniRef90_E6QIY0_358_593 - - - - - - - R R L E - - - - - R M K D E F V S T V S H E L R T P L T S
UniRef90_F4L5H3_895_1123 - - - - - - - E R L Q Q V D - - - - - K L K D Q F L A N T S H E L R T P L Q G
UniRef90_A9AUY3_448_692 - - - - - I E D V T R E R E I D - - - - - K M K N E F V S V V S H E L R T P L T S
UniRef90_Q1IKU6_785_1018 - - - - - Q D V T K R R E V D - - - - - R M K N E F I S V V S H E L R T P L T S
UniRef90_B5YD58_456_687 - - - - - R D I S L A K E L D - - - - - R M K S E F V A N V S H E L K T P L T A
UniRef90_UPI00016BFB3D_364_592 - - - - - M Q D V T S Q Q K L D - - - - - Q M R R K D F V A N V S H E L R T P L T T
UniRef90_E8SIU9_335_566 - - - - - D I T Q L K K L E - - - - - N L R S E F V A N V S H E L K T P I T S
UniRef90_B9E797_336_561 - - - - - D I T Q L K I L E - - - - - Q M R K D F V A N V S H E L K T P I T S
UniRef90_Q8EPE4_222_453 - - - - - D I T E L K K L E - - - - - K M R K D F V A N V S H E L R T P I T S
UniRef90_D5DL55_355_590 - - - - - R D M S E E R K L D - - - - - K S R K D F I A N V S H E L R T P I S M
UniRef90_E0HX50_173_410 - - - - - L R D I T K E K E V E - - - - - A M R R D F V A N V S H E L R T P L T S
UniRef90_B8DZU7_455_686 - - - - - R D I S L A K E L D - - - - - R M K S E F V A N V S H E L K T P L T A
UniRef90_D6GSX7_369_596 - - - - - - - E R L D - - - - - H M R K E F V A N V S H E L K T P I T T
UniRef90_D7CLL1_123_351 - - - - - - - R K F D - - - - - Q M R S E F V A N V S H E L R T P L T A
UniRef90_Q6LXP6_406_633 - - - - - - - L K E L D - - - - - K L K S E L I A V V S H E L R T P L T S
UniRef90_Q67LR3_257_496 - - - - - R D I T K E T E L D - - - - - R M K T E F I A T V S H E L R T P M T S
UniRef90_A6LP23_177_414 - - - - - L H D V T Q E R I L E - - - - - N A R K E F I S N V S H E L R T P L T S
UniRef90_B1HWE4_263_498 - - - - - M H D I T E L V R L E - - - - - Q I R K D F V A N V S H E L R T P I T S
UniRef90_Q2BZH9_351_585 - - - - - D I T E L K K L E - - - - - Q M R K D F V A N V S H E L K T P I T S
UniRef90_B8FA30_356_583 - - - - - D M T Q V T K L E - - - - - N M R R D F V A N V S H E I K T P I T A
UniRef90_B5YJF0_360_619 - - - - - R D I T Q E K E V D - - - - - R L K T E F I T V S H E L R T P L T S
UniRef90_F0JJO_240_468 - - - - - - - R L R R E - - - - - R M R A D F V A M L S H E I R T P L T S
UniRef90_E1KHE7_585_832 - I T E H K E I E S M L I E T N N K L K E L D - - - - - Q A K T D F F S N V S H E L R T P L T I
UniRef90_C9LCS1_237_475 - - - - - N K M L K K M K V L D - - - - - D S R Q E F V A N V S H E L K T P M T S
UniRef90_B7IEX9_176_421 - - - - - L H D V T Q E R V L E - - - - - N V R K E F I S N V S H E L R T P L T S
UniRef90_Q8TMU8_474_720 - I T E R K N Y E I E L F R A K Q D A E V A N - - - - - R A K S A F L A N M S H E L R T P L N S
UniRef90_Q71Y67_354_593 - - - - - R D M T E E K Q L E - - - - - K M K S D F V N N V S H E L R T P I S M
UniRef90_D5DMV7_352_585 - - - - - D I T E L K K L E - - - - - Q V R R D F V A N V S H E L K T P I T S
UniRef90_A5D189_222_456 - - - - - L R D I T E R K I L Q - - - - - E M R S E F V A N V S H E L R T P L T S
UniRef90_C027X8_357_585 - - - - - - - I R R L E - - - - - K M R S E F V A N V S H E L R T P I T S
UniRef90_D4TMU3_804_1043 - - - - - R D I T E R K Q V E - - - - - K M K D E F V S V S H E L R T P L T S
UniRef90_Q0WQ5_299_531 - - - - - E R L K S L D - - - - - R M K M E F F T L I S H E L R T P L T T
UniRef90_B9E6M6_350_585 - - - - - - - K K I D - - - - - Q M K Q M F I A N V S H E L R T P I Q M
UniRef90_UPI000212C3B1_361_596 - - - - - - - V R R L E - - - - - R M R S E F V A N V S H E L K T P I A A
UniRef90_A6UPU7_401_631 - - - - - - - E B L K E L D - - - - - N L K S D L I A I V S H E L R T P L T S
UniRef90_A5UQE0_447_687 - - - - - S D V T R E R E A D - - - - - R L K S E F L S I I S H E L R T P L T S
UniRef90_A1HSJ7_400_654 D I T E H K Q L E V K L T E A L A A A E A A N - - - - - Q A K D Q F L A A M S H E L R T P L N A
UniRef90_F2JII5_342_577 - - - - - Q D V T K Q Q K L D - - - - - Q M R K E F V A N V S H E L R T P L T T
UniRef90_Q8R6U6_339_575 - - - - - M H D I T E Q H K L D - - - - - Q M R K E F V A N V S H E L R T P L A T
UniRef90_Q8PT37_279_503 - - - - - - - - - - - N - - - - - R S M S E F L A T M S H E L R T P L T A
UniRef90_D8GS6_939_1165 - - - - - - - K Q I E - - - - - R M K D E F I S I V S H E L R T P L T S
UniRef90_A8FJB5_372_608 - - - - - - - E K I D - - - - - A E R R E F V A N V S H E L R T P L T T
UniRef90_A5ITL6_318_551 - - - - - M H D I T N L K Q L E - - - - - N L R R E F V A N V S H E L K T P I T S
UniRef90_F6B3A9_217_450 - - - - - L R D I T E R K L E - - - - - R M R T E F V A N V S H E L R T P L T S
UniRef90_D9QVY1_356_592 - - - - - R D V T E L R R L E - - - - - Q I R T E F V S N V S H E L R T P L T S
UniRef90_A9AA11_406_633 - - - - - - - L K E L D - - - - - N L K S E L I A I V S H E L R T P L T S
UniRef90_D5E8Z5_365_588 - - - - - - - E Q A N - - - - - R T K S E F L A N M S H E L R T P L N S
UniRef90_D2QCT5_672_903 - - - - - - - E R L K Q S D - - - - - E Q K D D F V S T V T H E I R T P L T S
UniRef90_A3DHV5_362_596 - - - - - L H D I T E Q Q K L E - - - - - N M R K E F V A N V S H E L R T P L T S
UniRef90_B0ADS6_194_431 - - - - - I E D I T E L V K L E - - - - - N M R K D F V A N V S H E L K T P L T S
UniRef90_E7RC70_372_606 - - - - - - - E K I D - - - - - I E R R E F V A N V S H E L R T P L T T
UniRef90_A0B593_141_369 - - - - - - - L K E L D - - - - - S I K S E F V S M V S H E L R T P L T V
UniRef90_D4IVS0_239_469 - - - - - I K K L Q A I D - - - - - Q S R Q E F V S N V S H E L K T P L T S
UniRef90_B1YMQ3_615_835 - - - - - - - - - - - D - - - - - R M K E E F V S T V S H E L R T P L S S
UniRef90_C1F3B6_554_791 - - - - - Q D I T E R Q R L D - - - - - R M K D E F I S T V S H E L R T P L T S
UniRef90_E7RJVO_231_462 - - - - - Q D I T E L K K L E - - - - - Q I R K D F V A N V S H E L R T P V T S
UniRef90_D3UFQ2_354_596 - - - - - R D M T E E K Q L E - - - - - K M K S D F V N N V S H E L R T P I S M
UniRef90_E0RD24_357_594 - - - - - Q D I T A I R R L E - - - - - N M R S E F V A N V S H E L K T P I A A
UniRef90_F4LRR4_346_580 - - - - - R D I T D L R K L E - - - - - K V R T E F V A N I S H E L K T P L T S
UniRef90_Q7NDS1_97_331 - - - - - - - Q E L D - - - - - Q A Q T D D F V S T V S H E L R T P L T S
UniRef90_Q647M8_182_410 - - - - - - - L E E V T - - - - - R M K T D F L S I T S H E L R T P L T P
UniRef90_B8GG61_479_712 - - - - - - - - - - - D - - - - - R L K D E F I G I V S H E L R T P L T S
UniRef90_B7GK3_359_585 - - - - - - - R R L D - - - - - K L R K D F I A N V S H E L R T P I A M
UniRef90_C1DVW6_110_330 - - - - - - - - - - - - - - - - Q A K K D F V S N V S H E L K T P I S V
UniRef90_C4L472_342_574 - - - - - - - - - - - - - - - - K M R K D F V A N V S H E L K T P L T S
UniRef90_D7GFR0_250_485 - - - - - T I N K T L E K L K A V D - - - - - Q S R Q E F V S N V S H E L K T P I T S
UniRef90_B4S8R4_490_736 - - - - - F R D I T E Q K K E R L I K E N I R L K N D F I A N V S H E L R S P L F S
UniRef90_A5GAH6_406_635 - - - - - D I T E R K E M E - - - - - Q M K D E M I S A V S H E M R T P L T A
UniRef90_C6WZ9_504_741 - - - - - V G T S T D I D M K R Q E - - - - - Q Q K D D F I K M A S H E L K T P V T T
UniRef90_B0TGE0_245_473 - - - - - - - V R R L E - - - - - Q M R T E F V A N V S H E L R T P L T S
UniRef90_D5E978_387_612 - - - - - - - - - - - V K - - - - - T K T E F I A T M S H E L R T P L N A
UniRef90_F5LRU7_361_595 - - - - - - - M R R L E - - - - - R M R S E F V A N V S H E L K T P I A A
UniRef90_Q4A159_364_598 - - - - - L H D V T E Q Q Q V E - - - - - R E R R E F V A N V S H E L R T P L T S

```

H Box

```

Input_pdb_SEQRES_2C2A
UniRef90_A5IIT0_236_493
UniRef90_B9KAB5_220_473
UniRef90_UPI000210F96E_244_482
UniRef90_B7IDY9_224_462
UniRef90_A6LN40_223_461
UniRef90_A8F6Z9_244_486
UniRef90_A7HK36_224_466
UniRef90_D5WTD2_380_614
UniRef90_Q67RF9_205_438
UniRef90_B3E3A4_350_579
UniRef90_C1P968_353_593
UniRef90_UPI000210FB4E_174_410
UniRef90_D7AHN4_358_582
UniRef90_D5X969_353_585
UniRef90_D8PBL4_363_603
UniRef90_D7UVZ9_356_591
UniRef90_C5D651_348_580
UniRef90_F4BLP5_336_567
UniRef90_Q3MG2_1112_1344
UniRef90_B8G4S5_316_540
UniRef90_E0FRK4_227_461
UniRef90_B1ZT44_154_390
UniRef90_C9RTX6_347_579
UniRef90_A4XMJ6_338_561
UniRef90_UPI00018511C5_286_519
UniRef90_A5ILS8_180_410
UniRef90_B9K7H6_180_412
UniRef90_F217J7_353_596
UniRef90_B5YHW7_385_611
UniRef90_C0A490_167_399
UniRef90_D6XVE0_357_597
UniRef90_A6CR52_338_570
UniRef90_F5SLG1_353_585
UniRef90_A4FWN1_406_639
UniRef90_D3URW5_355_589
UniRef90_E8R548_187_428
UniRef90_C9RD18_197_417
UniRef90_C1PEW1_349_587
UniRef90_Q1DCL6_267_509
UniRef90_A8F5W9_184_414
UniRef90_Q2RFL3_239_485
UniRef90_D1JAG2_243_467
UniRef90_E5WJB7_351_584
UniRef90_F6CIV3_222_456
UniRef90_F6DKA0_218_449
UniRef90_E3Z246_18_252
UniRef90_B5YHI6_153_383
UniRef90_A9GF59_268_496
UniRef90_E8WRA5_348_584
UniRef90_Q097K6_265_506
UniRef90_E1KHP7_365_592
UniRef90_A9AVU3_644_869
UniRef90_A6UWZ1_410_640
UniRef90_D4Y401_348_580
UniRef90_D7ATL0_341_566
UniRef90_Q1PXZ9_292_526
UniRef90_E7M6U2_368_603
UniRef90_D7BCF8_586_818
UniRef90_D0MGH9_109_352
UniRef90_UPI000212A698_523_767
UniRef90_E1K386_410_648
UniRef90_B9M7U2_251_475
UniRef90_Q3AAG9_206_440
UniRef90_UPI0001E8932B_350_584
UniRef90_C4G960_243_473
UniRef90_C6J6K9_342_579
UniRef90_A0YQV3_1128_1360

```

```

I K A Y A E T I Y N S L - - - - - G E L D L S T L K E F L E V I I D Q S N H L E N
I K A Y A E T I Y N T L - - - - - E E L D L D G T L K E F L E V I M D Q S S H L E N
I K A Y T E T M Y N S L - - - - - E E L D T D T L K E F L E V V L D Q S N H L E N
I R A Y V E T I L N S L - - - - - D E L N K K T M L K D F M K T V F D E T L H L E N
I K A Y T E T L L N M E - - - - - - V D R E S Q R E F L E T V Y E Q S E R L E S
V K A Y T E T L L N M E - - - - - - I D P E S Q K E F L S I I Y E Q S E R L E S
I K A Y T E T I L A D P - - - - - E S M D K F T L T G F L Q I V Y K E S L H L E S
I K A Y V E T M L N M P - - - - - - M S Q E E I H K E F L D V V Y S Q S I R L E E
I C G L A E T V V E E D - - - - - L A - - P E E R R H F L E L I H R E A R R L E Q
I Q G F A E T L L E G A - - - - - L D - E P E T A R H F V E I M L R E S R H L G A
I K G Y G E A L A L D G A - - - - - L E E S P E R S R R F V E I I V S H A E R L T N
V K G F A E T L L D G A - - - - - M Y - D E A T L R E F L K I I Y D E S D R L H R
I H G Y A E T L L N D P - - - - - D I - D P E T R Q R F L S I I E N E A A R M T R
I K G Y A E A L A G G L - - - - - V E E D P E R A G R F L E I I C S H E R L A D
I K G F V E T L L D G A - - - - - M E - D R E V A R R F L E I I N V E T N R L S R
I K G Y V E A L L D G G - - - - - K D - E P A T A T A F L E I I M R Q S N R L N L
L K G F A E T L L D G A - - - - - M Y - D E A L L K K F L G I M K D E S D R L H R
I K G F A E T L L D G A - - - - - M K - D E Q T L E Y F L S I I W K E S E R L Q T
L K G F S E T L L D G A - - - - - M E - D K E V L K Q F L E I M L R E S S R L D G
I H G S L G M L A S G L - - - - - L P A D S E Q Q R R L L E I A T D S T E R L V R
I K G F A E T M L R P D - - - - - G Q F T V E Q Y R E A L Q V I G E A D R L A R
I K G F A I T A M D L V - - - - - - E K N S E L Y E L N I I D E E T D R L S R
I K S A A E T L L D G G - - - - - K N - D P A V N A R F L E I I D K H A N R L S L
I K G F A E T L L D G A - - - - - M K - D E A A L E H F L T I I L K E S E R L Q T
I K T Y S E T L L D - - - - - V D - N E E T K K Q F L S V I I K E C D R M T R
I K G F S E T L L D G A - - - - - L E - D R D T L E Y F L N I M L T E S D R L Q S
I H G Y A E T L L E D D - - - - - L E - D K E L V K R F L K I I E E S A R M T R
I H G Y A E T L L E D D - - - - - L E - N K E L V K R F L K I I E E S A R M T H
L K G F T E T L L D G A - - - - - L E - D E D T A R E F V E I M N R E A N R L G F
I I G F T E V L Q D Q G - - - - - F G T L N E K Q L E Y L K D I H D S A K H L L N
I K G Y A E T L I D G L - - - - - P D M P P A Q R D R F L H I I R R H T R L N T
L Q G Y S E A I I D D V - - - - - A G - S D E E K K E L A Q I I Y D E S L R M G R
I K G F S E T L L D G A - - - - - M N - D K E T L E M F L N I I L R E S D R L Q S
L R F G F A E T L L D G A - - - - - A E - D P D M R K E F L E I I Q A E S R L R E R
I K G Y V E L V L D G T - - - - - M G A I N D S Q R K C L Q V A D D N I V R L R R
L K G F A E T L L D G A - - - - - M Y - D E A L L K K F L T I I K E E S D R L H R
I R A Y A D S L D L D W A - - - - - L E - D P E I T T R F V S Q I D E Q A E R L D V
I K G F V E A L E D G A - - - - - L E - D R E T A Q E F L Q I I A S E T E R L I H
L Q G Y S E A I I D D I - - - - - A A - S E E E K K E F A K I I Y D E T L R I G R
I R M F I E T L A L G R - - - - - L K - D P A Q T Q E V L T L L M R E T E R L S I
I H G Y A E T L L N D P - - - - - D M - D A E T R D R F L K I I E N E S A R M S R
I R G F V E T L L E G A - - - - - L E - D P E V S R R F L G I I N H E A Q I Q Q
M R T S A Q V L E A A G - - - - - - I A T E T R K E M L D I I L R N I D R Q T N
I K G F S E T L L D G A - - - - - M E - D K Q A L N D F L S I I L K E S D R L Q S
I K G F L E T L L D G A - - - - - M N - D P K T S R Q F L E I M S Q E T E R L T R
I N G F M E T L L D G A - - - - - I D - D P V I A R R F L E I M N T E S N R L S R
L K G F A E T L L D G A - - - - - M Y - D E M L L K K F L T I I K E E S D R L H R
I K G Y A E T L L D G A - - - - - I N - D K N E S K K F I E I I K N Q A D R L N A
I S T A A E T L Q L G A - - - - - L K - D P H E G A A E F V D V I D R H A K R L R H
I K G Y A E T L L S G D - - - - - L A D D P G R R D R F L G I I Q N H A D R L S D
I R M F I E T L A L G R - - - - - L K - D P A Q T Q E V L Q L L S R E T E R L S A
I K S Y S E T L M D G A - - - - - L E - D K E T A Y R F L N V I N S E A D R M T R
I S G Y I D L L M L N T - - - - - L G P L T E Q Q R Q F L S V V K N N I E R L N A
I K G Y V E L V L D G T - - - - - M G T I N E S Q K R C L E I A N E N I D R L K R
I K G F A E T L L D G A - - - - - M K - D E R T L E H F L S I I W K E S E R L Q T
I K S Y V E T L L Y S D - - - - - V - D A E Y S K K F L K I I D S E T D R M T R
I I G F A E V L K D K L - - - - - C G E L N A E Q E D F V K D I H S S G R H L L Q
V K G F A E T L M A G A - - - - - L E - D K E M A R S F L Q I I Y D E S D R L N R
I M G F A E L L T S G E - - - - - - I P L E E G R E F L R I I Y D N G R L K N
I R G F T E T L L E A D - - - - - P G - D E A T R G A F L E K I I L R N A D R L A N
I I G F S E L L N T R M - - - - - F G E L N E K Q L G F V E Y I I K N G N H L L E
I K G Y V E L V L D G T - - - - - M G A I T E S Q K K C L E I A N K N I D R L K R
M L G F T E Y L L E N E - - - - - - V D P S Q L K N Y L N T I Y K E T A R L K E
I K G F L E T L L D G A - - - - - L E - D K T I A K H F L Q I M N S E T E R L T R
I K G F S E T L L D G A - - - - - M N - D K D T L E Y F L S I I L K E S D R L Q S
M V L A D S I N S M E - - - - - G A - P L E L Y Q E F M Q D M S H E I D R E T K
V K G F A E T L L A G G - - - - - V K - D E E T T R S F L Q I I Y D E G D R L N R
I L G L S E V L Q Q E V - - - - - Y G V L N A E Q L R S L S T I E Q S G Q H L L E

```

UniRef90\_E3PT03\_185\_421  
 UniRef90\_B7GGU1\_348\_587  
 UniRef90\_Q39S62\_358\_588  
 UniRef90\_B8DOH3\_363\_592  
 UniRef90\_F5L948\_225\_461  
 UniRef90\_E0NJE3\_365\_590  
 UniRef90\_A7II27\_682\_911  
 UniRef90\_B9DNB3\_332\_557  
 UniRef90\_A7HN49\_181\_412  
 UniRef90\_E6QIY0\_358\_593  
 UniRef90\_F4L5H3\_895\_1123  
 UniRef90\_A9AU3\_448\_692  
 UniRef90\_Q1IKU6\_785\_1018  
 UniRef90\_B5YD58\_456\_687  
 UniRef90\_UPI00016BFB3D\_364\_592  
 UniRef90\_E8SIU9\_335\_566  
 UniRef90\_B9E797\_336\_561  
 UniRef90\_Q8EPE4\_222\_453  
 UniRef90\_D5DL55\_355\_590  
 UniRef90\_E0HX50\_173\_410  
 UniRef90\_B8DZU7\_455\_686  
 UniRef90\_D6GSX7\_369\_596  
 UniRef90\_D7CLL1\_123\_351  
 UniRef90\_Q6LXP6\_406\_633  
 UniRef90\_Q67LR3\_257\_496  
 UniRef90\_A6LP23\_177\_414  
 UniRef90\_B1HWE4\_263\_498  
 UniRef90\_Q2B2H9\_351\_585  
 UniRef90\_B8FA30\_356\_583  
 UniRef90\_B5YJPO\_360\_619  
 UniRef90\_F0JTO\_240\_468  
 UniRef90\_E1KHE7\_585\_832  
 UniRef90\_C9LCS1\_237\_475  
 UniRef90\_B7IEX9\_176\_421  
 UniRef90\_Q8TMU8\_474\_720  
 UniRef90\_Q71Y67\_354\_593  
 UniRef90\_D5DMV7\_352\_585  
 UniRef90\_A5D189\_222\_456  
 UniRef90\_C027X8\_357\_585  
 UniRef90\_D4TMU3\_804\_1043  
 UniRef90\_Q0W6Q5\_299\_531  
 UniRef90\_B9E6M6\_350\_585  
 UniRef90\_UPI000212C3B1\_361\_596  
 UniRef90\_A6UPU7\_401\_631  
 UniRef90\_A5UQE0\_447\_687  
 UniRef90\_A1HSJ7\_400\_654  
 UniRef90\_F2JII5\_342\_577  
 UniRef90\_Q8R6U6\_339\_575  
 UniRef90\_Q8PT37\_279\_503  
 UniRef90\_D8G5S6\_939\_1165  
 UniRef90\_A8FJB5\_372\_608  
 UniRef90\_A5ITL6\_318\_551  
 UniRef90\_F6B3A9\_217\_450  
 UniRef90\_D9QVY1\_356\_592  
 UniRef90\_A9AA11\_406\_633  
 UniRef90\_D5E8Z5\_365\_588  
 UniRef90\_D2QCT5\_672\_903  
 UniRef90\_A3DHV5\_362\_596  
 UniRef90\_B0ADS6\_194\_431  
 UniRef90\_E7RC70\_372\_606  
 UniRef90\_A0B593\_141\_369  
 UniRef90\_D4IVS0\_239\_469  
 UniRef90\_B1YMQ3\_615\_835  
 UniRef90\_C1F3B6\_554\_791  
 UniRef90\_E7RJVO\_231\_462  
 UniRef90\_D3UFQ2\_354\_596  
 UniRef90\_E0RD24\_357\_594  
 UniRef90\_F4LRR4\_346\_580  
 UniRef90\_Q7NDS1\_97\_331  
 UniRef90\_Q647M8\_182\_410  
 UniRef90\_B8GG61\_479\_712  
 UniRef90\_B7GKK3\_359\_585  
 UniRef90\_C1DVW6\_110\_330  
 UniRef90\_C4L472\_342\_574  
 UniRef90\_D7GFR0\_250\_485  
 UniRef90\_B4S8R4\_490\_736  
 UniRef90\_A5GAH6\_406\_635  
 UniRef90\_C6WZH9\_504\_741  
 UniRef90\_B0TGE0\_245\_473  
 UniRef90\_D5E978\_387\_612  
 UniRef90\_F5LRU7\_361\_595  
 UniRef90\_Q4A159\_364\_598

I N G F V E T L K S N A - - - - - G I - N K A M R T K F L D I I E V E S N R L Q R H  
 I K G F A E T L L D G A - - - - - M H - D A Q T L E Y F L T I I L K E S E R L Q H  
 I K G Y A E A L I D G A - - - - - M E T - D P E R A R K F V G I I L S H S E R L L A A  
 I I G Y I D T I I D N D - - - - - I K - D D T T I K R F L S I I K D E A D R L Y L  
 I K G F A E T L L D G A - - - - - M Y - K E E H L K H F L S I I H K E A E R L H R  
 I G S Y T E T M L D V D - - - - - M - - D L D S I R N F L R V I D R E N N R M A R  
 I R A L S E L M L D A P - - - - - D M E E A Q R Q E F L A I I V G E S E R L G R  
 I K G F A E T L I D G A - - - - - K N - D E N S L D E F L N I I L K E S N R I E S  
 I H G Y A E A L L D D D - - - - - L S - N K E L V R K F L G V I E S E S A R M T R  
 L R A S L G L I A S G A - - - - - L E K R P E K Q K Q M I E V A L A N S D R L I R  
 I I G L S E A L L E D E - - - - - L D - - - P E R K A N L T M V V S S G K R L N S  
 I L G Y T E L L L A R E - - - - - - - F K P V E R Q E F V Q T V Y D Q A N Q L S K  
 I R G S L G L L A G A - - - - - L R K D P E K A D R M L D I A L K N T E R L V R  
 I K G Y S E L L I K M N - - - - - - - L P P E K V R N Y Q I I Y K E S E R L T Q  
 I K T Y T E T L I S G A - - - - - I D - E K E T A L D F L S V M E K E T D R M T T  
 M K G F T E T L I D G A - - - - - K N - D E A S L D L F L N I I L K E S N R I Q S  
 I K G F T E T L L D G A - - - - - K E - D K D T L E M F L A I I L K E S N R I Q V  
 I R G F A E T L L D N N - - - - - I T - D P A T - K E F M E I I Y K E S H R L Q L  
 L Q G Y S E A I I D D I - - - - - A S - T D E E K K E I A Q V I Y D E S L R M G R  
 I H G Y A E T L A E D D - - - - - L E - D K E T V Y R F L S I I E N E S A R M T R  
 I K G Y S E L L M K M N - - - - - - - L P P E R V R N Y Q I I Y K E S E R L T Q  
 I R T Y S E T L L D G A - - - - - L K - D P A I A K K F M E V I V K E S D R M T S  
 I K G F V E T L L D G A - - - - - L E - D K L I C R R F L T I I E G E N N R L T R  
 I K G Y V E L V L D G T - - - - - M G A I N D S Q K K C L Q V A D D N I V R L R R  
 I K G A L G L V L G G A - - - - - A G D L P P E A R E L L T I A R N N T D R L I R  
 I H G Y A E A L L E D N - - - - - L D - D K E L I R R F L T I I E S E A A R M T R  
 I K G F S E T L L D G A - - - - - Y K - D E K M L I S F L E I I Y K E S N R L Q S  
 I K G F S E T L L D G A - - - - - M H - D Q A A L S A F L D I I L K E S D R L Q M  
 I K G F V E T L L D G A - - - - - L D - D K E N A K R F L E I I S R H T D R L K A  
 I L G F I E I I N K K F T E N I L P H L D M N N F R L S K A V N K I N K F I I L S E G E R I T S  
 V R E A V D L V G S G T - - - - - F G E V N E K Q K R F L D I A G Q E S E R L S D  
 I L G Q V E A V L S G Q - - - - - Y K N T L E P N S D I F K T I Q S N A L R L L K  
 I K V L A D S L A G E - - - - - D V - P V E L Y K E F M Q I I A V E I D R M T R  
 I H G Y A E A L L E D D - - - - - L E - D K E L I R K F L S I I E S E A A R M T R  
 I I G F S D L L Y E K V - - - - - Y G E L N L K Q T K A V G N I S N S G K H L L N  
 L Q G Y S E A I I D G V - - - - - A Q - S D E E V R E F A Q I I Y D E S L R I G R  
 I K G F S E T L L D G A - - - - - M E - D P Q L R Q Q F L S I I L T E S Q R M E S  
 I R G F A E T L L D G A - - - - - L E - E P D T A R R F L E I I N S E T E R L S R  
 I K G F T E T L L E G A - - - - - M Q - D E E T C R N F L Q I I S D E S E R L Y R  
 I H G S L G M L T S G L - - - - - L S T S E Q G K R L L Q I A T D S T E R L V R  
 I K G Y A E L L K D G T - - - - - L G P V N D E Q R D R L S R I D A S V D R L T G  
 L Q G Y T E A I L D G I - - - - - V S - E K S D V D E F L N I I L D E S K R L N R  
 V K G F A E T L L A G A - - - - - L N - D K E T A R S F L Q I I F D E S E R L N R  
 I K G Y V E L V L D G T - - - - - M G T I N E S Q R K C L Q V A D D N I I R L R R  
 I M G Y T E L L L A R E - - - - - - - F S P A E R R E F V Q T V Y N E A N H L Y Q  
 I M G F S E V L L D Q H - - - - - F G P L N D K Q Q V Y V N D I L D S A R H L E  
 V K S Y T E T L L D G A - - - - - I D - E K E T A M H F L G V M E K E A D R M T A  
 I K S Y V E T L L Y N D - - - - - V - D T E Y S K K F L R I E T E T D R M T R  
 I I G F S E L M L G G S - - - - - T G E F D E L N K K F L G N I S T S G K H L L S  
 I H G S L G M L A S G L - - - - - L K A D S E E G K R M L Y I A V D S T E R L V R  
 M R S Y L E A L A E G A - - - - - I G - D K E L A P R F L S V T Q N E T E R M I R  
 I K G F A E T L I D G A - - - - - K N - D A E S L D M F L N I I L K E S N R I E S  
 I N G F Y E T L L D G A - - - - - I E - D P K T A R H F L E I M N A E T K R L A N  
 I K G Y V E T L L D E R - - - - - D C - E P G V R E F L Q V I K D E T D R L E R  
 I K G Y V E L V L D G T - - - - - M G A I N D S Q K K C L Q V A D D N I V R L R R  
 I I G Y S Q I L N Q N P - - - - - S G N L D E K E L K Y S H N I L N S G E H L L E  
 I R A L S E I L H D Q A - - - - - D M D E S M R Q E F L S R V I R E T E R L S R  
 I K S Y A E T L L D G A - - - - - L E - D R E L A G K F L S V I N S E A D R M T R  
 I T G F V E T L K I N D - - - - - D I - D K N T R N H F L D I I E K E S E R L K G  
 M R S Y L E A L A N D G A - - - - - W Q - D P D L A P L F N V T Q T E T E R M I R  
 I N S Y I E M F E D G M - - - - - L G D L T D V Q K E K L Q L I R S Q T D T M I Q  
 M K V L A D S L N G S E - - - - - D V - P I E M Y K E F M V D I G D E I D R E T K  
 I Y G F T E L M L N R E - - - - - - - I D P P K Q R K Y L T I H S E T G R L T T  
 L R A A L G L I A G G A - - - - - L Q R R P E K V Q Q M F D V A I G N C D R L V R  
 I K G F S E T L L D G A - - - - - Y K - D T E T L L S F L E I M H T E S N R I E M  
 L Q G Y S E A I I D G V - - - - - A Q - S D E E V R E F A Q I I Y D E S L R I G R  
 V K G F A E T L L G G G - - - - - V K - D E E T A R S F L Q I I Y D E S E R L N R  
 I A G F V E T L L D G A - - - - - Y K - S Q D H C K Y F L C I I K Q E T D R M T R  
 I K G F V D T L L R S G - - - - - S Q L S E A Q H R R F L R I I K N Q A D R L T R  
 M K S Q L Q M L Q E G Y - - - - - M G K L D K K Q E K S I E V V L R N L T R L E N  
 I L G Y T E I L L N R Q - - - - - D L D S E S Q R E F L T V S N E A D R L H K  
 L Q G Y S E A I V D D I - - - - - A A - T D E E K K E L A K V I Y D E S L R M G R  
 L K S A V E T I E E E K - - - - - - - D P V M I K K F V N I A K K R I E Q M D H  
 I R G F S E T L L D G A - - - - - K E - V P E L R D Q F L D I I Q K E A T R M Q M  
 I R V L A D S L M G M E - - - - - D T - P K E L Y Q E F M H D I S D E I D R E S K  
 I L G F S T L L K E R - - - - - K E L D F E T T G E F L G I I H D E S K R L S S  
 M L G Y T E F M L D N E - - - - - - - V P A D Q Q R E Y L R I T L H E S E K L N E  
 I K G Y V Q L L K R T R - - - - - K D S D D K F L V N S L N T I E N Q V N N L S V  
 I K G F V E T L L D G A - - - - - L D - D T K V A R R F L S I I N E T Q R L Q R  
 I I G F S Q L L S N R - - - - - Y G N M N E K E L K Y S F S I L K G G K H L L N  
 V K G F S E T L L A G A - - - - - L D - D K E T A R S F L Q I I F D E S E R L N R  
 M N S Y I E A L E S G A - - - - - W K - D G E L A P Q F L S V T R E E T E R M I R

Input pdb SEQRES 2C2A

UniRef90\_A5IIT0\_236\_493  
UniRef90\_B9KAB5\_220\_473  
UniRef90\_UPI000210F96E\_244\_482  
UniRef90\_B7IDY9\_224\_462  
UniRef90\_A6LN40\_223\_461  
UniRef90\_A8F6Z9\_244\_486  
UniRef90\_A7HK36\_224\_466  
UniRef90\_D5WTD2\_380\_614  
UniRef90\_Q67RF9\_205\_438  
UniRef90\_B3E3A4\_350\_579  
UniRef90\_C1P968\_353\_593  
UniRef90\_UPI000210FB4E\_174\_410  
UniRef90\_D7AHN4\_358\_582  
UniRef90\_D5X969\_353\_585  
UniRef90\_D8PBL4\_363\_603  
UniRef90\_D7UVZ9\_356\_591  
UniRef90\_C5D651\_348\_580  
UniRef90\_F4BLP5\_336\_567  
UniRef90\_Q3MGM2\_1112\_1344  
UniRef90\_B8G4S5\_316\_540  
UniRef90\_E0FRK4\_227\_461  
UniRef90\_B1ZT44\_154\_390  
UniRef90\_C9RTX6\_347\_579  
UniRef90\_A4XJG6\_338\_561  
UniRef90\_UPI00018511C5\_286\_519  
UniRef90\_A5ILS8\_180\_410  
UniRef90\_B9K7H6\_180\_412  
UniRef90\_F2I7J7\_353\_596  
UniRef90\_B5YHW7\_385\_611  
UniRef90\_C0A490\_167\_399  
UniRef90\_D6XVE0\_357\_597  
UniRef90\_A6CR52\_338\_570  
UniRef90\_F5SLG1\_353\_585  
UniRef90\_A4FWN1\_406\_639  
UniRef90\_D3URW5\_355\_589  
UniRef90\_E8R548\_187\_428  
UniRef90\_C9RD18\_197\_417  
UniRef90\_C1PEW1\_349\_587  
UniRef90\_Q1DCL6\_267\_509  
UniRef90\_A8F5W9\_184\_414  
UniRef90\_Q2RFL3\_239\_485  
UniRef90\_D1JAG2\_243\_467  
UniRef90\_E5WJB7\_351\_584  
UniRef90\_F6CIV3\_222\_456  
UniRef90\_F6DKA0\_218\_449  
UniRef90\_E3Z246\_18\_252  
UniRef90\_B5YHI6\_153\_383  
UniRef90\_A9GF59\_268\_496  
UniRef90\_E8WRA5\_348\_584  
UniRef90\_Q097K6\_265\_506  
UniRef90\_E1KHP7\_365\_592  
UniRef90\_A9AVU3\_644\_869  
UniRef90\_A6UWZ1\_410\_640  
UniRef90\_D4Y401\_348\_580  
UniRef90\_D7ATL0\_341\_566  
UniRef90\_Q1PXZ9\_292\_526  
UniRef90\_E7M6U2\_368\_603  
UniRef90\_D7BCF8\_586\_818  
UniRef90\_D0MGH9\_109\_352  
UniRef90\_UPI000212A698\_523\_767  
UniRef90\_E1K386\_410\_648  
UniRef90\_B9M7U2\_251\_475  
UniRef90\_Q3AAG9\_206\_440  
UniRef90\_UPI0001E8932B\_350\_584  
UniRef90\_C4G960\_243\_473  
UniRef90\_C6J6K9\_342\_579  
UniRef90\_A0YQV3\_1128\_1360

L L N E L L D F S R L E - R K S L Q I N R R E K V D L C D L V E S A V N A I K E F A S S H N V N V L F  
L L N E L L D F S R L E - R K S L Q I N R R E K I D L C G L I E S A V N A I K E F A S S H N V N V L F  
L L N E L L D F S R L E - R K A L Q I K K E K T N I C E L L E S A V G A I K E F A A S Q G V K V F L  
L V N Q I L D F A K I E - Q K T L K L E K T W F D L V E L C Q E V I Q S M G E F A K S K Q V S L E Y  
L L N D L L D F T L I E - S G T M E L E Y S E F D L C E L I K E V V E N L K Q L A E K Y K V K I N V  
L L N D L L D F T L I D - S G S M E L E Y S K F N I C N V V D D V L K K L L S F A Q K Q D V K L E K  
L L D E L L D F A K L E - Q K A M V L E K S K F D L T E L I M Q V I Q S M S E F A R S K K V K L Q C  
L L S D L L D F S Q L E - S H T M K I L K E S V N I C E I I E H S I E T L E N M A K E K D V T V E Y  
L V R D L L D D L S R L E - S H L T T L H R R P V D L A E M A R D V V Q D Y G Y A A E Q A G T D L Y L  
L I D E L L D D L S R V E - S G K F R M Q R R P T V P A E L I A A T A A R F A Q K A E R A G V Q L V T  
L I N D I L T L S K L E - A R D A A L T L H P L D L C G T I R K A Q M L M E D H A R S K G I R I A A  
L I S D I L D D L S R I E - Q H R I L L K M E Q L N V V D V V A E T V Q T M R K R I E K K Q L E L V L  
L I N D L L D L E R L E - S G E A R F E F Q P V D L C S V I K Y V L S I V E P L A V Q Y G V K V E Y  
L I R D L L T L S Q L E - S G G L Q L E L T Q I H L D R A V S H A A G L L E Q K A A R K E I A I D I  
L I N D I L S L S S I E - A K N K E I S R S P V N F N E I V E K V L P I L V P M A E E K N I T V E T  
I L D D L L Q L S Q I E - S G Q V L F R R E P V D L R A L L E R T V A V I K P L A D K K H H T I E L  
L I L D I L A L S R I E - Q H A L F I N Q E V V D I Y Q T I T E A A Q T V T E S A K Q K N I D L V L  
L V Q D L L D D L S K I E - Q G G F R L H L E T V D L A D L R E I A V M F Q Q K S E E K G I D F Y L  
L V N D I L E L S K L E - Q K Q V F M N M Q E V N L T E A V L S T F Q V L V K P T A D E K E M K L N L  
L I N D I L D I E R I E - S G R V K M E R E S C N L T D L I E S A V L M R P L A N K A G V K L S V  
Q I Q D L L D V S R I A - A G G L R L E Y S D V S L Q L L V K E V V R R F A A Q V G D R - I E F E I  
L V D E L L D F S K I E - L N K I K L S F E E V E L D K L I E D T V A I L R P H A S Q D D N V L I C  
L I D D L L T L S K L D - A E R K E L D I R S V G L R A A V Q D T A L D L T L A N D P R A I A L E N  
L V E E L L D D L S K I E - Q H G F Q L Q L E D V D I A Q V I A E A A A V F R Q K A A E K Q I D L H I  
L V S D L L Y L S R L D - S G E N I L N L E E V N L S E L V R F V C E K L K I A K A E K N I Q L T S C  
L I Q D L L D D L S K L E - Q H G F K L D V S T F D L S R L E E V L V L M L K G K A E E K E I Q L Q F  
L I N D L L D L E K M E - E S E V N F E M K D V D L C E V I E Y V Y K I I Q P I A E E N E V D L V V  
L I N D L L D L E K M E - E S S V F E M K E L D L C E V D V Y V Y R I V O P I A E E N E V E L E I  
L I N D I L D L A K I E - Q D Q L G H R S E T V Q L N R V I A E V V H S L O P I P A S E N R V E V H Y  
L I N D I L D L S K I E - E G K T E L E L S E F R V S D V V N V S L I M F K E K A S K H G I K L D A  
L L E D L L T L S R L E - S P N T G L R R E P G D L D R L V K T L L D E Y R T R P A A A R H T L Q L  
L V N E L L D L A R I E - A G H I R L N L E P V N M T E F V E R I S R K D G V A D D N N V E L M G  
L I T D L L D L S K M E - K Q G F Q L N V H E T D M K E L L I E V I T I L E K K P E K K D I E L V L  
L I A D L L D L S K I E - S R N M P L D I Q T I G I G E L L R S T A K T V E E Q M R K R K L S F R V  
L I E S M L D L S K I E - R G E L E M Y R E K V N I C E I V G D V I Q Y L K P L A T E K N I K L N K  
L I M D I L A L S R I E - Q N P V T E N V G T V D V D D V I D Q S V R T I F E L A T E K N I Q V S A  
L I H D L L S L A R I E - S G Q D L I T F R P L A L A P L V E R R V E S F R D R A Q S R N V S L S F  
L V E D L L K L S R L E - N R Q T F L R R Q E V N L N E L I H N I A L V W R R R A E E K G L A F E V  
L V N E L L D L A R M E - A G H F S F R M E P V S F N S F I E R V T H K F N G I A K E K G I D L V C  
F V E R V L D W A R I E - G R K A V Y Q R E I V P V S E L V N A A V E A F R T Q R M E D G V D L T V  
L I N D L L D L E R L E - S G E A R F D F Q K I D L C S V V K Y V V S I T E P L S I D Y D V K V E Y  
L I E D L L S L S R L E - S Q P K R Q D A G R A D L A A T L D R V L T T V N Q L A R E K G V A L E K  
L V N D L L D L S R I E - S G R M K L K F E S V S L D S L I A D S I E S V K H A A S E K G I K L N V  
L I Q D L L D L S K I E - K Q G F S L S I Q Q L D L D T D V L E D V M A I M K G K A A E K E I V F K Y  
L V D D L L D L S K I E - E R R V V H R W Q P V N L V D I N R D T V S L F R P N A A K E K A L T L S L  
L V D D L L Q L S K L E - Y R K G N L N K Q P V N L T E V I R N T V E V F K R A A E K N L S F T S  
L I M D I L A L S R I E - Q N P V A E N I E P V D V D E V I E Q S S R T I F E M A T E K N I Q V S V  
L V E D L L T L S R I E - F G D I K I E K E N I V L D E L I S S V F Q I L L K D K A Q K K G V L L Q K  
L V D D L L D L S K I E - A K N F R L A L S E L D I A P A I E H V T Q L L A E A A R R R V T L T V  
L V R D L L A L S E L E - S G E L A M Q P Q K V L I E D A V R Q A L L L L S P R A E E K G I V M E L  
L I E R V L D W A R L E - S G R K E Y Q R E P T A V A D V D T A V A A F R A Q R L D G G V E L K V  
L V K D L L Q L S R L E - N E Q M Q W N M Q P F C F E S L V R S S V E K I E L S A K E K R Q V I E C  
I L N D L L D V S R I E - S G K V R L Q R K P I N L D E L I Q S T V M S I H Q Q W S G K Q I S L A L  
L I D N M L D L S K I E - R G E L K M D I S K V N L N D I V Q N V V H S L K P L A D G K N I K I I N  
L V Q D L L D L S K I E - Q Q E F Q L H M E T V D L T H L H E I A I M F Q R K A E E K G I D F R M  
L V K D L L L L S K M D - S E D N N L K F E Q K N L N D I V E A I N R L S I E A Q K K N Q K L I V  
M I N D I L D L S K I E - A G K M E L Q Y E S F L V S D A I E D V Y T I L K G L A K K K Q L Q L K T  
L I G D I L E L S K I E - S K R I P L Q F S P V D V E S I V E N S I Q M M K A E A E K K H I T L E S  
M V D N L L D S S R L E - A G R F E V Y K R P V Q L E E T L R G V A D S F T G V A Q L S Q V E F H R  
L V R D L T E I S R L E - T G E L Q L Q P V P F E L F A L V R E V L E S M E P L A A T R Q V S L R C  
L I N I L D L S K I E - A G R M Y L D R E I F C L S Y L I E E V L A T M Y P L A A K K K I D I E T  
L I D N M L D L S K I E - H G E L E M H M E I N L K E L V E N V D T L K P L A D E K N I V I Y  
L I G N F L D L Q Q I N - A R M T Y R M H P L D V C L I I K D A A G L F A L D Y D S G R L V Q C  
L I D L L S L S K I E - A K K V D F A P K P L M L Q E L I Q K M K L L F K S R L E E K E L S F I I  
L I E D L L D L S K I E - K Q G F R L N P Q Y L E I N E L I E E I F V I L E G K A R E K E I D L V L  
U N I R E F 9 0 \_ C 4 G 9 6 0 \_ 2 4 3 \_ 4 7 3  
L I N D L L S L V R M N - K T G I S M N I A S V N M N E L I E S I L H V R P I A D R Q K G S I M S H  
L I G D L L E L S K I E - S K R V P L E Y A P V Q L S E L F D S L S L E V L P A E A Q K S I S M S L  
L I N E I L D L S K I E - S G K M E L Q L S A V N L T Q L C Q S S L N F V K P Q A D Q K N I Q L Q F





N Box

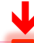

Input pdb SEQRES 2C2A
UniRef90\_A5IIT0\_236\_493
UniRef90\_B9KAB5\_220\_473
UniRef90\_UPI000210F96E\_244\_482
UniRef90\_B7IDY9\_224\_462
UniRef90\_A6LN40\_223\_461
UniRef90\_A8F629\_244\_486
UniRef90\_A7HK36\_224\_466
UniRef90\_D5WTD2\_380\_614
UniRef90\_Q67RF9\_205\_438
UniRef90\_B3E3A4\_350\_579
UniRef90\_C1P968\_353\_593
UniRef90\_UPI000210FB4E\_174\_410
UniRef90\_D7AHN4\_358\_582
UniRef90\_B5X969\_353\_585
UniRef90\_D8PBL4\_363\_603
UniRef90\_D7UVZ9\_356\_591
UniRef90\_C5D651\_348\_580
UniRef90\_F4BLP5\_336\_567
UniRef90\_Q3MG2\_1112\_1344
UniRef90\_B8G455\_316\_540
UniRef90\_E0FRK4\_227\_461
UniRef90\_B1ZT44\_154\_390
UniRef90\_C9RTX6\_347\_579
UniRef90\_A4XJM6\_338\_561
UniRef90\_UPI00018511C5\_286\_519
UniRef90\_A5ILS8\_180\_410
UniRef90\_B9K7H6\_180\_412
UniRef90\_F2I7J7\_353\_596
UniRef90\_B5YHW7\_385\_611
UniRef90\_C0A490\_167\_399
UniRef90\_D6XVE0\_357\_597
UniRef90\_A6CR52\_338\_570
UniRef90\_F5SLG1\_353\_585
UniRef90\_A4FWN1\_406\_639
UniRef90\_D3URW5\_355\_589
UniRef90\_E8R548\_187\_428
UniRef90\_C9RD18\_197\_417
UniRef90\_C1PEW1\_349\_587
UniRef90\_Q1DCL6\_267\_509
UniRef90\_A8F5W9\_184\_414
UniRef90\_Q2RFL3\_239\_485
UniRef90\_D1JAG2\_243\_467
UniRef90\_E5WJB7\_351\_584
UniRef90\_F6CIV3\_222\_456
UniRef90\_F6DKA0\_218\_449
UniRef90\_E3Z246\_18\_252
UniRef90\_B5YHI6\_153\_383
UniRef90\_A9GF59\_268\_496
UniRef90\_E8WRA5\_348\_584
UniRef90\_Q097K6\_265\_506
UniRef90\_E1KHP7\_365\_592
UniRef90\_A9AVU3\_644\_869
UniRef90\_A6UWZ1\_410\_640
UniRef90\_D4Y401\_348\_580
UniRef90\_D7ATL0\_341\_566
UniRef90\_Q1PXZ9\_292\_526
UniRef90\_E7M6U2\_368\_603
UniRef90\_D7BCF8\_586\_818
UniRef90\_D0MGH9\_109\_352
UniRef90\_UPI000212A698\_523\_767
UniRef90\_E1K386\_410\_648
UniRef90\_B9M7U2\_251\_475
UniRef90\_Q3AAG9\_206\_440
UniRef90\_UPI0001E8932B\_350\_584
UniRef90\_C4G960\_243\_473
UniRef90\_C6J6K9\_342\_579
UniRef90\_A0YQV3\_1128\_1360

E S N V P - - - - C P V E A Y I D F T R I R Q V L L N L L N N G V K Y S K - - K D - A - - P D K Y -
UniRef90\_A5IIT0\_236\_493 E S N V P - - - - C P V E A Y V D F T R I R Q V L L N L L N N G V K Y S K - - K D - V - - P D K Y -
UniRef90\_B9KAB5\_220\_473 E K K V - - - - P C F E A E V D F T R M K Q V L L N L L S N G V K Y S K - - K D - E - - P E K Y -
UniRef90\_UPI000210F96E\_244\_482 E G P D - - - - Q L I V F A D R M R L R Q V L M N L V S N G I K I Y S N - - P E - N - - R Y K Y -
UniRef90\_B7IDY9\_224\_462 S C - - - - E S I S I S A D K R R I K Q A I H N L V D N S I K F S D - - K S - K - - E R Y -
UniRef90\_A6LN40\_223\_461 E C - - - - E D V E I S A D K R R I F Q V I Y N L V D N A I K F N D - - R E - K - - P E R F -
UniRef90\_A8F629\_244\_486 V K S K - - - - P I Y I V A D Q K R I R Q V L I N L I S N G I K I Y S K - - E E - A - - S E K Y -
UniRef90\_A7HK36\_224\_466 N C - - - - S N L E I K C D R K R I E Q V I V N L S N A I K F S D - - Q A - K - - E K R F -
UniRef90\_D5WTD2\_380\_614 D K E G - - - - D C R A E V D F D R V R Q V L S N L I D N A L K Y T P - - A G - G - - R - - -
UniRef90\_Q67RF9\_205\_438 E A P D - - - - G L P L I N G D F D R L V Q V L S N L V E N A I K I Y T P - - A G - G - - R - - -
UniRef90\_B3E3A4\_350\_579 E C P D - - - - G M P K V L A D Q G G L E Q V V L N L L D N A I K I Y T P - - D G - G - - D - - -
UniRef90\_C1P968\_353\_593 P Q K R - - - - H V M M E A D K D R L R Q I L L N L V T N A I A Y T P - - D K - G - - R - - -
UniRef90\_UPI000210FB4E\_174\_410 S C Q - - - - D I V L E A D Q D R L I Q M L V N L V D N A V K Y T S L K E T - G E K Q - - - -
UniRef90\_D7AHN4\_358\_582 S A L A - - - - G A P V L A D P G R L E Q V L I N L M D N A L K I Y T P - - P G - G - - T - - -
UniRef90\_B5X969\_353\_585 D I H P - - - - D L P V I M A N D L I K V L I N L V D N A I K I Y T P - - E N - G - - T - - -
UniRef90\_D8PBL4\_363\_603 S L P D - - - - E Y W V V E G D E E R L V Q V F I N L E N A V K I Y T P - - D Q - G - - R - - -
UniRef90\_D7UVZ9\_356\_591 P H A A - - - - K P L P I E T D N D K L K Q I I I N L V S N A V A Y T P - - E N - G - - T - - -
UniRef90\_C5D651\_348\_580 H A P K - - - - S V M E G D A N R I K Q I F I N L I T N A L T Y T P - - K G - G - - K - - -
UniRef90\_F4BLP5\_336\_567 I E E D - - - - T L F I T V D S S R L K Q I L A N L I N N A V V Y T Q - - D S - G - - E - - -
UniRef90\_Q3MG2\_1112\_1344 S H - - - - P S I Q L W V D F D R I V Q T L T N L S N A I K I F S T - - A E - K - - T - - -
UniRef90\_B8G455\_316\_540 R V P D - - - - D M P P V A D Y E R L R Q V F T N L I E N A V K I Y S P - - N G - G - - T - - -
UniRef90\_E0FRK4\_227\_461 K K K I - - - - D R V I N G D V N R L K Q V L V N I I D N G I K A C S - - E R - G - - Y - - -
UniRef90\_B1ZT44\_154\_390 Q V P V - - - - G L S A K V D A A K L R Q V L G N L I E N A I K I Y G R - - R G - G - - R - - -
UniRef90\_C9RTX6\_347\_579 E S P S - - - - G L V I R G D R N R M K Q I L L N L L A N A I T Y T P - - E H - G - - R - - -
UniRef90\_A4XJM6\_338\_561 S I L Q - - - - D I V A M G D M R K I E Q V L I N L I S N A V T Y V Q - - E G - G - - Q - - -
UniRef90\_UPI00018511C5\_286\_519 E P I P - - - - E L T L E G D D R N F K Q V F I N L I N N A I S Y T G - - P G - G - - H - - -
UniRef90\_A5ILS8\_180\_410 E C E - - - - D V V V R G N K E R L I Q M L L N L V D N A V K I Y T S L K E K - G E K K - - - -
UniRef90\_B9K7H6\_180\_412 D C E - - - - N V T V K G N K E R L I Q M L L N L V D N A V K I Y T S L K E K - G E K K - - - -
UniRef90\_F2I7J7\_353\_596 D N D L E - - - - A G I R F T E M E R L K Q I L T N L I N N A I K I Y N K A - E G - G - - Q - - -
UniRef90\_B5YHW7\_385\_611 E I S K E - - - - A D I T V T A D E R K I K Q V L F N L V S N A V K F T P - - D G - G - - S - - -
UniRef90\_C0A490\_167\_399 T L G A - - - - A P G L N F D A L K L E T Q V F H N L L D N A L K I Y T P - - P G - S - - R - - -
UniRef90\_D6XVE0\_357\_597 E I D Q - - - - S D T E A Y V D F D R I E Q V M T N L I D N A I K I Y S P - - V N - G - - S - - -
UniRef90\_A6CR52\_338\_570 H A D E - - - - A V L A E V D S F R I K Q V F I N L I G N A I T Y T P - - A G - G - - E - - -
UniRef90\_F5SLG1\_353\_585 K S E - - - - E F P V Q V D D R F S Q I L L N L S N A M T Y T P - - A G - G - - E - - -
UniRef90\_A4FWN1\_406\_639 N V E - - - - E K I T L E A D K D R I T Q V L T N L I E N A I K F S P - - A N - E - - S - - -
UniRef90\_D3URW5\_355\_589 P E K T V - - - - P P V I E T N R D Q L Q Q I L I N L S N A I N Y T P - - V D - G - - K - - -
UniRef90\_E8R548\_187\_428 V T E L P - - - - P Q F T I L A D E A L R Q I L D N L I D N A I K I Y S S - - D V - D P - - W - - -
UniRef90\_C9RD18\_197\_417 D L P P - - - - G L P L V L G D E E L L T Q V F V N L I D N A L K I Y T P - - V - - G - - R - - -
UniRef90\_C1PEW1\_349\_587 E T S D - - - - S D L T L E I D A D R I E Q V L T N L I D N A L R H T S - - S N - G - - Y - - -
UniRef90\_Q1DCL6\_267\_509 E V S D - - - - G L P A L D V D R A A V A G A L L N L L Q N A Y K I Y S G P - D N - R - - R - - -
UniRef90\_A8F5W9\_184\_414 D C E - - - - E V T I D G D D R L I Q M L L N L A D N A V K I Y T S L K E S - G E K K - - - -
UniRef90\_Q2RFL3\_239\_485 E I P A - - - - E I P E L A I S E S Y L N Q V L L N L I D N G I K I Y T P - - A G - G - - R - - -
UniRef90\_D1JAG2\_243\_467 K L P E - - - - G L S V K G D R E K L T Q V V I N L I N N A I K I F T P - - R S - G - - E - - -
UniRef90\_E5WJB7\_351\_584 Q R D E - - - - K P V Y I E G D I H R L K Q V F I N I S N A I S Y T P - - N Q - G - - V - - -
UniRef90\_F6CIV3\_222\_456 E V P R - - - - D L P S V Y G D E D M L A Q V L I N L L D N A I K I Y T P - - P R - G - - S - - -
UniRef90\_F6DKA0\_218\_449 D I P E - - - - L P E V P G D Q G L L V Q V M V N L V D N A I K I Y T P - - E G - N - - S - - -
UniRef90\_E3Z246\_18\_252 P E K T I - - - - P P I I E T D R D K L Q Q I L I N L S N A I N Y T P - - V D - G - - K - - -
UniRef90\_B5YHI6\_153\_383 E I P P - - - - E T A I Y A D Q Y R M S Q I M I N L V D N A I K F T - - E K - G - - F - - -
UniRef90\_A9GF59\_268\_496 D A S A - - - - L P P V R C D R R A L E Q V L M N L D N A I K I Y A G - - E G - A - - H - - -
UniRef90\_E8WRA5\_348\_584 G S C A - - - - P V S A M A D R G R L D Q V L I N L L E N A I K I Y S G - - Q G - G - - R - - -
UniRef90\_Q097K6\_265\_506 D V P S - - - - G L P Q V E V D R H A V A G A L L N L L Q N A Y K I Y S G - - Q D - K - - R - - -
UniRef90\_E1KHP7\_365\_592 F S I G - - - - D K P E Y A D K D R I E Q V V L N V L T N A I K I Y T P - - D K - G - - K - - -
UniRef90\_A9AVU3\_644\_869 D V P D - - - - D L P P M I A D F E R M R Q I V T N L I S N A Y K I Y T R - - D G - G - - R - - -
UniRef90\_A6UWZ1\_410\_640 K V - - - - E P I T A N L D K D K I T G V L T N L I E N A I K I F S P - - V N - E - - Q - - -
UniRef90\_D4Y401\_348\_580 H A A K - - - - S I Y M E G D A N R L K Q I F I N L I T N A L T Y T P - - K G - G - - N - - -
UniRef90\_D7ATL0\_341\_566 D L Q E - - - - T P R Y V Y I D R D K M E Q V I V N L V T N A I K I Y T P - - E N - G - - M - - -
UniRef90\_Q1PXZ9\_292\_526 V I Q E - - - - D V K I E A D R V K F K Q I L Y N L S N S I K F T P - - Q N - G - - T - - -
UniRef90\_E7M6U2\_368\_603 C V E N - - - - E L Y I E A D E D R L R Q I L I N L S N G I S Y T P - - E G - G - - R - - -
UniRef90\_D7BCF8\_586\_818 E I P P - - - - L P P V E A D F D R I G Q V M G N L S N A F K F T P - - K G - G - - R - - -
UniRef90\_D0MGH9\_109\_352 C V P E - - - - N L P H V L G D R E R L R Q V L I N L V D N A I K I Y N N - - P G - G - - F - - -
UniRef90\_UPI000212A698\_523\_767 V D E V - - - - K N D R V F A D R T K L K Q I M F N L D N A I K F T P - - E A - G - - K - - -
UniRef90\_E1K386\_410\_648 K I - - - - N D I I M K G D K D R I T Q V L T N L I E N A I K I F S P - - V N - G - - K - - -
UniRef90\_B9M7U2\_251\_475 P R - - - - N I P L Q G D E A R L H Q V L T N L I S N G L K I Y S Q - - A P - A - - R - - -
UniRef90\_Q3AAG9\_206\_440 S L P E - - - - N L P L V L A D G D M I S Q V L I N L I D N A I K I Y T P - - A G - G - - K - - -
UniRef90\_UPI0001E8932B\_350\_584 S K P K - - - - K E L Y L F A D A S R I K Q V F I N L I N N A I A Y T P - - A G - G - - E - - -
UniRef90\_C4G960\_243\_473 E S F R - - - - P V F I E I D E T K F S L A I T N L V E N A V K I Y N N - - P G - G - - W - - -
UniRef90\_C6J6K9\_342\_579 D V P E - - - - H L F I E A D E D R L R Q I F M N L S N A I S Y S L - - E G - G - - K - - -
UniRef90\_A0YQV3\_1128\_1360 I A T P - - - - V P V I I N I D E L R I R Q V L I N L L S N A V K F T P - - E G - N - - H - - -

UniRef90\_E3PT03\_185\_421  
UniRef90\_B7GGU1\_348\_587  
UniRef90\_Q39S62\_358\_588  
UniRef90\_B8DOH3\_363\_592  
UniRef90\_F5L948\_225\_461  
UniRef90\_E0NJE3\_365\_590  
UniRef90\_A7II27\_682\_911  
UniRef90\_B9DNB3\_332\_557  
UniRef90\_A7HN49\_181\_412  
UniRef90\_E6QIY0\_358\_593  
UniRef90\_F4L5H3\_895\_1123  
UniRef90\_A9AU3\_448\_692  
UniRef90\_Q1IKU6\_785\_1018  
UniRef90\_B5YD58\_456\_687  
UniRef90\_UPI00016BFB3D\_364\_592  
UniRef90\_E8SIU9\_335\_566  
UniRef90\_B9E797\_336\_561  
UniRef90\_Q8EPE4\_222\_453  
UniRef90\_D5DL55\_355\_590  
UniRef90\_E0HX50\_173\_410  
UniRef90\_B8DZU7\_455\_686  
UniRef90\_D6GSX7\_369\_596  
UniRef90\_D7CLL1\_123\_351  
UniRef90\_Q6LXP6\_406\_633  
UniRef90\_Q67LR3\_257\_496  
UniRef90\_A6LP23\_177\_414  
UniRef90\_B1HWE4\_263\_498  
UniRef90\_Q2B2H9\_351\_585  
UniRef90\_B8FA30\_356\_583  
UniRef90\_B5YJPO\_360\_619  
UniRef90\_F0JJT0\_240\_468  
UniRef90\_E1KHE7\_585\_832  
UniRef90\_C9LCS1\_237\_475  
UniRef90\_B7IEX9\_176\_421  
UniRef90\_Q8TMU8\_474\_720  
UniRef90\_Q7IY67\_354\_593  
UniRef90\_D5DMV7\_352\_585  
UniRef90\_A5D189\_222\_456  
UniRef90\_C027X8\_357\_585  
UniRef90\_D4TMU3\_804\_1043  
UniRef90\_Q0W6Q5\_299\_531  
UniRef90\_B9EGM6\_350\_585  
UniRef90\_UPI000212C3B1\_361\_596  
UniRef90\_A6UFU7\_401\_631  
UniRef90\_A5UQE0\_447\_687  
UniRef90\_A1HSJ7\_400\_654  
UniRef90\_F2JII5\_342\_577  
UniRef90\_Q8R6U6\_339\_575  
UniRef90\_Q8PT37\_279\_503  
UniRef90\_D8G5S6\_939\_1165  
UniRef90\_A8FUB5\_372\_608  
UniRef90\_A5ITL6\_318\_551  
UniRef90\_F6B3A9\_217\_450  
UniRef90\_D9QVY1\_356\_592  
UniRef90\_A9AA11\_406\_633  
UniRef90\_D5E8Z5\_365\_588  
UniRef90\_D2QCT5\_672\_903  
UniRef90\_A3DHV5\_362\_596  
UniRef90\_B0ADS6\_194\_431  
UniRef90\_E7RC70\_372\_606  
UniRef90\_A0B593\_141\_369  
UniRef90\_D4IVS0\_239\_469  
UniRef90\_B1YMQ3\_615\_835  
UniRef90\_C1F3B6\_554\_791  
UniRef90\_E7RJVO\_231\_462  
UniRef90\_D3UFQ2\_354\_596  
UniRef90\_E0RD24\_357\_594  
UniRef90\_F4LRR4\_346\_580  
UniRef90\_Q7NDS1\_97\_331  
UniRef90\_Q647M8\_182\_410  
UniRef90\_B8GGG1\_479\_712  
UniRef90\_B7GKK3\_359\_585  
UniRef90\_C1DVW6\_110\_330  
UniRef90\_C4L472\_342\_574  
UniRef90\_D7GPR0\_250\_485  
UniRef90\_B4SBR4\_490\_736  
UniRef90\_A5GAH6\_406\_635  
UniRef90\_C6WZH9\_504\_741  
UniRef90\_B0TGE0\_245\_473  
UniRef90\_D5E978\_387\_612  
UniRef90\_F5LRU7\_361\_595  
UniRef90\_Q4A159\_364\_598

S P I D - - - - N Q I Y L K S N P D L M K Q L I L N L I D N N A I K Y S K - - E E - G - - F - - - -  
T S N A - - - - P V C Y M Y G D L H R L K Q Q I F I N L I D N N A I K Y T P - - A G - G - - R - - - -  
S G L S - - - - G A Q S V L A D P G R L E Q V L V N L L D N N A I K Y T P - - E G - G - - A - - - -  
D I K E - - - - K L P F V Y L I F E Q I E Q V L I N L V D N G I K Y T E - - P G - G - - R - - - -  
M P P D - - - - E P A V V E A D F D R V Q Q I V I N L S N A I T Y T P - - E G - G - - E - - - -  
D V P M - - - - D I N S M Y V D R H G A D Q V F R N I F S N A L K Y T R - - K G - G - - E - - - -  
E A P E - - - - T V P L R A D E D R L Q Q V V L N L I S N A V K F V P A - E G - G - - R - - - -  
E I Q N - - - - H V M I D A E A S K I A Q V V T N L V S N A I N Y S S - - D E - S - - T - - - -  
K C E C - - - - K S T V Y G D F D R L V Q L V L N L V D N A V K Y T S I K E T - G E K K - - - - -  
D A - - - - A M H M V H A D Q E R I L Q V L A E L V S N A I K F S Q - - P H - T - - V - - - -  
S V S V - - - - D F P A A S A D E N R L Q Q I L Y N L L G N A V K F T - - E S - G - - Y - - - -  
D I P E - - - - G I P P I F A D K D K V R Q I L T N L L S N A I K Y S P - - N G - G - - Q - - - -  
H S - - - - T R G I L Y A D D R D M L Q T L T N L L S N A I K F S K - - P D - N - - T - - - -  
P E - - - - Y P T F I L G D N A R L A Q V F H N L L D N A I K Y S P - - N G - G - - N - - - -  
S Y N K - - - - N K E Y L I E G D F A R I G Q V F H N I L S N A I K Y T E - - D N - G - - Q - - - -  
Q I E P - - - - N V T A M A D E N K I S Q V I V N M L T S N A V N Y S P - - E N - R - - T - - - -  
E L E K - - - - N L F V L A E F S K L K Q V M I N L S N A I N Y S S P - - E D - A - - E - - - -  
E V P D - - - - Q L T M R A D K D R M K Q V L I N L I D N S I H Y T P - - S G - G - - D - - - -  
N G K V E - - - - D E F E A M I D S D R M E Q V L T N L I D N A I R H T D - - D Y - G - - E - - - -  
D V D E - - - - G I F V E G D F D R L V Q L L L N L V D N A V K Y T F A K E H - G P K E - - - - -  
P E - - - - Y P T F V L G D S A R L T Q V F H N L L D N A I K Y S P - - N G - G - - N - - - -  
N L G R - - - - Q S R Q I W V D K T K M E Q V I I N L S N A I K Y T E - - E N - G - - K - - - -  
I F N R - - - - D L P P V K A D E D D L V G Q V L I N L I D N A I K Y T S - - P G - G - - K - - - -  
E V - - - - E D I A I E A D K D R I T Q V L T N L I E N A I K F S P - - A N - E - - S - - - -  
D V P E - - - - G L A R V M A D A D R L H Q V L D N L I S N A I K F S P - - Q G - S - - E - - - -  
V S P D - - - - K I E L I G D K D R L T Q M V L N L V D N A V K Y T S L K E K - G E K K - - - - -  
D I D G - - - - D V Q V M K G D A N R I Q I V T N L I T N A I T Y T P - - E N - T - - T - - - -  
S D Q S - - - - G N G W I K G D F H R L K Q V F I N L L T N A I T Y T P - - Q G - G - - K - - - -  
D C P D - - - - D L T A V F D P T M I E Q A V V N L L D N A V K Y S E - - E H - G - - V - - - -  
E I Q P - - - - S L P F I N A D R E R L I Q V V I N L S N A L K F T - - E K - G - - Y - - - -  
E V E P - - - - G L A V R A D F A H V R Q V L T N L A G N G V K F S E - - R G - G - - T - - - -  
V D N A - - - - D D T F G F I D K D L F E A V I A N L I S N A L K F T D - - S E - G - - Y - - - -  
E S Y R - - - - P I V A E I D E V K L S L A L S N L V E N G I K Y N V - - E D - G - - W - - - -  
V Y P D - - - - E L Y L V G D K D R L T Q M T L N L V D N A I K Y T S L K E K - G K K K - - - - -  
E I D S - - - - N L S R V Y A D K E R I L Q V L S N L V T N A V K F S N - - E N - G - - C - - - -  
E L E T - - - - P D L E Y S D F D R M E Q V L I N L I M N A I R H T G - - K E - G - - Y D G K V - - - -  
D T L P - - - - E E A W I D G D S Q R L M Q V F V N L I G N A L M Y T M - - P G - G - - T - - - -  
N L P E - - - - D L P V V Q G D F D M L S Q V L L N L I E N A V V Y T Q - - A G - G - - E - - - -  
P S P K - - - - P D I W L M T D K D C L Q Q I I L N L L T N A I A Y T Q - - E G - G - - K - - - -  
Q N S N S S S N S S S I Q L W A D F D R I I Q T L T N L F S N A I K F S E - - P G - S - - T - - - -  
D V P L - - - - T L P M I S A D R S R I Q Q V L L N V L N N A I K Y T P - - D G - G - - Q - - - -  
H Y S H - - - - H S K A W L D Y D K M I Q V I T N I D N A L R Y T V - - A G - D - - V - - - -  
N V D G - - - - D F Y M E A D E D R L R Q I L I N L L S N G I S Y T P - - E G - G - - R - - - -  
D I - - - - K D L L I N A D K D R I T Q V F T N L I E N A I K F S P - - A N - E - - S - - - -  
D I P P - - - - H L P P V Y A D R D K V R Q V L V N L I T N A V K Y S P - - N G - G - - E - - - -  
A V D A G - - - - V P P Q V Q D V R R F K Q I M Y N L L S N A V K F T P - - D G - G - - A - - - -  
G Y D K - - - - K E E Y F I E G D L S R I R Q I L H N I L S N A I K Y S P - - E P - G - - T - - - -  
N L S E - - - - T L Q K V N V D K D K V E Q M A M N I I N N A I K Y T P - - E G - G - - V - - - -  
N V E P - - - - G F V Y A D R T R F K Q I M Y N L V S N A V K F T Q - - K G - G - - S - - - -  
S S - - - - L S I S L W A D F D R I V Q T L I N L L S N A I K F S S H - - T G - K - - I - - - -  
N L P Q - - - - R E I Y V E I D Q D K I T Q V L D N I S N A M K Y S P - - E G - G - - H - - - -  
D I E K - - - - D V I V K A Q E S K I A Q V I T N L L T N A I N Y S Y - - E D - G - - D - - - -  
V L P D - - - - K L P Q V G D H G L L T Q V M V N L I D N A I K Y T P - - A S - G - - Q - - - -  
D V P V - - - - D I T G I K G S R G L E R L Y I N L V D N G I K Y T S - - E G - G - - Q - - - -  
E I - - - - E E I A I D A D K D R I T Q V L T N L I E N A I K F S P - - A N - E - - S - - - -  
I N N S - - - - A I A K V W V D R V K F Q I L H N L L S N A I K F T P - - E K - G - - E - - - -  
C P T Q - - - - A Q P V D G D R D R L M Q V L I N L S N A I K F S P - - A G T G - - H - - - -  
F T I G - - - - E E L E I V A D K D R M E Q V V L N L I T N A I K Y T P - - E G - G - - K - - - -  
N F E D - - - - E D V C I Y G F R D N I K Q I F L N L I D N G I K Y T P - - K D - G - - H - - - -  
Q L P K - - - - E Q Y F V E I D F D K L T Q V I D N I S N A L K Y S P - - E G - G - - K - - - -  
R C E R - - - - A N T L I E C D F K K I M Q V L S N L L T N A I K Y T P - - D R - G - - Q - - - -  
E S F R - - - - P V V A E V D E V K F T L V V T N L V E N A I K Y N D - - E G - G - - W - - - -  
V - - - - G P I M A D A E K I K Q L L N N L L S N A I K Y S P - - D G - G - - N - - - -  
E A - - - - E P M D L W D A D R I L Q T L G N L I S N A I K F S P - - A G - A - - D - - - -  
U n i R e f 9 0 \_ E 7 R J V 0 \_ 2 3 1 \_ 4 6 2  
E I Q - - - - P V T V L G D A N R L I Q V M M N L L I N A V T Y S S - - N Y - T - - E - - - -  
E L E T - - - - P N L E Y S Y D F D R M E Q V L I N L I M N A I R H T G - - K E - G - - Y D G K V - - - -  
D I P D - - - - N E L F M E A D E D K L Q Q I F L N L L S N G I N Y T L - - D G - G - - K - - - -  
K L P E - - - - N I A H I L S N E D S L L Q I M I N L L D N A I K Y T P - - E G - G - - T - - - -  
- - P G - - - - A L P E V W A D Q D R L E Q I L T N L I D N A L K Y S E - - H G - A - - P - - - -  
K L A E - - - - M P N I G D A E R L R Q A I G N L L N N A I K F S E - - K T - G - - K - - - -  
R T - - - - P L P V F A D R D K V K Q I I V N L S N A I K Y S P - - E G - T - - E - - - -  
E M N D - - - - E L I V S F D F D R V E Q V L T N L I D N A L R H T D - - E G - G - - E - - - -  
Q V P N - - - - K F D V Y A D E Q K M S I A L K N L I E N A I K Y N K - - Q N - G - - K - - - -  
K H E G - - - - T V V L Q A D L N R M K Q V I M N L V A N A I N Y S P - - E G - S - - R - - - -  
E S K R - - - - D V S A D I D E V K F S L A V N N L V E N A V K Y N K - - E D - G - - W - - - -  
H V E P - - - - E T M Q V N A D F D A L K Q V V I N L A V N A I K F T P - - R D - G - - C - - - -  
P S - - - - D L P R I C G D N K Q L R Q V F N N L V S N A V K Y S P - - K G - G - - A - - - -  
K H F A - - - - D I E V F A D K E R L K Q V L T N L L T N A I K Y S P - - K A - N - - S - - - -  
D V E T - - - - N L P L L P L S F D N L K Q V L V N L T E N A I K Y T P - - E G - G - - Q - - - -  
N N K F - - - - D I D I L D K L K F I Q I M S N L L S N A V K F T P - - D K - G - - K - - - -  
N V D E - - - - A L F L E A D E D R L R Q I L I N L M A N G I N Y T P - - E G - G - - R - - - -  
E V P T - - - - E T I F T E I D P D K M T Q V F D N V I T N A M K Y S R - - G D - K - - R - - - -



UniRef90\_E3PT03\_185\_421 - V - - R L T - - L L - - - - - - - - - - - - - - - - - - - - E - D S - - K K V L F S V E D D G I G I P S E D I
UniRef90\_B7GGU1\_348\_587 - V - - T V Y - - V E - - - - - - - - - - - - - - - - - - - - K - D E - - K E L H V H V S D D T G V G I P P K E I
UniRef90\_Q39S62\_358\_588 - I - - S F S - - A A - - - - - - - - - - - - - - - - - - - - - V - K E - - N M V R I G V K D T G V G I P P K D L
UniRef90\_B8DOH3\_363\_592 - V - - I L R - - A Y - - - - - - - - - - - - - - - - - - - - E - E N - - N R V V V E V E D D N G I G I P E D Q
UniRef90\_F5L948\_225\_461 - V - - R L S - - I D - - - - - - - - - - - - - - - - - - - - P W P D - - K G Y R I C V S D T G M G I N K E E I
UniRef90\_E0NJE3\_365\_590 - I - - K V T - - A K - - - - - - - - - - - - - - - - - - - - S - E G - - A S V E I I V E D D N G I G I P E R E D L
UniRef90\_A7II27\_682\_911 - V - - H V S - - L H - - - - - - - - - - - - - - - - - - - - V - E G - - D G L V V R V K D D N G P G V P E A E R
UniRef90\_B9DNB3\_332\_557 - V - - Y V R - - V Y - - - - - - - - - - - - - - - - - - - - Q - K D - - D K R I L E V E D B H G I G I A P E E Q
UniRef90\_A7HN49\_181\_412 - V - - F V K - - C Y - - - - - - - - - - - - - - - - - - - - G - K E - - D K L V F E V Q D T G P G I P E D A Q
UniRef90\_E6QIY0\_358\_593 - V - - K L S - - A E - - - - - - - - - - - - - - - - - - - - S - A G - - P G E V I I V A D Q G R G I A A D K L
UniRef90\_F4L5H3\_895\_1123 - I - - K I D - - A L - - - - - - - - - - - - - - - - - - - - E - R D - - N D L V V C V E D D T G P G I P P D K R
UniRef90\_A9AU3\_448\_692 - V - - A L I - - V R - - E L R K V P P G A P P L - - N E - - R S V I A V R D Q G M G I S E D E L
UniRef90\_Q1IKU6\_785\_1018 - V - - T I S - - S Q - - - - - - - - - - - - - - - - - - - - R - R G - - G G L L I R V R D Q G R G I P S N K L
UniRef90\_B5YD58\_456\_687 - I - - W V R - - V S - - - - - - - - - - - - - - - - - - - - D - K M - - E D I V I E V Q D Q G I G I P P E H L
UniRef90\_UPI00016BFB3D\_364\_592 - I - - K I N - - L S - - - - - - - - - - - - - - - - - - - - S - N D - - Q Q V V I K V K D T G I G M S K K D L
UniRef90\_E8SIU9\_335\_566 - V - - T L A - - V Y - - - - - - - - - - - - - - - - - - - - R - E N - - Q H P V I E V I D Q G I G I G E K E K
UniRef90\_B9E797\_336\_561 - I - - T V K - - A Y - - - - - - - - - - - - - - - - - - - - L - K A - - D E C I V E I I D Q G I G I A P E E T
UniRef90\_Q8EPE4\_222\_453 - I - - C L A - - I S - - - - - - - - - - - - - - - - - - - - E - E T - - D V I H F Q V K D S G I G M D E K S Q
UniRef90\_D5DL55\_355\_590 - I - - K L H - - L D - - - - - - - - - - - - - - - - - - - - K - S Q - - S E I H L S V Q D T G A G I P K E D L
UniRef90\_E0HX50\_173\_410 - V - - W L R - - A Y - - - - - - - - - - - - - - - - - - - - A - Q N - - N S A M I E V E D T G V G I P E D S L
UniRef90\_B8DZU7\_455\_686 - V - - W V R - - V A - - - - - - - - - - - - - - - - - - - - D - K M - - E D I L I E V Q D Q G V G I P P E H L
UniRef90\_D6GSX7\_369\_596 - I - - S L S - - L F - - - - - - - - - - - - - - - - - - - - V - S E - - G I L D I V I E D N G I G I P K E D V
UniRef90\_D7CLL1\_123\_351 - I - - V I R - - V K - - - - - - - - - - - - - - - - - - - - R - R G - - D Q V F T S I T D T G T G I P Q E S L
UniRef90\_Q6LXP6\_406\_633 - I - - L V S - - G V - - - - - - - - - - - - - - - - - - - - L - E D - - E H I H L K V T D R G A G I P K K D M
UniRef90\_Q67LR3\_257\_496 - V - - L I R - - A R - - - - - - - - - - - - - - - - - - - - E - T G - - D G V R F D V I D R G P G I P A D Q T
UniRef90\_A6LP23\_177\_414 - V - - L V E - - A Y - - - - - - - - - - - - - - - - - - - - K - D N - - N H V K L I V K D T G V G I P E K A Q
UniRef90\_B1HWE4\_263\_498 - V - - S I R - - L K - - - - - - - - - - - - - - - - - - - - E - N E - - T Y G I I E I E D Q G I G I E K H E I
UniRef90\_Q2B2H9\_351\_585 - I - - S V S - - L E - - - - - - - - - - - - - - - - - - - - E - K E - - D K V Q V E V K D T G M G I D Q D E I
UniRef90\_B8FA30\_356\_583 - V - - R V G - - A K - - - - - - - - - - - - - - - - - - - - A - E G - - G E V L I W V E D G P G I S E E H L
UniRef90\_B5YJF0\_360\_619 - V - - K C K - - T A - - - - - - - - - - - - - - - - - - - - L - N A - - D E I V V S V E D S G I G I P E E K
UniRef90\_F0JTO\_240\_468 - V - - R L I - - A E - - - - - - - - - - - - - - - - - - - - R - S G - - R E V L F S V A D D G P G I P V D E Q
UniRef90\_E1KHE7\_585\_832 - I - - I E - - L N - - - - - - - - - - - - - - - - - - - - K - L D - - T S F E I V V K D S G I G I P K D K L
UniRef90\_C9LCS1\_237\_475 - V - - H V T - - L N - - - - - - - - - - - - - - - - - - - - A - D H - - K Y F Y V S V E D S G I G I P Q E S I
UniRef90\_B7IEX9\_176\_421 - I - - T V E - - A W - - - - - - - - - - - - - - - - - - - - K - E N - - N S I K L V K D T G V G I P E K A Q
UniRef90\_Q8TMU8\_474\_720 - V - - K V K - - A V - - - - - - - - - - - - - - - - - - - - Q - M D - - G F L K I T V A D D G I G I A A A D H
UniRef90\_Q71Y67\_354\_593 - I - - K Q T - - I D - - - - - - - - - - - - - - - - - - - - E - A R - - S N L V I T V S D N G S G I A E E D I
UniRef90\_D5DMV7\_352\_585 - V - - H V S - - L E - - - - - - - - - - - - - - - - - - - - E - E E - - E T I T V H V Q D T G I G I D S D E I
UniRef90\_A5D189\_222\_456 - V - - S I S - - A A - - - - - - - - - - - - - - - - - - - - A - T Q - - D E M K V D V K D N G I G I P P E S L
UniRef90\_C027X8\_357\_585 - I - - S I K - - T E - - - - - - - - - - - - - - - - - - - - A - D S - - E N I T I Q V M D T G I G I P K E L
UniRef90\_D4TMU3\_804\_1043 - V - - Y L M - - T E - - - - - - - - - - - - - - - - - - - - L - Q K - - D Q V L V T V Q D T G R G I P E D K L
UniRef90\_Q0W6Q5\_299\_531 - I - - S I S - - V R - - - - - - - - - - - - - - - - - - - - D - E C - - D H L L I A V R D T G I G I P K E D I
UniRef90\_B9E6M6\_350\_585 - I - - S I H - - T D - - - - - - - - - - - - - - - - - - - - E - D D - - E N L I I R I S D T G V G I A P E H I
UniRef90\_UPI000212C3B1\_361\_596 - V - - R L K - - V E - - - - - - Q L V S G K E V - - E H - - D K V R F T I A D T G I G I P K K D L
UniRef90\_A6UPU7\_401\_631 - I - - M I I - - G K - - - - - - - - - - - - - - - - - - - - E - T E N - - G D V H I T V K D N G A G I P K K D L
UniRef90\_A5UQE0\_447\_687 - I - - R L T - - I S - - D N V E L P P D H - - P - R G - - K F V R V A V S D Q G I G I A P E D L
UniRef90\_A1HSJ7\_400\_654 - I - - K V E - - C R - - - - - - - - - - - - - - - - - - - - D - A G - - E W L E I S V E D T G I G I A A T H A
UniRef90\_F2JII5\_342\_577 - L - - G V Y - - M K - - - - - - - - - - - - - - - - - - - - K - E N - - A Y V I V E I T D T G M G I P E D L
UniRef90\_Q8R6U6\_339\_575 - I - - E I S - - T A - - - - - - - - - - - - - - - - - - - - Y - D E - - E G V T F T V K D N G I G I P K E D L
UniRef90\_Q8PT37\_279\_503 - V - - E V L - - G I - - - - - - - - - - - - - - - - - - - - V - S E - - K G V R V S V S D T G I G I S K D E I
UniRef90\_D8G5S6\_939\_1165 - V - - W L T - - V Q - - - - - - - - - - - - - - - - - - - - Q - Q D - - R H L L F I V K D E G R G I P T E K L
UniRef90\_A8FJB5\_372\_608 - I - - T F T - - V D - - - - - - - - - - - - - - - - - - - - L - D E E K - - S L V L F S V K D E G I G I P K K D M
UniRef90\_A5ITL6\_318\_551 - I - - N V R - - V Y - - - - - - - - - - - - - - - - - - - - R - D D - - F R V I F E V Q D F G I G I K L E D Q
UniRef90\_F6B3A9\_217\_450 - V - - K V G - - V N - - - - - - - - - - - - - - - - - - - - L - N R - - E K V R V Y A D T G I G I P Q E D L
UniRef90\_D9QVY1\_356\_592 - V - - K I K - - V Y - - - - - - - - - - - - - - - - - - - - E - D E - - D R V W S E I I D T G M G I P E D L
UniRef90\_A9AA11\_406\_633 - I - - M I S - - A D - - - - - - - - - - - - - - - - - - - - L - E D - - E H V H L R V T D H G A G I P K K D M
UniRef90\_D5E8Z5\_365\_588 - V - - K I Y - - L S - - - - - - - - - - - - - - - - - - - - T - D D - - G T A Q I S V A D T G I G I P A E K I
UniRef90\_D2QCT5\_672\_903 - V - - T V C - - L T - - - - - - - - - - - - - - - - - - - - I - R D - - E R V N L T V R D N G I G I E P D V Q
UniRef90\_A3DHV5\_362\_596 - I - - T V Y - - I G - - - - - - - - - - - - - - - - - - - - R - M Y - - S E V Y V K V V D S G I G I P R E D L
UniRef90\_B0ADS6\_194\_431 - I - - E V V Q H Y D - - - - - - - - - - - - - - - - - - - - E - N R - - Q N I I L E F K D N G I G I P K E S L
UniRef90\_E7RC70\_372\_606 - V - - R F N - - M T - - - - - - - - - - - - - - - - - - - - V - E E - - G Y L L I Q I S D E G M G I P K E N V
UniRef90\_A0B593\_141\_369 - I - - E V V - - L G - - - - - - - - - - - - - - - - - - - - G - D A - - E N V L V S I R D N G I G I R E E D K
UniRef90\_D4IVS0\_239\_469 - V - - H I S - - L N - - - - - - - - - - - - - - - - - - - - S - D H - - G F F Y I K V E D N G L G I P E N S V
UniRef90\_B1YMQ3\_615\_835 - V - - A I R - - I E - - - - - - - - - - - - - - - - - - - - N - H D - - G F A E I T I R D Q G I G I P Q E A M
UniRef90\_C1F3B6\_554\_791 - V - - L V R - - A S - - - - - - - - - - - - - - - - - - - - V - R G - - K A E A V I E V R D H G R G I P P E K I
UniRef90\_E7RJVO\_231\_462 - I - - T I R - - L F - - - - - - - - - - - - - - - - - - - - R - K D - - N R A I I Q V E D Q G I G I E S S E I
UniRef90\_D3UPQ2\_354\_596 - V L - - K Q T - - I D - - - - - - - - - - - - - - - - - - - - E - T N - - N K L I I T V S D N G S G I A E E D I
UniRef90\_E0RD24\_357\_594 - V - - K I K - - V L - - - - - - T I - - - Q R E - - D T - - E K V V F T V S D T G I G I P K K D L
UniRef90\_F4LRR4\_346\_580 - I - - S I M - - V E - - - - - - - - - - - - - - - - - - - - E - T L - - E N V L I T V A D N G I G I A E D E L
UniRef90\_Q7NDS1\_97\_331 - V - - C V S - - A D - - - - - - L D P - - - - - - - - - - - - - - E - D R - - N V L W I A V R D L G I G I P E N L
UniRef90\_Q647M8\_182\_410 - V - - I I E - - T K - - - - - - - - - - - - - - - - - - - - R - L G - - K N V Q F S I T D Y G I G I S K A D Q
UniRef90\_B8GG1\_479\_712 - I - - Q L I - - V R Q A E A S D L P A G H - - P - A G - - Q W M L I T V Q D Q G I G I E P E D Q
UniRef90\_B7GKK3\_359\_585 - V - - R V I - - V D - - - - - - - - - - - - - - - - - - - - A - D E - - E V V R I S V Q D S G S G I P E D L
UniRef90\_C1DVW6\_110\_330 - V - - I V K - - A V - - - - - - - - - - - - - - - - - - - - K - D S - - K Y T T I T V E D T G I G I P E S I
UniRef90\_C4L472\_342\_574 - I - - E I A - - V E - - - - - - - - - - - - - - - - - - - - A - K A - - D S Y K L R V K D N G I G I A K E V
UniRef90\_D7GFR0\_250\_485 - V - - R V T - - L D - - - - - - - - - - - - - - - - - - - - A - D H - - K F F Y L K V A D S G I G I P A E F K
UniRef90\_B4S8R4\_490\_736 - V - - R V S - - L S - - - - - - - - - - - - - - - - - - - - N - D A - - H W M V L T V K D S G I G I P E S D Y
UniRef90\_A5GAH6\_406\_635 - V - - R V A - - A R - - - - - - - - - - - - - - - - - - - - R - E K - - D C V V I T V R D E G I G I S P Q A V
UniRef90\_C6WZH9\_504\_741 - V - - N V E - - L W - - - - - - - - - - - - - - - - - - - - V - E D - - G R G I V S V E D F G I G M E A S E L
UniRef90\_B0TGE0\_245\_473 - V - - S V R - - A T - - - - - - - - - - - - - - - - - - - - R - G C - - D S V I L E V Q D T G I G I P E S L
UniRef90\_D5E978\_387\_612 - V - - S V D - - I D - - - - - - - - - - - - - - - - - - - - F - V A - - E Y V Q V S V T D S G I G I P E H K L
UniRef90\_F5LRU7\_361\_595 - V - - S V A - - A E - - - - - - L A G S G T E - - G - E D - - E R I R I S I K D T G I G I P K K D L
UniRef90\_Q4A159\_364\_598 - V - - E F H - - V K - - - - - - - - - - - - - - - - - - - - Q - N A - - L Y N R M T I R V K D N G I G I P I N K V

|                                | F Box                                   | G2 Box                                  | G3                          |
|--------------------------------|-----------------------------------------|-----------------------------------------|-----------------------------|
| <u>Input pdb SEQRES 2C2A</u>   | D R I F E Q F Y R V D S S L T Y E V P   | - G T G L G L A I T K E I V E L H G     | G R I W V E - S E V G K G   |
| UniRef90_A5IIT0_236_493        | D R I F E Q F Y R V D S S L T Y E V P   | - G T G L G L A I T K E I V E L H G     | G K I W V E - S E V G K G   |
| UniRef90_B9KAB5_220_473        | E K I F E Q F Y R V D S S L T Y E V S   | - G T G L G L A I T K E I V E L H G     | G G R I W V E - S E E G K G |
| UniRef90_UPI000210F96E_244_482 | S R I F E K F F R V Q S F K D Y K V E   | - G T G L G L A I T C K E I V E L H G   | G G K I W F E - S E P G K G |
| UniRef90_B7IDy9_224_462        | E K I F E K F Y R G D R S L T Y E V P   | - G T G L G L A I T V Q E I I K L H G   | G G K I N V N - S T L G E G |
| UniRef90_A6LN40_223_461        | E K I F E K F Y K I D R S L T Y E V P   | - G T G M G L A I V K E I V R L H G     | G G N I E V E - S E E K K G |
| UniRef90_A8F6Z9_244_486        | N K I F E K F F R A D S V F D Y R T E   | - G T G L G L A I S K E I V E L H G     | G G Q I W F E - S K P H E G |
| UniRef90_A7HK36_224_466        | D K I F E R F Y R V D N E L T Y A V P   | - G T G L G L A I V K E I V E L H G     | G G N I L V E - S E V G K Y |
| UniRef90_D5WTD2_380_614        | D R V F E R F Y R V D K A R A R T T G   | - G T G L G L A I V K H V V Q L H G     | G G R V G V E - S E V G K G |
| UniRef90_Q67RF9_205_438        | G R I F E R F Y R V D K A R S R A T G   | - G T G L G L A I A K H I V E A H G     | G G T I G V E - S E V G K G |
| UniRef90_B3E3A4_350_579        | P R I F E R F Y R V D E G R S R E Q G   | - G T G L G L A I V K H I V Q L H G     | G G E V Q V A - S E A G K G |
| UniRef90_C1P968_353_593        | P R I F E R F Y R V D K A R S R Q S G   | - G T G L G L A I V K H L V E S Y H G   | G K I R V E - S E E G K G   |
| UniRef90_UPI000210FB4E_174_410 | E R I F D R F Y R V D K A R S R K M G   | - G A G L G L S I V K T I V D R H G     | G K I Y V E - S E V G K G   |
| UniRef90_D7AHN4_358_582        | P R I F E R F Y R V D K A R S R D E G   | - G T G L G L S I V K H I I Q L H G     | G G N I T V E - S E H G V G |
| UniRef90_D5X969_353_585        | S R L F E R F Y R V D K A R S R E L G   | - G T G L G L A I V K H A L E A H G     | G T I K V E - S Q V G M G   |
| UniRef90_D8PBL4_363_603        | P R V F E R F Y R V D K A R S R E L G   | - G T G L G L A I V K H I V E A H S G   | G Q V W E - G N T P R G     |
| UniRef90_D7UVZ9_356_591        | R V F E R F Y R V D K A R S R Y S G     | - G T G L G L S I V K H L T E Q L G R   | G I V E A - S V E G E G     |
| UniRef90_C5D651_348_580        | P R I F E R F Y R V D K A R G R N S G   | - G T G L G L A I V K H L V E A H H G   | H I T V K - S T V G K G     |
| UniRef90_F4BLP5_336_567        | D R I F E R F Y R V D K A R S R N S G   | - G T G L G L S I V K Y L V E N I N G S | I A V E - S K L G L G       |
| UniRef90_Q3MGM2_1112_1344      | D S I F E R F Y Q V D S S D S R N H D   | - G T G L G L A I C Q S I V Q Q H G     | G R I W A E - S V L S E G   |
| UniRef90_B8G4S5_316_540        | D L I F E R F Y R V D N R L R R D R P   | - G S G L G L Y I T R A I V E A H G     | G R I W V E - S Q V G R G   |
| UniRef90_E0FRK4_227_461        | K Y I F D K F Y R - - - G K N N K Y S   | - G T G L G L A I S K K I I E E H K G   | T I T V E - S E V G K G     |
| UniRef90_B1ZT44_154_390        | S R V F E R F Y R V D K A R S R E Q G   | - G T G L G L S I V K N L V Q A H G     | G E V R V E - S E L G R G   |
| UniRef90_C9RTX6_347_579        | P R I F E R F Y R V D K A R S R D S G   | - G T G L G L A I V K H L V E A H H G   | Y I T V A - S K V G R G     |
| UniRef90_A4XMJ6_338_561        | P R I F E R F Y R V D K A R S R E L G   | - G S G L G L S I A D E I V K A H G     | K I L V E - S K V G S G     |
| UniRef90_UPI00018511C5_286_519 | P R I F E R F Y R I D K A R S R N S G   | - G T G L G L A I V K H I V E A H H G   | E I D V E - S E S E V G     |
| UniRef90_A5ILS8_180_410        | S R I F E K F Y R V D K A R S R K M G   | - G T G L G L T I V K T I V D K H G     | G R I E V E - S E I N Q G   |
| UniRef90_B9K7H6_180_412        | S R I F E K F F R V D K A R S R K M G   | - G T G L G L T I V K T I V D R H G     | G K I E V E - S E V G Q G   |
| UniRef90_F217J7_353_596        | P R I F E R F Y R V D K T R S T A S G   | - G T G L G L S I V R N L V A S M S G   | K I D V V - S E L N E G     |
| UniRef90_B5YHW7_385_611        | D K L F Q P P F S Q L E T T Y T K K Y Q | - G T G L G L A L S K S L V E L H G     | G K I W C E - S E Y G K G   |
| UniRef90_C0A490_167_399        | P H I F E R F Y R V D K G R S R E T G   | - G T G L G L S I V K H I V Q L H G     | G R V W V E - S E P G R G   |
| UniRef90_D6XVE0_357_597        | P F V F E R F Y K A D K A R T R G R A   | - G T G L G L A I V K N I V E A H K G   | R V S A H - S R M G E G     |
| UniRef90_A6CR52_338_570        | P R I F E R F Y R V D K A R S R D S G   | - G T G L G L A I V K H L I E A H G     | G T I G V E - S K V N E G   |
| UniRef90_F5SLG1_353_585        | P R I F E R F Y R V D K A R S R E S G   | - G T G L G L A I V K H L V E A H Q G   | E I Q V T - S R A G K G     |
| UniRef90_A4FWN1_406_639        | E K V F D R F Y Q V D S S T K R K K G   | - G S G L G L A V C K S I V E A H G     | G S I W V E - S E L G K G   |
| UniRef90_D3URW5_355_589        | D R V F E R F Y R V D K A R S R H S G   | - G T G L G L S I V K H L V E N C G G   | R I E V E - S Q E E V G     |
| UniRef90_E8R548_187_428        | T R I F E R F Y R V D K A R S R E R G   | - G T G L G L A I V K H L V Q A L R G   | G I E L Q - S R V A G G     |
| UniRef90_C9RD18_197_417        | P R V F E R F F R V D R A R S R A S G   | - G T G L G L S I V K H I V E L H H G   | G K V G V E - S E L G K G   |
| UniRef90_C1PEW1_349_587        | P F V F E R F Y K A D K A R T R G K S   | - G T G L G L A I A K N I V E I E G H G | G R I S V K - S K L G E G   |
| UniRef90_Q1DCL6_267_509        | T R I F E R F Y R V D N L T R R T E     | - G S G L G L A I T R R I I E T H G     | R I S V Q - S E P G K G     |
| UniRef90_A8F5W9_184_414        | N R I F D R F Y R V D K G R S R K M G   | - G S G L G L S I V K T I V D R H N G   | Q I F V E - S E P G A G     |
| UniRef90_Q2RFL3_239_485        | P R V F E R F Y R V D K A R S R E M G   | - G T G L G L A I V K H I V E S H G     | S I S V T - S R P G Q G     |
| UniRef90_D1JAG2_243_467        | E K V F D K F Y Q V D S T L T R E A G   | - G T G L G L A I C K G I E A H H G     | H I W A E - S E L G K G     |
| UniRef90_E5WJB7_351_584        | P R I F E R F Y R V D K A R S R N S G   | - G T G L G L A I V K H L V E A H H G   | S I S V K - S E V G K G     |
| UniRef90_F6CIV3_222_456        | P R I F E R F Y R V D K A R S R E L G   | - G F G I G L A I V K H I R A H H G     | G K I E V E - S T P G K G   |
| UniRef90_F6DKA0_218_449        | S R V F E R F Y R V D K A R S R D V G   | - G T G L G L S I S K H I V E A H H G   | K I W A E - S H - S E G     |
| UniRef90_E3Z246_18_252         | D R V F E R F Y R V D K A R S R H S G   | - G T G L G L S I V K H L V E N C G G   | R I E V E - S Q E E V G     |
| UniRef90_B5YHI6_153_383        | H R I G E R F Y R V D K A R S R Q L G   | - G T G L G L A I V K H L V L A H G     | W Q L Q I E - S E V E K G   |
| UniRef90_A9GF59_268_496        | G R I F E R F Y R V D A G R S R D L G   | - G T G L G L A I V K H L V E L M N G   | S I E V E - S A I G R G     |
| UniRef90_E8WRA5_348_584        | P R L F E R F Y R V D E A R S R E R G   | - G T G L G L S I V K H I V M A H H G   | G S V F V E - S T V G K G   |
| UniRef90_Q097K6_265_506        | Q R I F E R F Y R V D N L L T R K T E   | - G S G L G L A I T K R I I E A H H G   | R I S V Q - S K L G K G     |
| UniRef90_E1KHP7_365_592        | K R V F E R F Y R V D K A R S R E M G   | - G T G L G L S I A K E I I E A H H G   | S I S I S - S Q L G K G     |
| UniRef90_A9AVU3_644_869        | K H I F T R F F R S E N P L K E Q A G   | - G T G L G L N I T K S L V E L H G     | G K I W F D - S E E G R G   |
| UniRef90_A6UWZ1_410_640        | T K I F D I F Y Q V N S A K R I K S     | - G S G L G L A I C K S I V E S H G     | G K I W V E - S K F G K E   |
| UniRef90_D4Y401_348_580        | P R I F E R F Y R V D K A R S R H S G   | - G T G L G L A I V K H L V E A H H G   | H I T V K - S A V G K G     |
| UniRef90_D7ATL0_341_566        | P R I F E R F Y R V D K A R S R E L G   | - G T G L G L S I V K Q I V E L H H G   | E V N I E - S E V G K G     |
| UniRef90_Q1PXZ9_292_526        | E K V F K E F W Q A D S F S R K Y E     | - G T G L G L A L T R R I V E M H H G   | K I W L K - S E Y G K G     |
| UniRef90_E7M6U2_368_603        | P R I F E R F Y R V D K A R S R S S G   | - G T G L G L S I V K H L T E L H H G   | T I S V E - S E A G K G     |
| UniRef90_D7BCF8_586_818        | S R L F Q R Y G R T Q S A V S R G V S   | - G T G L G L Y I S K A I V E A H H G   | R I W V E - S E V G K G     |
| UniRef90_DOMGH9_109_352        | P R L T E R F Y R V D R S R R E Q G     | - G T G L G L A I V K H I L N A H Q     | T R L E I E - S T P G K G   |
| UniRef90_UPI000212A698_523_767 | E N I F D L F T Q V D G S I K R K Y D   | - G T G L G L A I V K Q Y V E M H N G   | K V W E - S E E D K G       |
| UniRef90_E1K386_410_648        | D R I F D R F Y Q V D S P E K R I K G   | - G S G L G L A V C K S I I E T H H G   | T I W V E - S K L G R G     |
| UniRef90_B9M7U2_251_475        | E K I F E K F Y R I D N T D R R H I G   | - G T G L G L A I V R E I V A A H H G   | G R V W V T - S E V G R G   |
| UniRef90_Q3AAG9_206_440        | K R I F E R F Y R V D K A R S R E L G   | - G T G L G L A I V K H I I E L H N G   | K V W V K - S K V G E G     |
| UniRef90_UPI0001E8932B_350_584 | P R I F E R F Y R V D K A R S R N S G   | - G T G L G L A I V K H I V E A H H G   | S I S V T - S E L N K G     |
| UniRef90_C4G960_243_473        | D R I F E R F Y R V D K S H S R E I G   | - G T G L G L A I T Q N A I R M H H G   | E I R V A - S E L G Q G     |
| UniRef90_C6J6K9_342_579        | P R I F E R F Y R V D K A R S R S S G   | - G T G L G L S I V K H L V D L H R G   | T I R V E - S K V G E G     |
| UniRef90_A0YQV3_1128_1360      | V R L F E P F V Q I D S L S R R Y S     | - G T G L G L A L V R Q I T Q M H A G   | T V S L D - S E V G R G     |

UniRef90\_E3PT03\_185\_421  
UniRef90\_B7GGU1\_348\_587  
UniRef90\_Q39S62\_358\_588  
UniRef90\_B8DOH3\_363\_592  
UniRef90\_F5L948\_225\_461  
UniRef90\_E0NJE3\_365\_590  
UniRef90\_A7II27\_682\_911  
UniRef90\_B9DNB3\_332\_557  
UniRef90\_A7HN49\_181\_412  
UniRef90\_E6QIY0\_358\_593  
UniRef90\_F4L5H3\_895\_1123  
UniRef90\_A9AU3\_448\_692  
UniRef90\_Q1IKU6\_785\_1018  
UniRef90\_B5YD58\_456\_687  
UniRef90\_UPI00016BFB3D\_364\_592  
UniRef90\_E8SIU9\_335\_566  
UniRef90\_B9E797\_336\_561  
UniRef90\_Q8EPE4\_222\_453  
UniRef90\_D5DL55\_355\_590  
UniRef90\_E0HX50\_173\_410  
UniRef90\_B8DZU7\_455\_686  
UniRef90\_D6GSX7\_369\_596  
UniRef90\_D7CLL1\_123\_351  
UniRef90\_Q6LXP6\_406\_633  
UniRef90\_Q67LR3\_257\_496  
UniRef90\_A6LF23\_177\_414  
UniRef90\_B1HWE4\_263\_498  
UniRef90\_Q2B2H9\_351\_585  
UniRef90\_B8FA30\_356\_583  
UniRef90\_B5YJF0\_360\_619  
UniRef90\_F0JJT0\_240\_468  
UniRef90\_E1KHE7\_585\_832  
UniRef90\_C9LCS1\_237\_475  
UniRef90\_B7IEX9\_176\_421  
UniRef90\_Q8TMU8\_474\_720  
UniRef90\_Q7IY67\_354\_593  
UniRef90\_D5DMV7\_352\_585  
UniRef90\_A5D189\_222\_456  
UniRef90\_C027X8\_357\_585  
UniRef90\_D4TMU3\_804\_1043  
UniRef90\_Q0W6Q5\_299\_531  
UniRef90\_B9EGM6\_350\_585  
UniRef90\_UPI000212C3B1\_361\_596  
UniRef90\_A6UPU7\_401\_631  
UniRef90\_A5UQE0\_447\_687  
UniRef90\_A1HSJ7\_400\_654  
UniRef90\_F2JII5\_342\_577  
UniRef90\_Q8R6U6\_339\_575  
UniRef90\_Q8PT37\_279\_503  
UniRef90\_D8G5S6\_939\_1165  
UniRef90\_A8FJBS\_372\_608  
UniRef90\_A5ITL6\_318\_551  
UniRef90\_F6B3A9\_217\_450  
UniRef90\_D9QVY1\_356\_592  
UniRef90\_A9AA11\_406\_633  
UniRef90\_D5E8Z5\_365\_588  
UniRef90\_D2QCT5\_672\_903  
UniRef90\_A3DHV5\_362\_596  
UniRef90\_B0ADS6\_194\_431  
UniRef90\_E7RC70\_372\_606  
UniRef90\_A0B593\_141\_369  
UniRef90\_D4IVS0\_239\_469  
UniRef90\_B1YMQ3\_615\_835  
UniRef90\_C1F3B6\_554\_791  
UniRef90\_E7RJVO\_231\_462  
UniRef90\_D3UFQ2\_354\_596  
UniRef90\_E0RD24\_357\_594  
UniRef90\_F4LR44\_346\_580  
UniRef90\_Q7NDS1\_97\_331  
UniRef90\_Q647M8\_182\_410  
UniRef90\_B8G6G1\_479\_712  
UniRef90\_B7GK3\_359\_585  
UniRef90\_C1DVW6\_110\_330  
UniRef90\_C4L472\_342\_574  
UniRef90\_D7GFR0\_250\_485  
UniRef90\_B4S8R4\_490\_736  
UniRef90\_A5GAH6\_406\_635  
UniRef90\_C6WZ9\_504\_741  
UniRef90\_B0TGE0\_245\_473  
UniRef90\_D5E978\_387\_612  
UniRef90\_F5LRU7\_361\_595  
UniRef90\_Q4A159\_364\_598

D R I F E R F Y R V D K A R S R K K V G - G T G L G L A I V K H I V L N L N G N I K V H - S E L N K G  
P R I F E R F Y R V D K A R S R N S G - G T G L G L A I V K H L V E A H H G G A V G V E - S E V G I G G  
P R I F E R F Y R V D T A R S R D E G - G T G L G L S I V K H I V Q L H G G G R I S V K - S E V G I G G  
G R I F E R F Y R V D K A R S R S A S G - G T G I G L S I V K H I I K N H D S E I K V E - S E P G K G  
P R I F E R F Y R V D R A R S R A S G - G T G L G L A I V K H L V E A H H R G R I S V E - S E P G K G  
N K I F E R F Y R V E K S R S R E M G - G T G L G L S I A K E I L E S M G G R I S I E - S E I G V G G  
D T I F E K F R Q G G D A L T R P P - G T G L G L P I S R R I V E D H F G G R M W L E - N Q D G S G  
K H I F E R F Y R V D K A R S R D S G - G T G L G L S I T K H I V E A Y Q G G R I Q I E - S E P D V G  
K R L F E R F Y R V D K A R S R K V G - G T G L G L S I V K M I A D K H N A T I S F E - S K V G E G G  
E V I F E R F H Q G D A S D A R A L G - G T G M G L A L C R Q I V R Q H G G R I W A E - S E P D K G  
D A I F Q E F T Q G D A S T T R A F S - G T G L G L S I S K R L V E L H G G T M W L E - S E I D Q G  
P K L F T R F F R V D N S T T R K I G - G T G L G L S I T K A L I E L H G G R I W A T - S T L G R G G  
Q T I F E R F Y Q V D A S D S R D K G - G T G L G L A I C R S I V Q Q H G G S I W V D - S E I D K G  
P H I F D R F Y R V D S S L R K S T S - G T G L G L S I V K S I E A H H G G K I S V A - S K V G E G  
E R I F E R F Y R A D K A R S R K M G - G T G L G L S I A K E M V E L H G G S I K M E - S A L G H G G  
Y R I F E R F Y R V D K A R S R D S G - G T G L G L S I T K H I E A Y Q G N I E V A - S E L G K G  
T R I F E R F Y R V D K A R S R D S G - G T G L G L A I V K H I E V F N G G R I D V E - S E L G K G  
T R V F E R F Y R V D K A R S R N T G - G T G L G L A I V K H I V E V H K G K I D V E - S T L N Q G G  
P F V F E R F Y K A D K A R T R G K S - G T G L G L A I A K N I V E A H Q G G I I A V E - S E L N E G  
K H I F E R F Y R V D K A R S R K M G - G T G L G L A I T R F I V E K H G G T I S L E - S E Y T G G  
P H I F D R F Y R V D S S L R K S T S - G T G L G L S I V K S I V E A H H G G K I S A T - S K V G E G G  
E H I F D R F Y R V D K G R S R Q Q G - G T G L G L S I A K H I V E E H G G S I S V R - S D F G K G  
P R L F E R F Y R V D K A R S R E L G - G T G L G L A I V K H I V E S H G G E V F V E - S E L G K G  
E K I F N R F Y Q V D S S T K R K K G - G S G L G L A V C K S I V E A H H G G S I W V E - S E L G K G  
G L I F E R F Y R V D N A A S R K T G - G T G L G L T I C K A I V E E H G G Q I W V E - S A L G E G G  
K K L F E R F Y R V D K A R S R K M G - G T G L G L S I V K T I V E K H N G T I E F T - S K L G V G  
A R V F E R F Y R V D R A R S R N S G - G T G L G L A I V K H L V E A H H G G R I Q V E - S E V G V G  
P R I F E R F Y R I D K A R S R N S G - G T G L G L A I V K H L V E A H H G G S I T V E - S E V G K G G  
P R L F E R F Y R V D K A R S R N L G - G T G L G L A I V K H I M A A H H G G H V S V K - S E K G K G  
E R I F E K F K Q V G D L I R K K P K - G T G L G L A I S K Q I V E A H G G K I W V E - S E L G K G  
E R I F L K Y Y R - E P V R D S I D - C A G L G L A I A R R I V L A H D G G R I W V E - S E P R G G  
D T I F D R F Y Q I E N S K S S K V R - G T G I G L A Y T K E I V E L H E G G K I S V S - S I L G K G  
D R I F E R F Y R V D K S H S R E I G - G T G L G L A I T R N A I V M H R G A I K V K - S E E H K G  
K K L F E R F Y R V D K A R S R K M G - G T G L G L S I V K T I V E K H N G V I E F T - S K E V G G  
E K L F K P F S Q I D S S F S K R Y Q - G T G L G L A I V K E I V Q L H G G T V W F E - S E V G K G G  
P Y L F E R F Y R V D K A R K R G K A V - G T G I G L A I V K N I V E A H H G G K I S V E - S E L G K G  
S R I F E R F Y R V D K A R S R N S G - G T G L G L A I V K H L V E A H H G G E I V E K - S E V N K G  
S R V F E R F Y R V D K A R S R E Q G - G T G L G L S I V K H I I D A H R G S V Q V E - S K V G I G  
T R I F E R F Y R V D K A R S R D S G - G T G L G L A I V K H L V E L H G H H I S V E - S K E G R G  
E S I F E R F Y Q V D S S D S R N H D - G T G L G L A I C K S I V Q Q H G G K I W V K - S V L G G  
E N I F S G F Y H S G Y K L S Y E Y K - C A G L G L A I S R K I V E S H H G G K I W A D - S E P G K G  
D N I F E R F Y K V D Q A R T R G K H - G T G L G L F I V K S I V E G H H G G S I N V D - S T V G K G  
P R I F E R F Y R V D K A R S S S G - G T G L G L S I V K H L V E L H K G T I R V E - S E V G V G  
E K I F D Q F Y Q V D S S T K R K K G - G S G L G L A V C K S I I Q A H H G G T I W V E - S E L G R G G  
P R I W E R F Y R V D N G T T R R I G - G T G L G L S I A K A L V E L H G G R I W A E - S K L N K G  
E H I F E P P Y Q V S G N L T A K T P - G T G L G L A I T R Q L V E L H G G R I W L E R S - S E P G K G  
E R I F E R F Y R V D K A R S R K M G - G T G L G L S I A K E L M L L H H G G D I K I E - S Q L G Q G  
P R I F E R F Y R V D K A R S R E L G - G T G L G L S I V K Q I V E L H H G G K V K I E - S E L G K G  
K Q L F K P F K Q I D S T L S R K Y E - G T G L G L V L S K K F V E M H G G R I W V E - S E P G K G  
E S I F E R F Y Q V D S S D S R N H E - G T G L G L A I C R S I V Q Q H D G H I W V E - S V L G E G  
D K I F E R F Y R V D K A R T R K L G - G T G L G L A I A K E M V Q A H G G D I W A D - S I E G K G  
Q R I F E R F Y R V D K A R S R D S G - G T G L G L S I T K H I V E A H H Q G N I E V N - S Q V G K G  
P R I F E R F Y R V D K A R S R V M G - G T G L G L A I C K H I V E V H G G Q I E V E - S G P G - G  
P R I F E R F Y R V D K T R S R K L G - G T G L G L S I V K H I L E R H N G G I E V E - S K V E E G  
E K V F N R F Y Q V D S S T K R K K G - G S G L G L A V C K S I V E A H H G G S I W V E - S E L G K G  
E D I F D P F K Q V N S S S R E Y E - G T G L G L A L V K K Y V E M H D G E I W V E - S E V G A G  
Q L I F E K F Y Q A T N Q T L R K P K - G S G L G L A I T K K I A L H N G G Q I T V S - S V P G E G  
G R I F E R F Y R V D K A R S R E M G - G T G L G L A I A K E I V E A H H G G S I S V A - S E P G K G  
N R I F E R F Y R V D K A R S R D I G - G T G L G L A I T K H M V K S L G G N I T V E - S I L G I G  
D R I F D R F Y R V D R A R S R E M G - G T G L G L A I S K E M I N A H H G G V I W A E - S K L G K G  
D R I F E K F F V M S N E K S A D I - G M G L G L S I T K D I V E A H H G G R I W F E - S R F G E G  
D H I F E R F Y R A D K A S H S R E I G - G T G L G L A I T K S A I A M H N G E I K V R - S K L G E G  
S K L F D K F Y R V D N S E T R K I G - G T G L G L S I C K E I V K H N G T I D V E - S T I G A G  
S L I F E R F Y Q V D A S D S R A M G - G T G L G L A I C R R I V R Q H H G G Q I W V E - S E V G K G G  
G R L F E R F Y R V D R A R S R N S G - G T G L G L S I V K H L I E A H H G G H V E V D - S T V G V G  
P Y L F E R F Y R V D K A R K R G K A V - G T G I G L A I V K N I V E A H H G G K I S V K - S E L G K G  
P R I F E R F Y R V D K G R S R N S G - G T G L G L S I V K H L V D L H H G G T L S V E - S E L G L G  
D R I F E R F Y R V D R A S G E I G - G T G L G L A M V K H L V K G L E G G W I K V E - S E L E K G  
D Q I F N R F S R I D S P L T R E I R E - G T G L G L Y I T K S L V E S I L G G T I H V E - S R Y G V G  
K K L F K P F T Q I D S S M G R E H V - G T G L G L A I T K G I I Q A H N G K I W A E - S E L G K G  
A R L F E R F H R V D N S N T R Q K S - G V G L G L Y I T R L V L E L H G G R I W V Q - S T V G V G  
P F V F E R F Y K A D K A R T R G R S - G T G L G L A I A K N I V E A H H G G T I T V H - S K L G E G  
P L I F E R F Y R V D K S R S R N I G - G T G L G L S I V K H I T E A H H G G K V W V E - S K L G E G  
S R I F E R F Y R V D K A R S R N S G - G T G L G L A I V K H I I D L H H A T I D V E - S E E G K G  
E R V F E R F Y R V D K A R S R E T G - G T G L G L A I T K S V V L M H H G G A I R V D - S V E G E G  
D K I F E K F Y R V E R P - G E E I E - G T G L G L P I V K E I I A A H H G G S I E V N - S K K D F G  
E R I F E R F Y R V N N T A C R V F G - G T G L G L A I V R E I V T A H H G G E V W V E - S T L G K G  
G K I F E R F Y R V S G D E K T F F - G F G I G L Y I V K D I I Q R L D G G K I W V E - S E K N Q G  
P R I F E R F Y R V D K A R S R E L G - G T G L G L A I V K H I E R S H G G R V T V Q - S K V G G  
N M I F D P F I Q A D S N T R K Y G - G T G L G L A I V K E Y V E M H G G T I W V E - S E L G K G  
P R I F E R F Y R V D K A R S R S S G - G T G L G L S I V K H L V E M H H G G T I R V E - S E V G Y G  
D K I F D R F Y R V D K A R T R K M G - G T G L G L A I S K E I V E A H H G G R I W A N - S V E G Q G

Input pdb SEQRES 2C2A

UniRef90\_A5IIT0\_236\_493  
UniRef90\_B9KAB5\_220\_473  
UniRef90\_UPI000210F96E\_244\_482  
UniRef90\_B7IDY9\_224\_462  
UniRef90\_A6LN40\_223\_461  
UniRef90\_A8F6Z9\_244\_486  
UniRef90\_A7HK36\_224\_466  
UniRef90\_D5WTD2\_380\_614  
UniRef90\_Q67RF9\_205\_438  
UniRef90\_B3E3A4\_350\_579  
UniRef90\_C1P968\_353\_593  
UniRef90\_UPI000210FB4E\_174\_410  
UniRef90\_D7AHN4\_358\_582  
UniRef90\_D5X969\_353\_585  
UniRef90\_D8PBL4\_363\_603  
UniRef90\_D7UVZ9\_356\_591  
UniRef90\_C5D651\_348\_580  
UniRef90\_F4BLP5\_336\_567  
UniRef90\_Q3MGM2\_1112\_1344  
UniRef90\_B8G4S5\_316\_540  
UniRef90\_E0FRK4\_227\_461  
UniRef90\_B1ZT44\_154\_390  
UniRef90\_C9RTX6\_347\_579  
UniRef90\_A4XMJ6\_338\_561  
UniRef90\_UPI00018511C5\_286\_519  
UniRef90\_A5ILS8\_180\_410  
UniRef90\_B9K7H6\_180\_412  
UniRef90\_F2I7J7\_353\_596  
UniRef90\_B5YHW7\_385\_611  
UniRef90\_C0A490\_167\_399  
UniRef90\_D6XVE0\_357\_597  
UniRef90\_A6CR52\_338\_570  
UniRef90\_F5SLG1\_353\_585  
UniRef90\_A4FWN1\_406\_639  
UniRef90\_D3URW5\_355\_589  
UniRef90\_E8R548\_187\_428  
UniRef90\_C9RD18\_197\_417  
UniRef90\_C1PEW1\_349\_587  
UniRef90\_Q1DCL6\_267\_509  
UniRef90\_A8F5W9\_184\_414  
UniRef90\_Q2RFL3\_239\_485  
UniRef90\_D1JAG2\_243\_467  
UniRef90\_E5WJB7\_351\_584  
UniRef90\_F6CIV3\_222\_456  
UniRef90\_F6DKA0\_218\_449  
UniRef90\_E3Z246\_18\_252  
UniRef90\_B5YHI6\_153\_383  
UniRef90\_A9GF59\_268\_496  
UniRef90\_E8WRA5\_348\_584  
UniRef90\_Q097K6\_265\_506  
UniRef90\_E1KHP7\_365\_592  
UniRef90\_A9AVU3\_644\_869  
UniRef90\_A6UWZ1\_410\_640  
UniRef90\_D4Y401\_348\_580  
UniRef90\_D7ATL0\_341\_566  
UniRef90\_Q1PXZ9\_292\_526  
UniRef90\_E7M6U2\_368\_603  
UniRef90\_D7BCF8\_586\_818  
UniRef90\_D0MGH9\_109\_352  
UniRef90\_UPI000212A698\_523\_767  
UniRef90\_E1K386\_410\_648  
UniRef90\_B9M7U2\_251\_475  
UniRef90\_Q3AAG9\_206\_440  
UniRef90\_UPI0001E8932B\_350\_584  
UniRef90\_C4G960\_243\_473  
UniRef90\_C6J6K9\_342\_579  
UniRef90\_A0YQV3\_1128\_1360

S R F F V W I P K D R A G E D N R Q D N -  
S R F F V W I P K D R A G E D N R Q D N -  
S R F F V W I P Y D H G T E D N R - - - -  
S I F Y V - - - - - - - - - - - - - -  
T T F E L V I P - - - - - - - - - - - -  
S I F R V N I P - - - - - - - - - - - -  
T V F Y V K I P Q - - - - - - - - - - - -  
T K F I V T L P K N - - - - - - - - - - - -  
S R F F V Q F P R - - - - - - - - - - - -  
S T F T V I L P - - - - - - - - - - - -  
S T F T V T L P - - - - - - - - - - - -  
S T F I V T L P R T Q T R P D - - - - - -  
T T F T V V L P - - - - - - - - - - - -  
T T F - - - - - - - - - - - - - - - -  
S K F T F Y L P - - - - - - - - - - - -  
S R F V V H L P - - - - - - - - - - - -  
T T F S I H L P K T K - - - - - - - - - - - -  
T T F T V H F P K - - - - - - - - - - - -  
T T F I V R L P - - - - - - - - - - - -  
S N F Y F T L P - - - - - - - - - - - -  
S R F L F T L P L S R - - - - - - - - - - - -  
S V F T I E L P L K D R - - - - - - - - - - - -  
A R F F F T L P E A E A - - - - - - - - - - - -  
T V F T I H F P K - - - - - - - - - - - -  
T T F T V V L P - - - - - - - - - - - -  
T T F I V K V S K E - - - - - - - - - - - -  
T V M R V F L P K - - - - - - - - - - - -  
T L M R V Y L P K G R - - - - - - - - - - - -  
S T F T V Y L P K N - - - - - - - - - - - -  
S R F G F S F P - - - - - - - - - - - -  
A S F H F T L P - - - - - - - - - - - -  
T T F S V F L P F S Q G E D - - - - - - - -  
T T F T V T L N K - - - - - - - - - - - -  
T E I T L T F P R - - - - - - - - - - - -  
S T F H I I L P I S V E G Q - - - - - - - - - -  
S T F R V T L P K - - - - - - - - - - - -  
S R F T V R L P R Q R - - - - - - - - - - - -  
S R F W V Y L P S P Q - - - - - - - - - - - -  
T T F S F F L P K - - - - - - - - - - - -  
S R F T I H L P A G K A - - - - - - - - - - - -  
T S F T V K L P V E R - - - - - - - - - - - -  
S H F F F T L P I A A E E G G R S N Y Q E  
S T F - - - - - - - - - - - - - - - -  
T S F I I E L P K - - - - - - - - - - - -  
S L F Y F T L P - - - - - - - - - - - -  
S T F I F T L P - - - - - - - - - - - -  
S T F R V T L P K - - - - - - - - - - - -  
T K V K I V I P - - - - - - - - - - - -  
T Q F T V R L A R - - - - - - - - - - - -  
S V F S F T L P R A G D - - - - - - - - - - - -  
S L F T L Q L P A G K A - - - - - - - - - - - -  
T E V I V R L P - - - - - - - - - - - -  
T T F N V Q L P - - - - - - - - - - - -  
S T F H I L L P L D K - - - - - - - - - - - -  
T T F T V H F P K - - - - - - - - - - - -  
T I V R V K L P - - - - - - - - - - - -  
S T F Y F T I P - - - - - - - - - - - -  
T T F N I E L P - - - - - - - - - - - -  
T T F S L T L P - - - - - - - - - - - -  
S T F A F R L P V A L A G R S - - - - - - - -  
S T F T F T I D T K R N Q E - - - - - - - -  
S V F H I I I P - - - - - - - - - - - -  
S T F F I S L P - - - - - - - - - - - -  
S A F G F T I P - - - - - - - - - - - -  
T A F T V K L S K E - - - - - - - - - - - -  
T T F D V R I P - - - - - - - - - - - -  
T T F I L E L P - - - - - - - - - - - -  
S T F I V T L P - - - - - - - - - - - -

UniRef90\_E3PT03\_185\_421  
 UniRef90\_B7GGU1\_348\_587  
 UniRef90\_Q39S62\_358\_588  
 UniRef90\_B8DOH3\_363\_592  
 UniRef90\_F5L948\_225\_461  
 UniRef90\_EONJE3\_365\_590  
 UniRef90\_A7II27\_682\_911  
 UniRef90\_B9DNB3\_332\_557  
 UniRef90\_A7HN49\_181\_412  
 UniRef90\_E6QIY0\_358\_593  
 UniRef90\_F4L5H3\_895\_1123  
 UniRef90\_A9AUY3\_448\_692  
 UniRef90\_Q1IKU6\_785\_1018  
 UniRef90\_B5YD58\_456\_687  
 UniRef90\_UPI00016BFB3D\_364\_592  
 UniRef90\_E8SIU9\_335\_566  
 UniRef90\_B9E797\_336\_561  
 UniRef90\_Q8EPE4\_222\_453  
 UniRef90\_D5DL55\_355\_590  
 UniRef90\_E0HX50\_173\_410  
 UniRef90\_B8DZU7\_455\_686  
 UniRef90\_D6GSX7\_369\_596  
 UniRef90\_D7CLL1\_123\_351  
 UniRef90\_Q6LXP6\_406\_633  
 UniRef90\_Q67LR3\_257\_496  
 UniRef90\_A6LP23\_177\_414  
 UniRef90\_B1HWE4\_263\_498  
 UniRef90\_Q2B2H9\_351\_585  
 UniRef90\_B8FA30\_356\_583  
 UniRef90\_B5YJP0\_360\_619  
 UniRef90\_F0JJT0\_240\_468  
 UniRef90\_E1KHE7\_585\_832  
 UniRef90\_C9LCS1\_237\_475  
 UniRef90\_B7IEX9\_176\_421  
 UniRef90\_Q8TMU8\_474\_720  
 UniRef90\_Q71Y67\_354\_593  
 UniRef90\_D5DMV7\_352\_585  
 UniRef90\_A5D189\_222\_456  
 UniRef90\_C0Z7X8\_357\_585  
 UniRef90\_D4TMU3\_804\_1043  
 UniRef90\_Q0W6Q5\_299\_531  
 UniRef90\_B9E6M6\_350\_585  
 UniRef90\_UPI000212C3B1\_361\_596  
 UniRef90\_A6UPU7\_401\_631  
 UniRef90\_A5UQE0\_447\_687  
 UniRef90\_ALHSJ7\_400\_654  
 UniRef90\_F2JII5\_342\_577  
 UniRef90\_Q8R6U6\_339\_575  
 UniRef90\_Q8PT37\_279\_503  
 UniRef90\_D8G5S6\_939\_1165  
 UniRef90\_A8FUB5\_372\_608  
 UniRef90\_A5ITL6\_318\_551  
 UniRef90\_F6B3A9\_217\_450  
 UniRef90\_D9QVY1\_356\_592  
 UniRef90\_A9AA11\_406\_633  
 UniRef90\_D5E8Z5\_365\_588  
 UniRef90\_D2QCT5\_672\_903  
 UniRef90\_A3DHV5\_362\_596  
 UniRef90\_B0ADS6\_194\_431  
 UniRef90\_E7RC70\_372\_606  
 UniRef90\_A0B593\_141\_369  
 UniRef90\_D4IVS0\_239\_469  
 UniRef90\_B1YMQ3\_615\_835  
 UniRef90\_C1F3B6\_554\_791  
 UniRef90\_E7RJVO\_231\_462  
 UniRef90\_D3UPQ2\_354\_596  
 UniRef90\_EORD24\_357\_594  
 UniRef90\_F4LRR4\_346\_580  
 UniRef90\_Q7NDS1\_97\_331  
 UniRef90\_Q647M8\_182\_410  
 UniRef90\_B8G6G1\_479\_712  
 UniRef90\_B7GKK3\_359\_585  
 UniRef90\_C1DVW6\_110\_330  
 UniRef90\_C4L472\_342\_574  
 UniRef90\_D7GPR0\_250\_485  
 UniRef90\_B4S8R4\_490\_736  
 UniRef90\_A5GAH6\_406\_635  
 UniRef90\_C6WZ9\_504\_741  
 UniRef90\_B0TGE0\_245\_473  
 UniRef90\_D5E978\_387\_612  
 UniRef90\_F5LRU7\_361\_595  
 UniRef90\_Q4A159\_364\_598

S K F I I E F P K N - - - - -  
 T T F T V H F R A D A C A D E - - - - -  
 S E F W F T I K K - - - - -  
 S L F R F Y L N K - - - - -  
 S I F C V Y L Y Q K R - - - - -  
 T K M T L R F P - - - - -  
 A C F A F R L P - - - - -  
 T T F - - - - -  
 T F R V Y F K K - - - - -  
 S R F L F T L P A G S T A I D S - - - - -  
 S K F F F S L Q K - - - - -  
 T T F W V T L P - - - - -  
 S E F F I L L P R - - - - -  
 T T F T I R L P R - - - - -  
 T - - - - -  
 S R F K V V L P E - - - - -  
 S T F - - - - -  
 T T I H I Y I P K - - - - -  
 T T F F I K L P K - - - - -  
 T I L K V K L P - - - - -  
 T T F T I R L P R - - - - -  
 T V F T I S L P - - - - -  
 S T F G F S L W V - - - - -  
 S T F H I I L P - - - - -  
 S T F S F T I P V E P G G - - - - -  
 T K F I V T L P - - - - -  
 T T M I V M I P K N - - - - -  
 T T F K V Q L H R E - - - - -  
 A A F - - - - -  
 S T F Y F T I P L K R K E E F N E N I N - - - - -  
 A T F R F T L P - - - - -  
 S V F A V S L P - - - - -  
 T T F S V R I P L N Y I G - - - - -  
 T K F V V T L P I N R E E D N N - - - - -  
 S V F G F S I P - - - - -  
 S D F I I T L P - - - - -  
 T T F S V K L H K - - - - -  
 S T F S F V I P - - - - -  
 T T F T V T L P - - - - -  
 S S F Y F T L P - - - - -  
 S T F F I S L P K - - - - -  
 T T F V I S I P K V D D T K N N K - - - - -  
 T K F I I E M P - - - - -  
 S T F H I V L P - - - - -  
 S T F Y F T L P - - - - -  
 S R F T F V L P V R Q D G - - - - -  
 T K V I L N F P E - - - - -  
 T V V T V Q L P Y S K - - - - -  
 S T F T F E V P - - - - -  
 S I F Y F M I P - - - - -  
 T T V T F T L P Y N E E Q E D D - - - - -  
 S T F K V I L K D - - - - -  
 S T F S F T L P - - - - -  
 T K F I F W L P K P K - - - - -  
 S T F H I I L P - - - - -  
 S T F - - - - -  
 A E F T C S L P - - - - -  
 T E V T V K L P - - - - -  
 S D F I V T I P V D - - - - -  
 T S I F F T L P F E E D D G E - - - - -  
 S T F Y F T L P - - - - -  
 T T F D V R I P - - - - -  
 S T F T I R F P - - - - -  
 S S F F T V A R N V A - - - - -  
 T T F T I Y L P - - - - -  
 S D F I I T L P L E K - - - - -  
 T T F T V E L P - - - - -  
 T S F T V Y I P K - - - - -  
 S T F T V S L P A V Q A G - - - - -  
 S T F Y F V I P - - - - -  
 S S F S F T L P - - - - -  
 T T F T F T L P - - - - -  
 S K F F I K I P - - - - -  
 T T F T I T F P R - - - - -  
 S T F M V R I P - - - - -  
 S T F F V R L P L S T S G - - - - -  
 S T F F V S L P - - - - -  
 S K F Y F S L P - - - - -  
 S T F T V T F P - - - - -  
 S T F T F T I P - - - - -  
 T E F I I E L P - - - - -  
 T S I F I T L P - - - - -



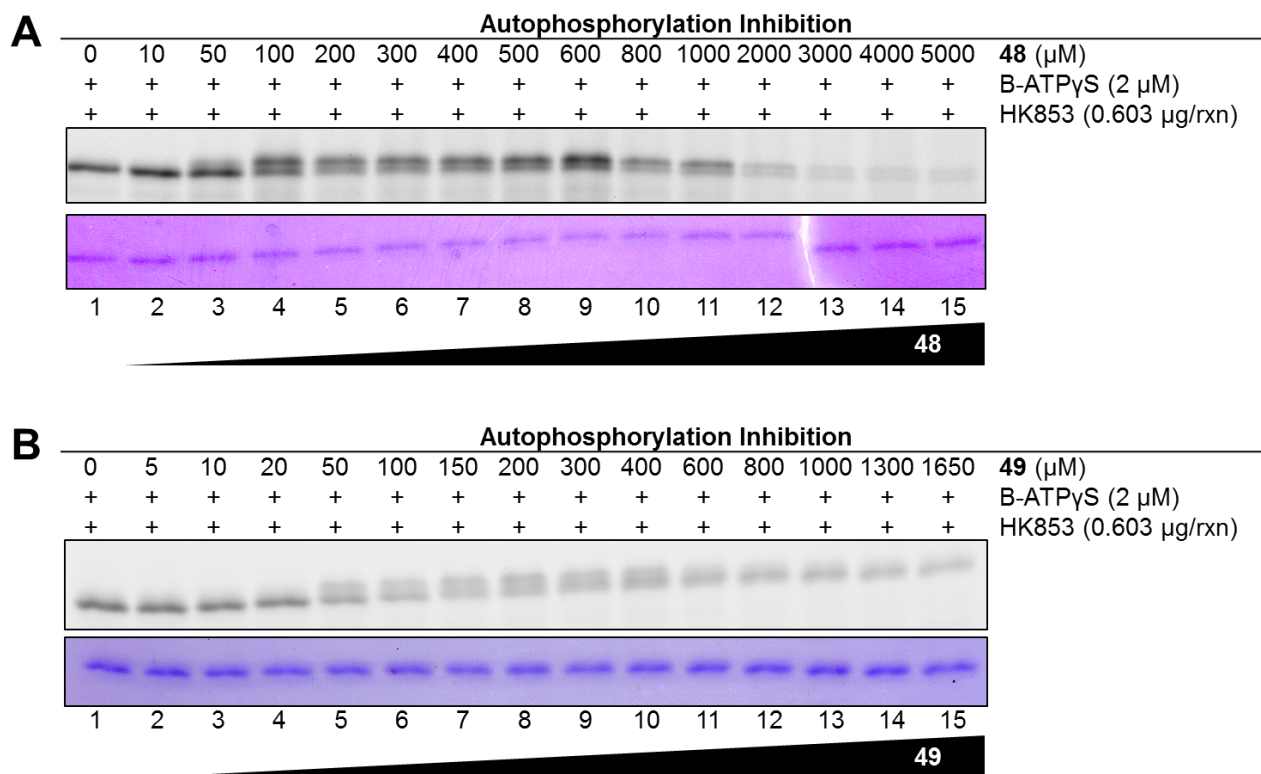

**Fig. S6** Competition of HK853 activity in the presence of guanidine derivatives **48** and **49**. Each lane contains 90 ng HK853 (A) Increasing concentrations of **48** competed with B-ATP $\gamma$ S only at concentrations greater than 800  $\mu\text{M}$  (B) Increasing concentrations of **49** competed steadily with B-ATP $\gamma$ S.

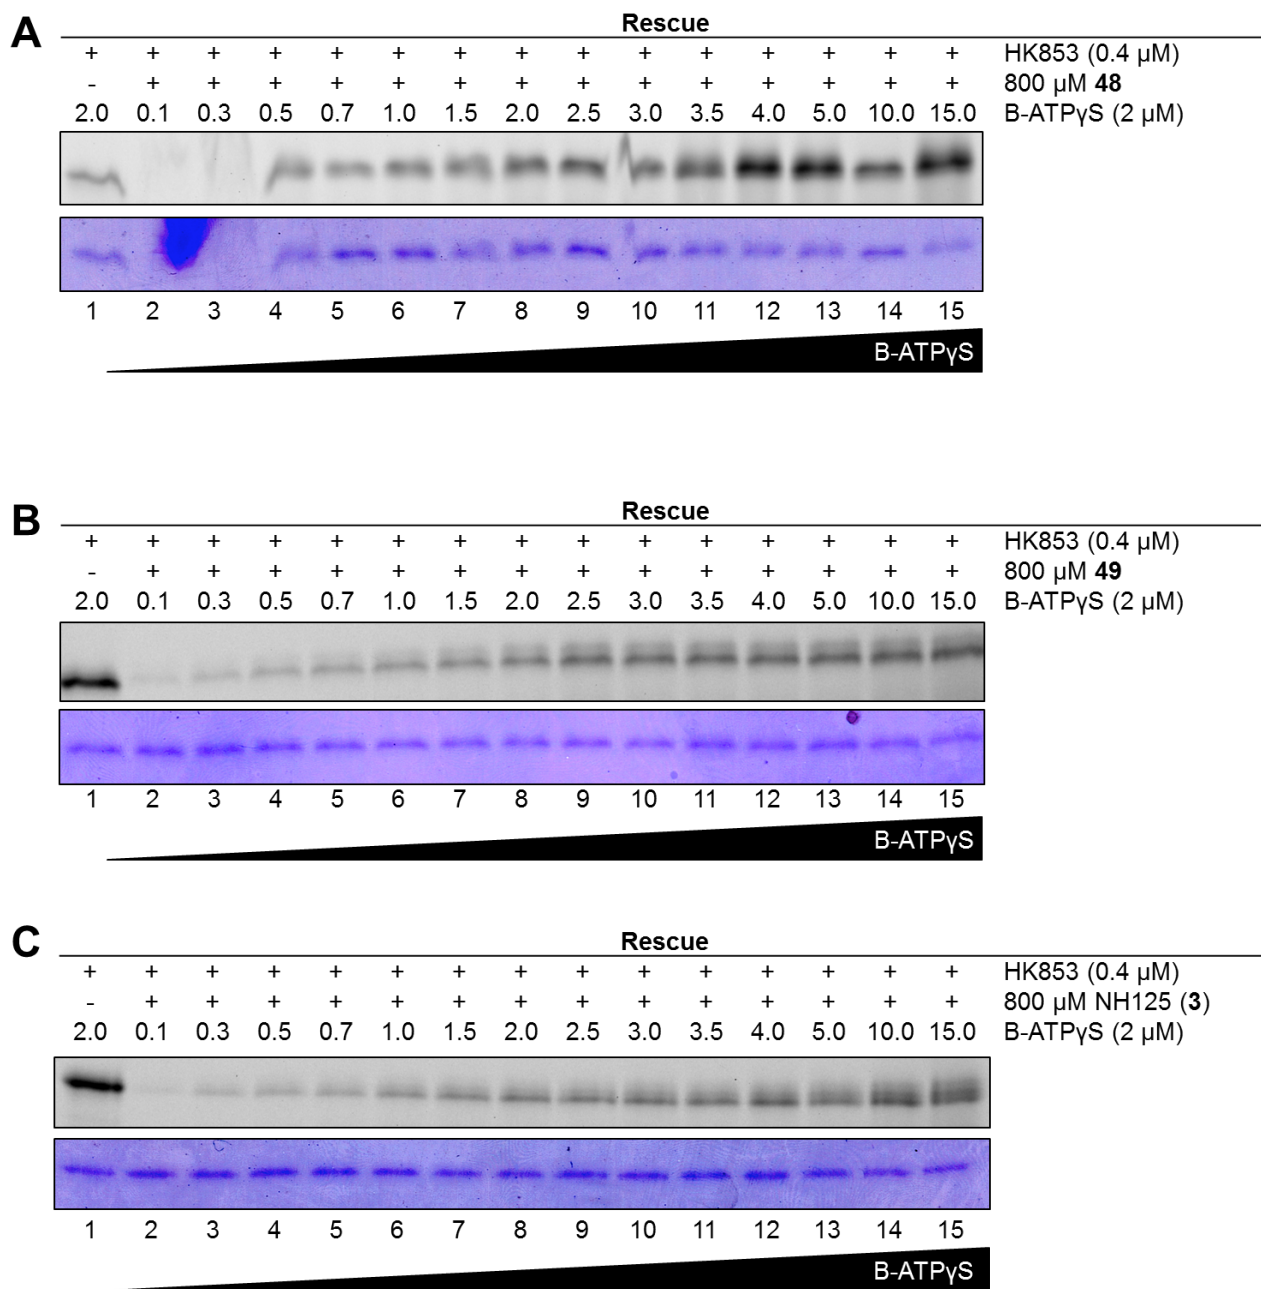

**Fig. S7** Rescue of HK853 activity in the presence of inhibitory concentrations of compounds **3**, **48** and **49**. Each lane contains 97 ng HK853. (A) A constant concentration of compound **48** (800  $\mu$ M) does not show competitive effects on B-ATP $\gamma$ S activity-based labeling of HK853. The defects in lanes 2-4 are due to a deformity in the gel (B) A constant concentration of compound **49** (800  $\mu$ M) prevents approximately 60% B-ATP $\gamma$ S labeling of HK853. The difference between lanes 1 and 8 illustrates the effects of **49** on the ability of HK853 to autothiophosphorylate. (C) NH125 (**3**) is marketed as an HK inhibitor, and inhibition of HK autophosphorylation was shown in previous studies<sup>19</sup>. A constant concentration of NH125 (**3**) (800  $\mu$ M) prevents approximately 60% B-ATP $\gamma$ S labeling of HK853. The difference between lanes 1 and 8 illustrates the effects of NH125 (**3**) on the ability of HK853 to autothiophosphorylate.

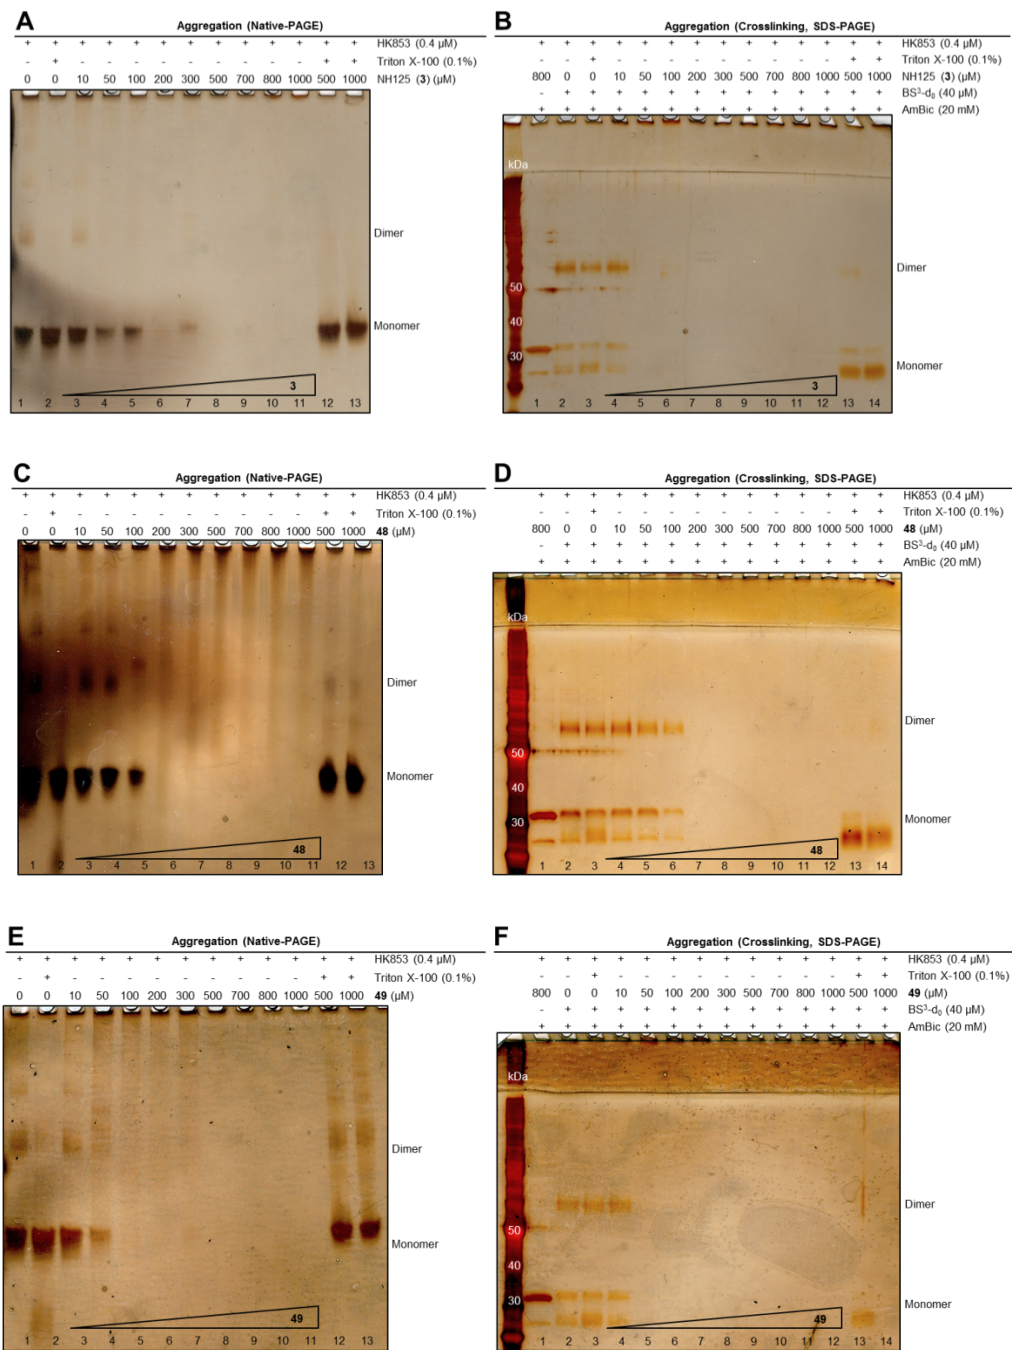

**Fig. S8** Aggregation analysis of HK853 in the presence of compounds **3**, **48** and **49**. (A) Native-PAGE shows that HK853 aggregates in the presence of greater than 100  $\mu$ M of compound **48**. 95 ng of HK853 was loaded in each lane. (B) Crosslinking experiments also show **48** causes aggregation at concentrations greater than 100  $\mu$ M. 85 ng HK853 was loaded per lane. The addition of Triton X-100 prevents **48**-induced aggregation (C) Native-PAGE shows that HK853 aggregates in the presence  $\sim$ 50  $\mu$ M **49**. 95 ng of HK853 was loaded in each lane. (D) Crosslinking experiments also show that **49** causes aggregation at concentrations of approximately 50  $\mu$ M. 85 ng HK853 was loaded per lane. The addition of Triton X-100 prevents **49**-induced aggregation. (E) Native-PAGE shows that HK853 aggregates in the presence of 50-

100  $\mu$ M NH125 (3). 95 ng of HK853 was loaded in each lane. The addition of Triton X-100 prevents NH125 (3)-induced aggregation (F) Crosslinking experiments also show that NH125 (3) causes aggregation at concentrations greater than 10  $\mu$ M. 85 ng HK853 was loaded per lane. The addition of Triton X-100 prevents NH125 (3)-induced aggregation.

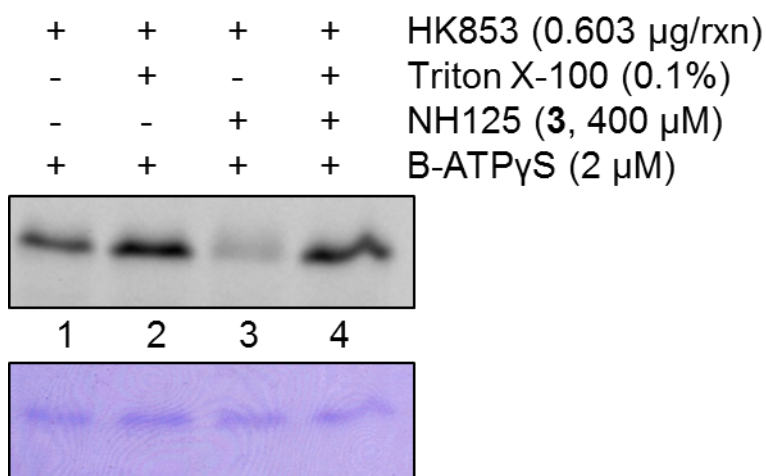

**Fig. S9** Triton X-100 restoration of HK853 activity labeling. Since NH125 (3) was proposed to be a nonspecific colloidal aggregator<sup>20</sup>, Triton X-100 was added to prevent NH 125-induced aggregation. As judged by coomassie staining, there is even loading of protein in lanes 3 and 4. Lane 3 in the fluorescence gel shows a drastic decrease in activity-based labeling; however, restoration of labeling was demonstrated when detergent was added in lane 4. This supports that the mechanism of HK inhibition by NH125 (3) is through aggregation. Additionally, Triton X-100 was used in aggregation experiments to restore HK853 to native oligomeric states. 90 ng HK853 was loaded per lane.

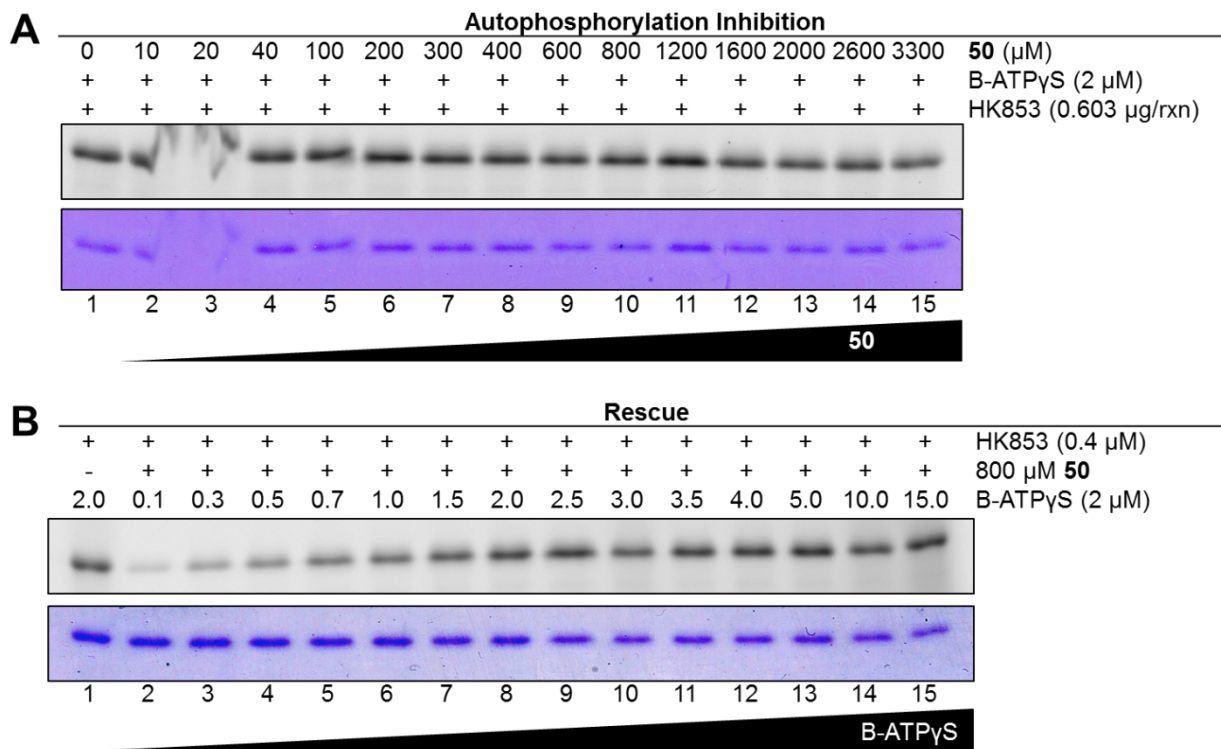

**Fig. S10** Competition and rescue of HK853 activity in the presence of compound **50** (A) Increasing concentrations of fragment **50** did not show competition with B-ATP $\gamma$ S. Each lane contains 90 ng HK853. The irregular band shapes in lanes 2 and 3 are due to a deformity in the gel. (B) A constant concentration of fragment **50** (800  $\mu\text{M}$ ) has no effect on B-ATP $\gamma$ S activity-based labeling of HK853. 97 ng of HK853 was loaded in each lane.

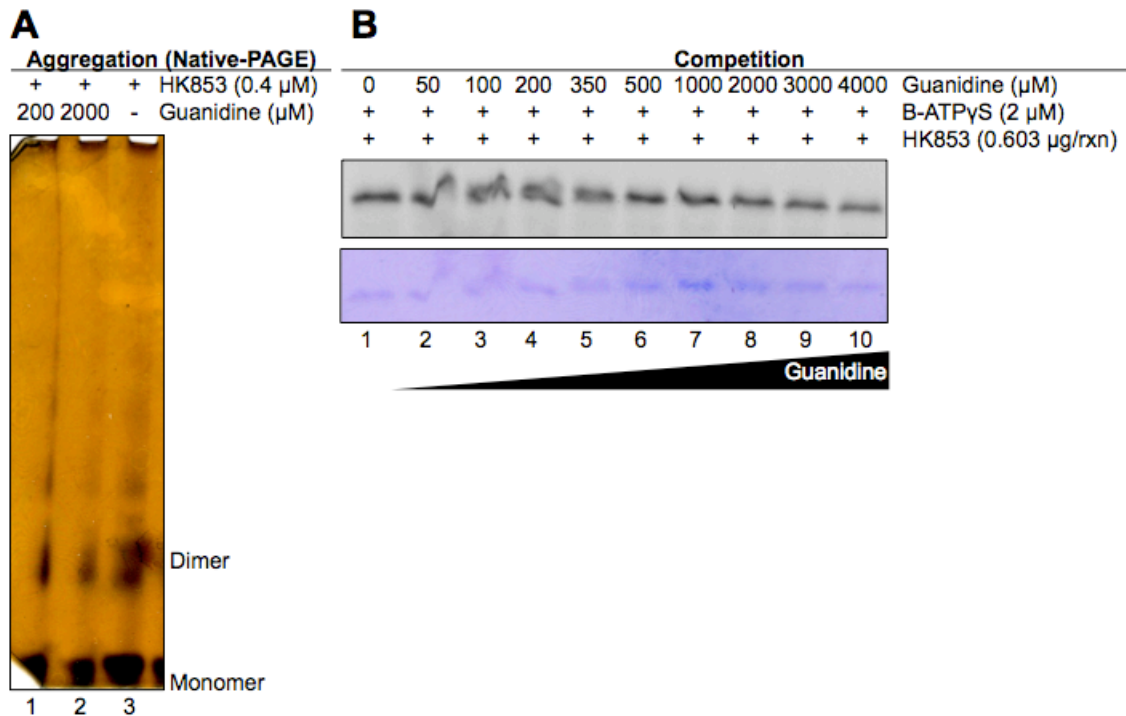

**Fig. S11.** Analysis of guanidine for HK853 aggregation and competition with activity-based probe. Since guanidinium salts can be used to denature proteins, we wanted to be sure that the guanidine group was not causing denaturation, thus decreasing the activity of HK853. The molar ratio of guanidine:guanidine-HCl is  $\sim 0.6:1$ . Guanidine-HCl was used to prepare known concentrations of guanidine, and the final pH was 8.5. (A) Native-PAGE shows that guanidine does not cause aggregation at concentrations as high as 2 mM. 85 ng HK853 was loaded per lane. (B) Increasing concentrations of guanidine were not shown to affect the autothiophosphorylation of HK853, ensuring that decreases in labeling in activity-based experiments were not due to guanidine-induced denaturation. Each lane contains 90 ng HK853. The irregular band shapes in lanes 2-4 are due to a deformity in the gel.

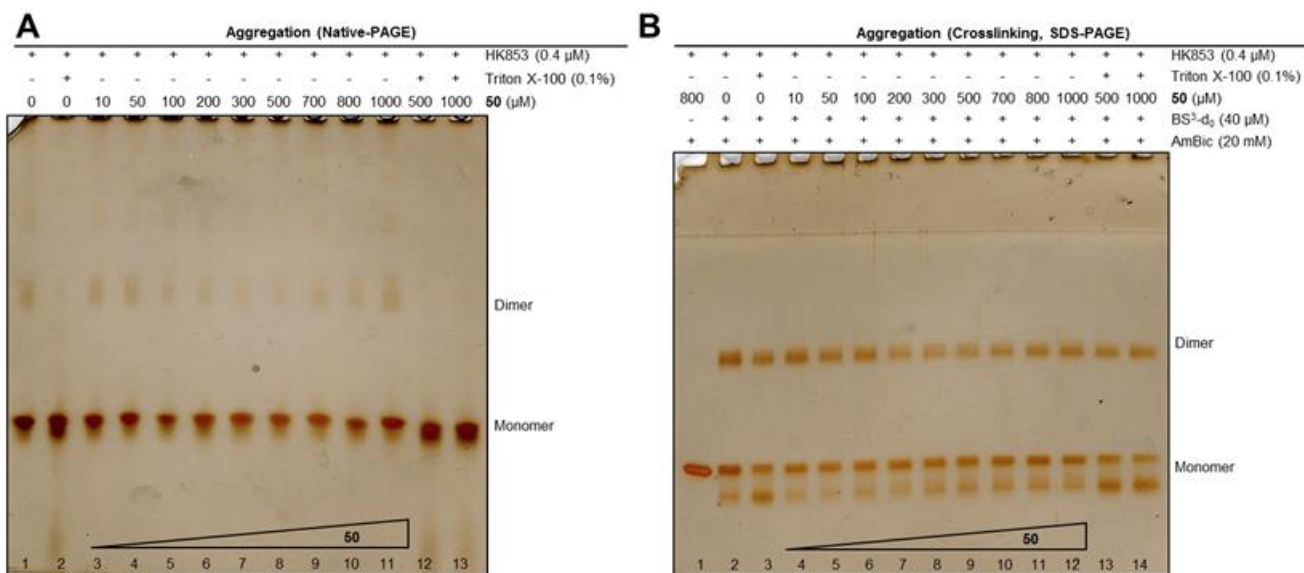

**Fig. S12.** Aggregation analysis of HK853 in the presence of the fragment **50**. (A) Native-PAGE shows that HK853 does not aggregate in the presence of the fragment **50**. 95 ng of HK853 was loaded in each lane. (B) Crosslinking experiments also show that the fragment **50** does not cause aggregation. 85 ng HK853 was loaded per lane.

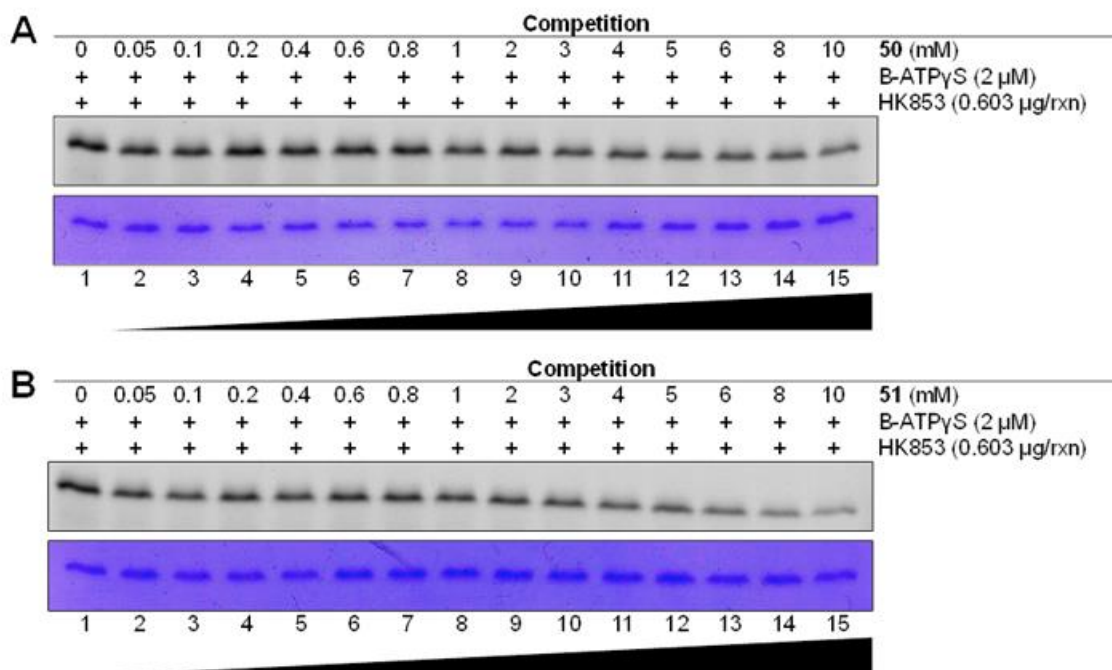

**Fig. S13** Competition of HK853 activity in the presence of guanidine fragments **50** and **51**. Each lane contains 90 ng HK853 (A) Increasing concentrations of **50** competed with B-ATP $\gamma$ S (B) Increasing concentrations of **51** competed with B-ATP $\gamma$ S.

**Table S2.** Competitive ABPP using 2  $\mu$ M B-ATP $\gamma$ S (probe) and increasing concentrations of **51** (competitor) with HK853. Bands correlate to **Fig. S13 B**.

| 51 (mM) | Integrated Density of Band Fluorescence (AU) |
|---------|----------------------------------------------|
| 0.00    | 271.17                                       |
| 0.05    | 205.95                                       |
| 0.10    | 177.52                                       |
| 0.20    | 216.84                                       |
| 0.40    | 188.02                                       |
| 0.60    | 221.99                                       |
| 0.80    | 212.36                                       |
| 1.00    | 186.24                                       |
| 2.00    | 200.62                                       |
| 3.00    | 188.26                                       |
| 4.00    | 165.37                                       |
| 5.00    | 162.81                                       |
| 6.00    | 139.09                                       |
| 7.00    | 103.35                                       |
| 10.00   | 86.01                                        |



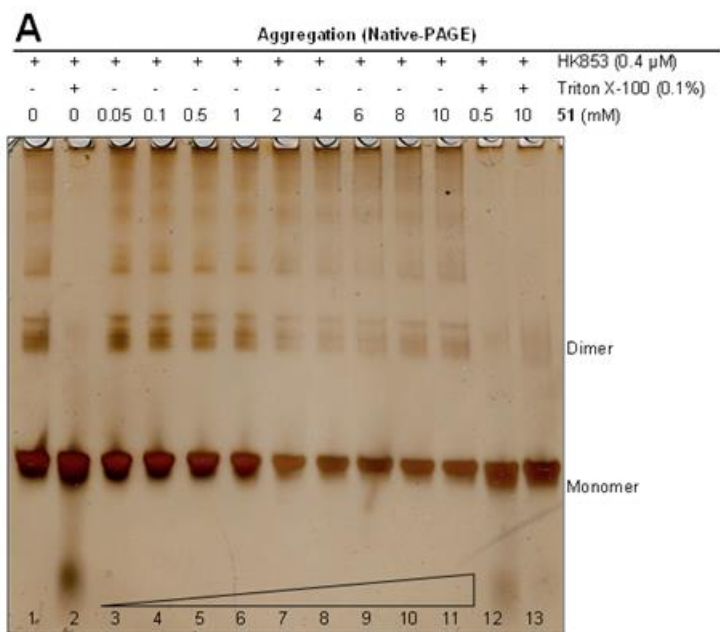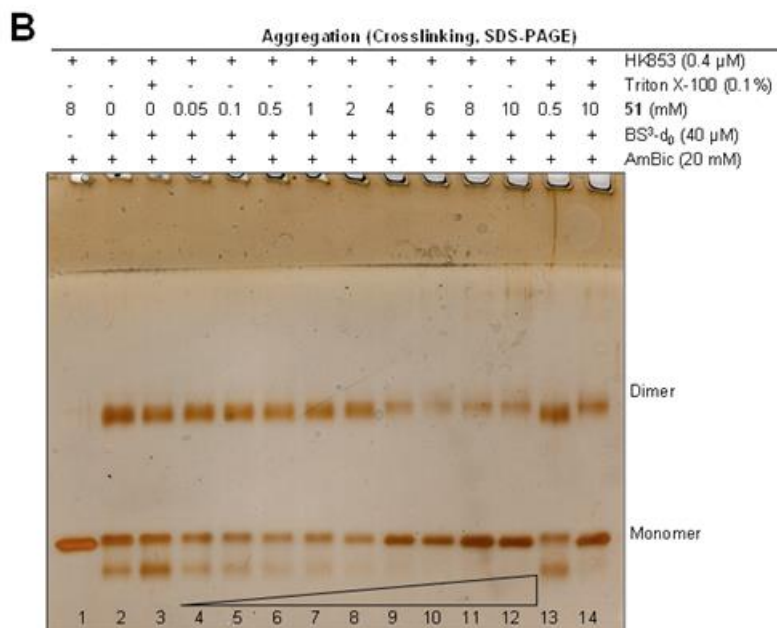

**Figure S14.** Aggregation analysis of HK853 in the presence of the modified fragment **51**. (A) Native-PAGE shows that HK853 aggregates slightly at concentrations between 4 and 8 mM of **51**. 95 ng of HK853 was loaded in each lane. (B) Crosslinking experiments also show that compound **51** causes subtle aggregation at concentrations in the low micromolar range only. 85 ng HK853 was loaded per lane.

## **Docking-Based Virtual Screening**

### **General**

All molecular modeling operations were performed using SYBYL X2.0 on a quad-core Intel Core i3 workstation operating at 3.06 GHz equipped with 4 GB 1333MHz DDR 3 RAM. Visualization of docked poses was accomplished using the latest available release of UCSF Chimera.

### **Docking of Compounds.**

The active sites of all receptors were defined based on the coordinates of the co-crystallized ligand and the Protomol Generation Mode in Surflex using default settings. A portion of the co-crystallized ligand was retained and used as a guide for the placement of compounds into the active site during docking. The Surflex-Dock parameters were configured as follows:

Max Conformations per Fragment: 10

Max Number of Rotatable Bonds per molecule: 50

Activated: Consider Ring Flexibility

Density of Search: 6.00

Maximum Number of Poses per Ligand: 10

Minimum RMSD Between Final Poses: 0.5

All other parameter were kept at their default values

## ***In Vitro* Activity Assays**

### **General Methods and Information**

Reagents were obtained from J.T. Baker, Mallinkrodt, Sigma, IBI, VWR, EMD Biosciences, Bio-Rad and Fisher. BODIPY-FL-ATP $\gamma$ S was purchased from Invitrogen, NH125 from Tocris Bioscience, and BS<sup>3</sup>-d<sub>0</sub> from Thermo Scientific.

### **Experimental Methods**

#### **HK853 Construct (*Thermotoga maritima*)**

The HK853 histidine kinase protein construct was generated as described previously<sup>21</sup>

#### **PCR Site-Directed Mutagenesis for Generation of HK853 D411A Construct<sup>22</sup>**

The DNA synthesized for wild-type HK853 was used as a template. Sense and antisense primers that originally coded for D411 were altered to alanine (See Table S3). Primers were ordered from New England Biolabs. Two reactions were prepared in PCR tubes: 2.5 ng HK853 wild-type DNA template, 2.5  $\mu$ L 2.5 mM dNTPs, 2.5  $\mu$ L 10 X Pfu buffer, 14.65  $\mu$ L nuclease-free water, and 0.25  $\mu$ L 100 X Pfu. To one tube, 2.5  $\mu$ L of 5  $\mu$ M mutant sense primer (FHJ088) and 2.5  $\mu$ L of 5  $\mu$ M outermost wild-type antisense primer were added. To the other, 2.5  $\mu$ L of 5  $\mu$ M outermost wild-type sense primer and 2.5  $\mu$ L of mutant antisense primer (FHJ089) were added. The final reaction volumes were 25  $\mu$ L. The PCR reaction was 95°C for 60 s; 30 cycles of 95°C for 30 s, 56°C for 120 s, and 72°C for 90 s; and 72°C for 360 s. To amplify the mutated template, 0.5  $\mu$ L of product from both the first and second tubes were mixed with 5.0  $\mu$ L 2.5 mM dNTPs, 5.0  $\mu$ L of 5  $\mu$ M outermost sense primer, 5.0  $\mu$ L of 5  $\mu$ M outermost antisense primer, 5.0  $\mu$ L of 10 X Pfu buffer, 28.5  $\mu$ L nuclease-free water, and 0.5  $\mu$ L 100 X Pfu to a total volume of 50  $\mu$ L. The same PCR method was run. PCR product was purified, digested, and ligated into the p-His-parallel vector as before.<sup>23</sup> The DNA sequence was confirmed as successful through sequencing at the Indiana Molecular Biology Institute. Additionally, transformation of p-His-parallel-HK853 D411A

into *E. coli* strain BL21 (DE3)Rosetta, pLysS, and subsequent protein overexpression and purification were performed as described previously<sup>21</sup>. Overexpressed mutant protein is shown in Fig. S15, and the final protein properties are shown in Table S4.

**Table S3.** Mutant primers used in PCR site-directed mutagenesis to generate HK853 D411A

| Primer | Sequence                                           | Comments                  |
|--------|----------------------------------------------------|---------------------------|
| KEW026 | TGAGAAAGACGGTGGTGTGCTGATCATCGTGGAG <b>GAT</b> AATG | Wild-type, sense, Asp     |
| KEW027 | GGTCCGGGATGCCGATACCATT <b>ATC</b> CTCCACGATGATCAG  | Wild-type, antisense, Asp |
| FHJ088 | TGAGAAAGACGGTGGTGTGCTGATCATCGTGGAG <b>GCG</b> AATG | Mutant, sense, Ala        |
| FHJ089 | GGTCCGGGATGCCGATACCATT <b>CGC</b> CTCCACGATGATCAG  | Mutant, antisense, Ala    |

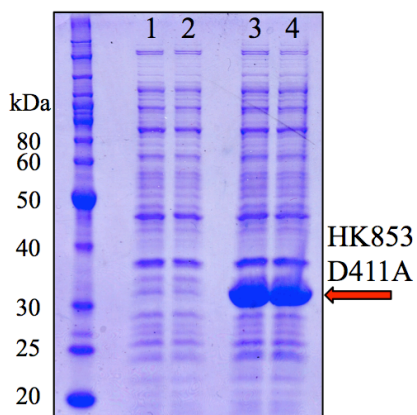

**Figure S15.** HK853 D411A overexpression. The protein ladder is on the left, non-induced *E. coli* lysate is in lanes 1 and 2 (two separate cultures), and induced *E. coli* lysate is in lanes 3 and 4 (two separate induced cultures).

**Table S4.** Final protein properties of the HK853 D411A mutant. Gray residues represent a polyhistidine tag coded by the p-His-parallel vector. The red residue is the mutated alanine. Values for pI and extinction coefficient are estimated.

| Protein     | Sequence                                                                                                                                                                                                                                                                                               | MW (kDa) | pI   | $\epsilon$ ( $M^{-1}cm^{-1}$ ) |
|-------------|--------------------------------------------------------------------------------------------------------------------------------------------------------------------------------------------------------------------------------------------------------------------------------------------------------|----------|------|--------------------------------|
| HK853 D411A | MSYYHHHHHDYDIPTTENLYFQGAMENVTESKELERLKRIDRMKTEFIANISHLRTPLTAIKA<br>YAETIYNLGLGDLSTLKEFLEVIIDQSNHLENLLNELLDIFSRLERKSLQINREKVDLCLVESAV<br>NAIKEFASSHNVNLFESNVPCPVEAYIDPTRIRQVLLNLLNNGVKYSKKDAPDKYVKVILDEKD<br>GGVLIIVEANGIGIPDHAKDRIFEQFYRVDSSLTYEVPGTGLGLAITKEIVELHGGRIWVESEVGK<br>GSRFFWIPKDRAGEDNRQDN | 32.4     | 5.27 | 27,390                         |

### Circular Dichroism (CD) Spectroscopy of HK853 Proteins

Previous CD methods were used as guidelines for this procedure.<sup>24, 25</sup> Using a Jasco J-715 CD spectropolarimeter, CD spectra were acquired for purified HK853 wild-type and D411A proteins. Proteins were exchanged into 10 mM potassium phosphate, pH 7.5, four times using 0.5-mL 10K Amicon Ultra centrifugal filters (Millipore). The Bio-Rad DC Protein Assay was used to determine protein concentrations, which were 0.111 mg/mL for HK853 wild-type and 0.110 mg/mL for HK853 D411A. Buffer and protein solutions were filtered with 0.22- $\mu$ m Ultrafree-MC centrifugal filters (Millipore) to ensure the removal of any particulates that could interfere with CD readings. Protein solutions were loaded into a 0.1-cm quartz cuvette (Hellma), and spectra were obtained at 25°C. Each spectrum was measured in triplicate with the following parameters: standard (100 mdeg) sensitivity, 190-270 nm range, 0.5 nm data pitch, continuous scanning mode, scanning speed of 100 nm/min, response of 1 s, 1.0-nm bandwidth, and an accumulation of 4 scans. Spectra were smoothed using a Savitsky-Golay filter (15-point smoothing window). Averaged buffer spectra were subtracted from the protein spectra. The CD data in millidegrees were used to calculate mean residue ellipticity,  $[\theta]$ , according to the following equation:  $[\theta] = (\text{millidegrees}) / (\text{path length in mm} \times \text{concentration in M} \times \text{number of amino acid residues})$ .<sup>25</sup> The final units for mean residue ellipticity were  $\text{deg cm}^{-1} \text{dmol}^{-1}$ . Additionally, data from each CD spectrum (in millidegrees) were submitted to Dichroweb for secondary structure analysis using SELCON3 and reference set 4.<sup>26-28</sup> Values for helices, strands, and turns from each spectrum were averaged, and error

was reported as the standard deviation. NRMSD values for Dichroweb results ranged from 0.037 to 0.052.

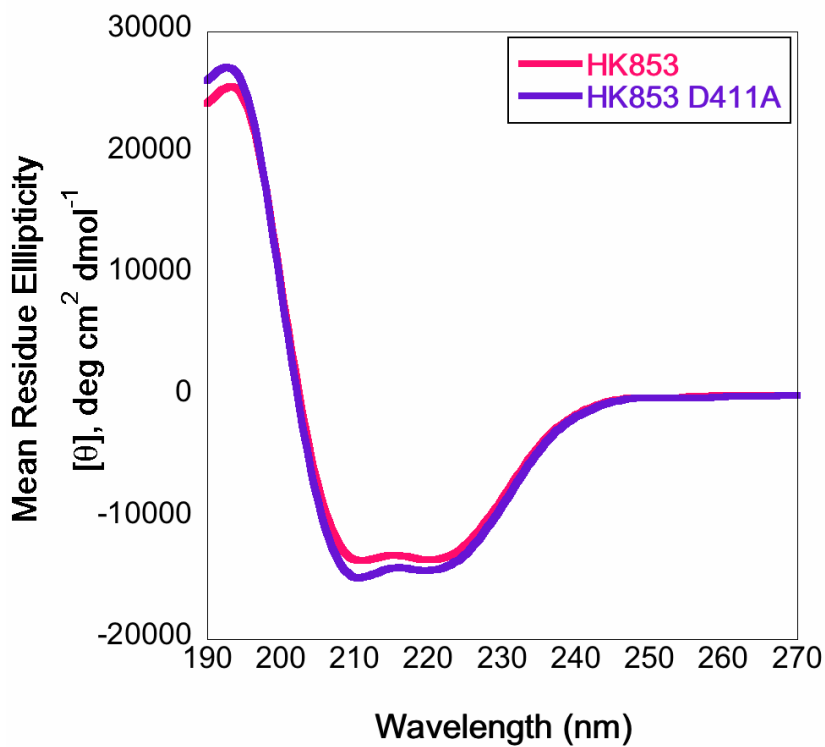

**Fig. S16** CD spectra of HK853 wild-type (pink) and D411A (purple) proteins scanned from 190-270 nm shown as mean residue ellipticity.

**Table S5** Estimated secondary structure of HK853 proteins (n=3)

| Construct       | % $\alpha$ -helix | % $\beta$ -sheet | % turn         |
|-----------------|-------------------|------------------|----------------|
| HK853 wild-type | 42.1 $\pm$ 0.3    | 14.7 $\pm$ 0.3   | 16.6 $\pm$ 0.1 |
| HK853 D411A     | 44.3 $\pm$ 0.5    | 14.1 $\pm$ 0.4   | 16.6 $\pm$ 0.3 |

### **Rescue ABPP analysis of NH125 (3), 48, 49, 50 and 51**

All analogues except AMP-PNP were dissolved in DMSO, and the final DMSO concentration per sample was no greater than 5% (v/v) as stated previously.

Purified HK853 (0.4  $\mu\text{M}$ ) in reaction buffer was incubated with a constant concentration (600 or 800  $\mu\text{M}$ ) of analogue for 30 min. Individual samples were mixed with 1  $\mu\text{L}$  increasing concentrations of B-ATP $\gamma\text{S}$  (0.1-15  $\mu\text{M}$  final concentration) and incubated at RT for 1 h in the dark to prevent fluorophore photobleaching. After incubation, reactions were quenched with 2X SDS-PAGE loading buffer. Samples were not heated before running on SDS-PAGE gels. After analyzing gels by fluorescence, they were coomassie stained.

## Saturation Transfer Differential NMR Experiments

All NMR spectra were acquired at 298 K on a Varian DDR 600 MHz spectrometer operating at 599.8 MHz or a Varian DDR 800 MHz spectrometer operating at 799 MHz for <sup>1</sup>H, both equipped with a 5mm triple resonance inverse detection probe with z-axis gradient. Saturation transfer difference (STD) spectra were acquired using a standard Varian STD pulse sequence that subtracts NOE spectra from reference spectra during the experiment.<sup>29</sup> Saturation transfer time was 2 s using a 47 ms Gaussian pulse. Irradiation was alternated between 0.73 ppm and 30.2 ppm for the NOE and reference portions, respectively.

### Sample preparation

Ligand stocks were made with DMSO-d<sub>6</sub> and phosphate buffers were prepared in D<sub>2</sub>O.

Unless otherwise noted, each sample tube contained 5 mM ligand + 0.25 mM protein (20:1 excess of ligand to protein) + 75 mM phosphate buffer in a 500 μL total volume D<sub>2</sub>O.

### Determination of K<sub>d</sub> Using STD-NMR

The approach of Angulo et al. was used to construct the binding isotherms of compounds **50** and **51** to HK853 using the initial growth rates approach (Tables S5 and S6).<sup>11</sup> A variant of the STD-NMR sequence was utilized for selective saturation and the acquisition of on- and off resonance spectra<sup>30</sup>. Values of 0.73 ppm and 30.2 ppm were used for on- and off resonance frequencies, respectively. To construct the STD buildup curves (Figs. S17 and S18), stock solutions of compounds **50** and **51** in DMSO were titrated (DMSO did not exceed 1% v/v) into a sample of 0.53 μM HK853 in 500 μL D<sub>2</sub>O and spectra were acquired at 25 °C using an array of saturation times of 1, 2, 3 and 4 s. The concentrations of compounds **50** and **51** ranged from 0.6 – 4 mM and the samples were allowed to equilibrate for 15 min between titrations. Plotting the initial slopes and fitting to a Langmuir isotherm yielded the thermodynamic K<sub>d</sub> values of **50** and **51**.<sup>31</sup> Data were based on the aromatic protons of **50** (6.80-6.84 ppm) and **51** (7.85-7.90 ppm) and processed using MestreNova 6.02.



**Table S5** Initial slopes of the STD build up curves for compound **50**

| Ligand concentration (mM) | STD-AF <sub>max</sub> | K <sub>sat</sub> (s <sup>-1</sup> ) | STD-AF <sub>0</sub> |
|---------------------------|-----------------------|-------------------------------------|---------------------|
| 0.6                       | 184.56                | 0.68                                | 124.50              |
| 0.8                       | 229.83                | 0.58                                | 132.45              |
| 1                         | 307.37                | 0.44                                | 135.41              |
| 2                         | 587.79                | 0.42                                | 244.66              |
| 4                         | 1431                  | 0.23                                | 329.13              |

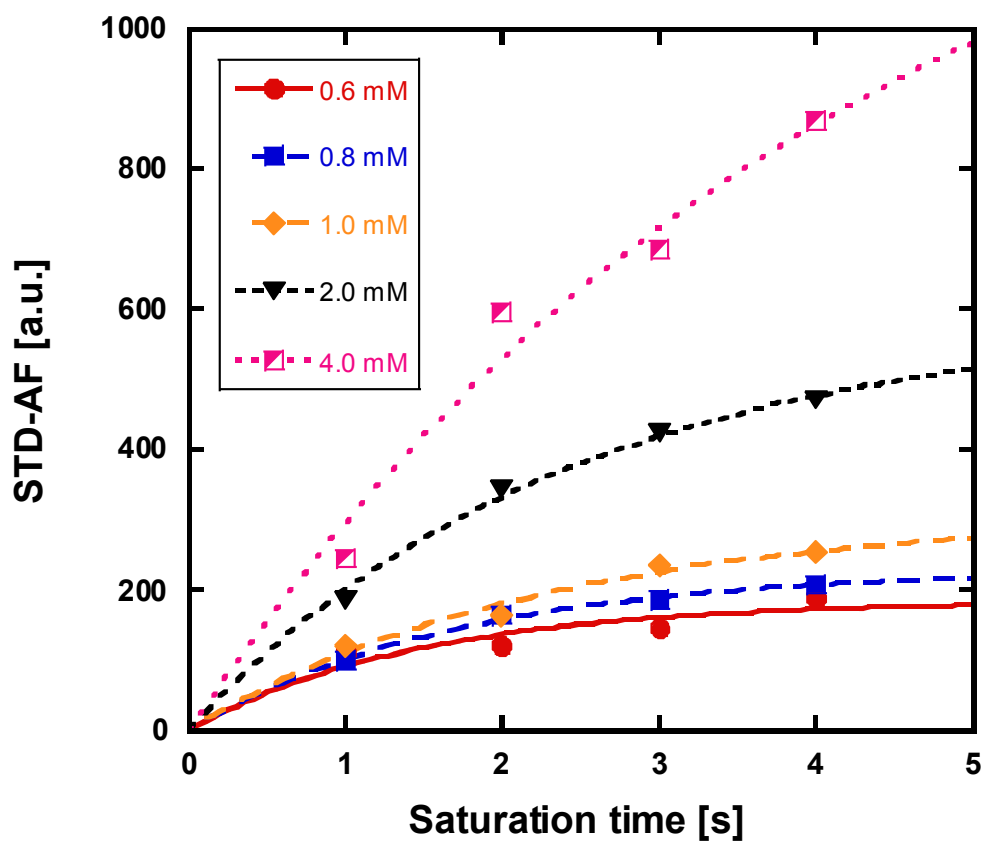

**Figure S17.** STD-Buildup curves of compound **50**'s binding to HK853.

**Table S6** Initial slopes of the STD build up curves for compound **51**

| Ligand concentration (mM) | STD-AF <sub>max</sub> | K <sub>sat</sub> (s <sup>-1</sup> ) | STD-AF <sub>0</sub> |
|---------------------------|-----------------------|-------------------------------------|---------------------|
| 0.6                       | 156.17                | 0.35                                | 53.97               |
| 0.8                       | 158.55                | 0.42                                | 67.25               |
| 1                         | 187.77                | 0.37                                | 69.81               |
| 2                         | 327.32                | 0.25                                | 82.41               |
| 3                         | 394.31                | 0.24                                | 94.37               |

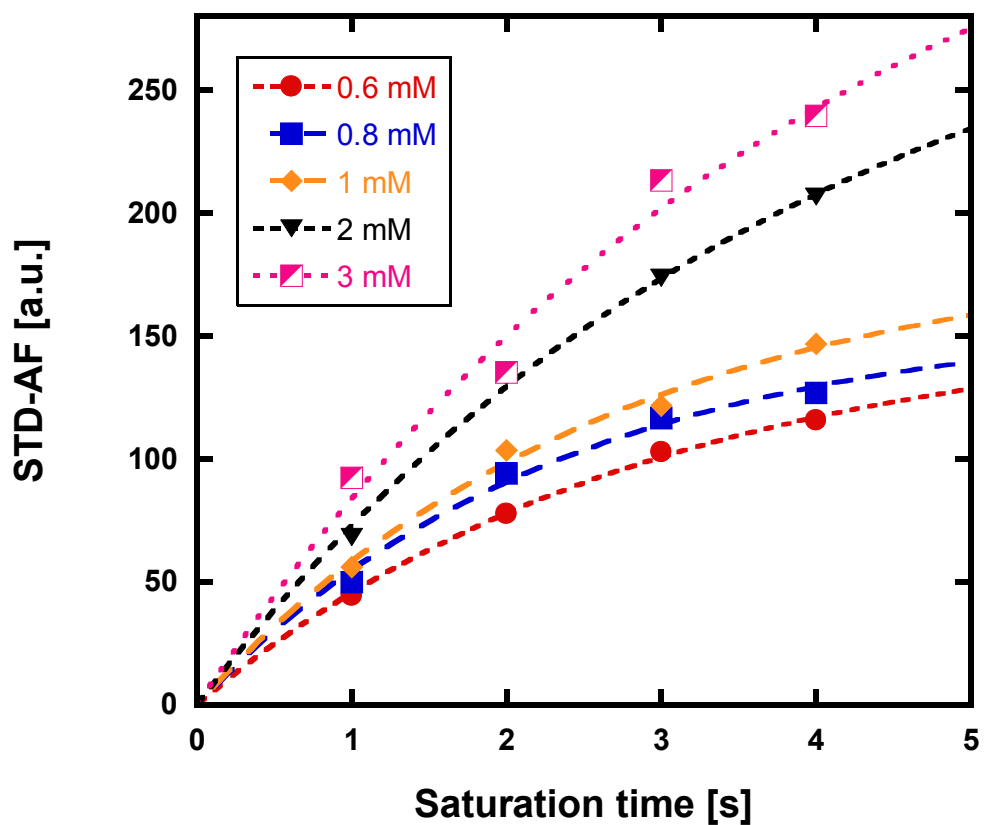

**Figure S18.** STD-Buildup curves of compound **51**'s binding to HK853.

## Measurement of STD Amplification Factors

The STD spectra were quantitatively analyzed by calculation of the STD amplification factors  $f_{\text{STD}}^{32}$  of the averaged aromatic regions of a single sample containing 1 mM tyramine, ADP, **50** and **51** and 0.53  $\mu\text{M}$  HK853 in 500  $\mu\text{L}$   $\text{D}_2\text{O}$ . Peak processing was performed using VNMRJ.

## References

1. S. Roychoudhury, N. A. Zielinski, A. J. Ninfa, N. E. Allen, L. N. Jungheim, T. I. Nicas and A. M. Chakrabarty, *Proc. Natl. Acad. Sci. U. S. A.*, 1993, **90**, 965-969.
2. J. E. Foster, Q. Sheng, J. R. McClain, M. Bures, T. I. Nicas, K. Henry, M. E. Winkler and R. Gilmour, *Microbiology*, 2004, **150**, 885-896.
3. N. Li, F. Wang, S. Niu, J. Cao, K. Wu, Y. Li, N. Yin, X. Zhang, W. Zhu and Y. Yin, *BMC Microbiol.*, 2009, **9**, 129.
4. Z. Qin, J. Zhang, B. Xu, L. Chen, Y. Wu, X. Yang, X. Shen, S. Molin, A. Danchin, H. Jiang and D. Qu, *BMC Microbiol.*, 2006, **6**, 96.
5. R. Gilmour, J. E. Foster, Q. Sheng, J. R. McClain, A. Riley, P.-M. Sun, W.-L. Ng, D. Yan, T. I. Nicas, K. Henry and M. E. Winkler, *J. Bacteriol.*, 2005, **187**, 8196-8200.
6. E. Furuta, K. Yamamoto, D. Tatebe, K. Watabe, T. Kitayama and R. Utsumi, *FEBS Lett.*, 2005, **579**, 2065-2070.
7. J. J. Hilliard, R. M. Goldschmidt, L. Licata, E. Z. Baum and K. Bush, *Antimicrob. Agents Chemother.*, 1999, **43**, 1693-1699.
8. D. J. Hlasta, J. P. Demers, B. D. Foleno, S. A. Fraga-Spano, J. Guan, J. J. Hilliard, M. J. Macielag, K. A. Ohemeng, C. M. Sheppard, Z. Sui, G. C. Webb, M. A. Weidner-Wells, H. Werblood and J. F. Barrett, *Bioorg. Med. Chem. Lett.*, 1998, **8**, 1923-1928.
9. Z. Sui, J. Guan, D. J. Hlasta, M. J. Macielag, B. D. Foleno, R. M. Goldschmidt, M. J. Loeloff, G. C. Webb and J. F. Barrett, *Bioorg. Med. Chem. Lett.*, 1998, **8**, 1929-1934.
10. J. F. Barrett, R. M. Goldschmidt, L. E. Lawrence, B. Foleno, R. Chen, J. P. Demers, S. Johnson, R. Kanojia, J. Fernandez, J. Bernstein, L. Licata, A. Donetz, S. Huang, D. J. Hlasta, M. J. Macielag, K. Ohemeng, R. Frechette, M. B. Frosco, D. H. Klaubert, J. M. Whiteley, L. Wang and J. A. Hoch, *Proc. Natl. Acad. Sci. U. S. A.*, 1998, **95**, 5317-5322.
11. J. Angulo, P. M. Enríquez-Navas and P. M. Nieto, *Chemistry – A European Journal*, 2010, **16**, 7803-7812.
12. R. M. Kanojia, W. Murray, J. Bernstein, J. Fernandez, B. D. Foleno, H. Krause, L. Lawrence, G. Webb and J. F. Barrett, *Bioorg. Med. Chem. Lett.*, 1999, **9**, 2947-2952.
13. H. Ramström, M. Bourotte, C. Philippe, M. Schmitt, J. Haiech and J.-J. Bourguignon, *J. Med. Chem.*, 2004, **47**, 2264-2275.
14. S. J. Trew, S. K. Wrigley, L. Pairet, J. Sohal, P. Shanu-Wilson, M. A. Hayes, S. M. Martin, R. N. Manohar, M. I. Chicarelli-Robinson, D. A. Kau, C. V. Byrne, E. M. Wellington, J. M. Moloney, J. Howard, D. Hupe and E. R. Olson, *J. Antibiot. (Tokyo)*, 2000, **53**, 1-11.
15. A. Okada, Y. Gotoh, T. Watanabe, E. Furuta, K. Yamamoto and R. Utsumi, *Methods Enzymol.*, 2007, **422**, 386-395.
16. T. Kitayama, R. Iwabuchi, S. Minagawa, S. Sawada, R. Okumura, K. Hoshino, J. Cappiello and R. Utsumi, *Bioorg. Med. Chem. Lett.*, 2007, **17**, 1098-1101.

17. Z. Qin, B. Lee, L. Yang, J. Zhang, X. Yang, D. Qu, H. Jiang and S. Molin, *FEMS Microbiol. Lett.*, 2007, **273**, 149-156.
18. H. Ashkenazy, E. Erez, E. Martz, T. Pupko and N. Ben-Tal, *Nucleic Acids Res.*, 2010, **38**, W529-W533.
19. A. M. Bilwes, C. M. Quezada, L. R. Croal, B. R. Crane and M. I. Simon, *Nat. Struct. Mol. Biol.*, 2001, **8**, 353-360.
20. A. Hirschman, M. Boukhvalova, R. VanBruggen, A. J. Wolfe and R. C. Stewart, *Biochemistry*, 2001, **40**, 13876-13887.
21. K. E. Wilke, S. Francis and E. E. Carlson, *J. Am. Chem. Soc.*, 2012, **134**, 9150-9153.
22. K. L. Heckman and L. R. Pease, *Nat. Protocols*, 2007, **2**, 924-932.
23. P. Sheffield, S. Garrard and Z. Derewenda, *Protein Expr. Purif.*, 1999, **15**, 34-39.
24. A. D. Gutu, K. J. Wayne, L.-T. Sham and M. E. Winkler, *J. Bacteriol.*, 2010, **192**, 2346-2358.
25. N. J. Greenfield, *Nat. Protocols*, 2007, **1**, 2876-2890.
26. L. Whitmore and B. A. Wallace, *Biopolymers*, 2008, **89**, 392-400.
27. L. Whitmore and B. A. Wallace, *Nucleic Acids Res.*, 2004, **32**, W668-W673.
28. A. Lobley, L. Whitmore and B. A. Wallace, *Bioinformatics*, 2002, **18**, 211-212.
29. J. Seidler, S. L. McGovern, T. N. Doman and B. K. Shoichet, *J. Med. Chem.*, 2003, **46**, 4477-4486.
30. M. Mayer and B. Meyer, *J. Am. Chem. Soc.*, 2001, **123**, 6108-6117.
31. Due to artifacts in the STD spectra, points at the concentration intervals of 3 mM (**50**) and 4 mM (**51**) were excluded from the plot.
32. S. Barelier, J. Pons, K. Gehring, J.-M. Lancelin and I. Krimm, *J. Med. Chem.*, 2010, **53**, 5256-5266.
